# Supplementary material for: Factors influencing the implementation of labour companionship: formative qualitative research in Thailand
Source: PubMed Central journal article supplement (PMC9327797; doi:10.1136/bmjopen-2021-054946), 2022-05-26

# BMJ Open

BMJ Open is committed to open peer review. As part of this commitment we make the peer review history of every article we publish publicly available.

When an article is published we post the peer reviewers' comments and the authors' responses online. We also post the versions of the paper that were used during peer review. These are the versions that the peer review comments apply to.

The versions of the paper that follow are the versions that were submitted during the peer review process. They are not the versions of record or the final published versions. They should not be cited or distributed as the published version of this manuscript.

BMJ Open is an open access journal and the full, final, typeset and author-corrected version of record of the manuscript is available on our site with no access controls, subscription charges or pay-per-view fees (<http://bmjopen.bmj.com>).

If you have any questions on BMJ Open's open peer review process please email [info.bmjopen@bmj.com](mailto:info.bmjopen@bmj.com)

# BMJ Open

## Factors influencing the implementation of labour companionship: formative qualitative research in Thailand

|                               |                                                                                                                                                                                                                                                                                                                                                                                                                                                                                                                                                                                                                                                                                                                                                                                                                                                                                                                                                                                                                                                                                                                                                                   |
|-------------------------------|-------------------------------------------------------------------------------------------------------------------------------------------------------------------------------------------------------------------------------------------------------------------------------------------------------------------------------------------------------------------------------------------------------------------------------------------------------------------------------------------------------------------------------------------------------------------------------------------------------------------------------------------------------------------------------------------------------------------------------------------------------------------------------------------------------------------------------------------------------------------------------------------------------------------------------------------------------------------------------------------------------------------------------------------------------------------------------------------------------------------------------------------------------------------|
| Journal:                      | <i>BMJ Open</i>                                                                                                                                                                                                                                                                                                                                                                                                                                                                                                                                                                                                                                                                                                                                                                                                                                                                                                                                                                                                                                                                                                                                                   |
| Manuscript ID                 | bmjopen-2021-054946                                                                                                                                                                                                                                                                                                                                                                                                                                                                                                                                                                                                                                                                                                                                                                                                                                                                                                                                                                                                                                                                                                                                               |
| Article Type:                 | Original research                                                                                                                                                                                                                                                                                                                                                                                                                                                                                                                                                                                                                                                                                                                                                                                                                                                                                                                                                                                                                                                                                                                                                 |
| Date Submitted by the Author: | 29-Jun-2021                                                                                                                                                                                                                                                                                                                                                                                                                                                                                                                                                                                                                                                                                                                                                                                                                                                                                                                                                                                                                                                                                                                                                       |
| Complete List of Authors:     | Rungreangkulkij, Somporn; Khon Kaen University Faculty of Nursing Ratinthorn, Ameporn; Mahidol University Faculty of Nursing Lumbiganon, Pisake; Khon Kaen University Faculty of Medicine, Obstetrics and Gynaecology<br>Zahroh, Rana; The University of Melbourne, Gender and Women's Health Unit, Centre of Health Equity, Melbourne School of Population and Global Health<br>Hanson, Claudia; Karolinska Institute, Public Health Sciences; London School of Hygiene and Tropical Medicine Faculty of Infectious and Tropical Diseases, Dept of Disease Control<br>Dumont, Alexandre; University of Paris, CEPED, Institute for Research on Sustainable Development, IRD-Université de Paris, ERL INSERM SAGESUD<br>de Loenzien, Myriam; Centre Population et Developpement, Betran, Ana Pilar; World Health Organization, 8. UNDP/UNFPA/UNICEF/World Bank Special Program of Research, Development and Research Training in Human Reproduction (HRP), Department of Sexual and Reproductive Health and Research<br>Bohren, Meghan ; University of Melbourne School of Population and Global Health, Gender and Women's Health Unit, Centre for Health Equity |
| Keywords:                     | OBSTETRICS, PUBLIC HEALTH, International health services < HEALTH SERVICES ADMINISTRATION & MANAGEMENT, Quality in health care < HEALTH SERVICES ADMINISTRATION & MANAGEMENT, QUALITATIVE RESEARCH                                                                                                                                                                                                                                                                                                                                                                                                                                                                                                                                                                                                                                                                                                                                                                                                                                                                                                                                                                |
|                               |                                                                                                                                                                                                                                                                                                                                                                                                                                                                                                                                                                                                                                                                                                                                                                                                                                                                                                                                                                                                                                                                                                                                                                   |

SCHOLARONE™  
Manuscripts

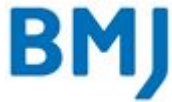

I, the Submitting Author has the right to grant and does grant on behalf of all authors of the Work (as defined in the below author licence), an exclusive licence and/or a non-exclusive licence for contributions from authors who are: i) UK Crown employees; ii) where BMJ has agreed a CC-BY licence shall apply, and/or iii) in accordance with the terms applicable for US Federal Government officers or employees acting as part of their official duties; on a worldwide, perpetual, irrevocable, royalty-free basis to BMJ Publishing Group Ltd ("BMJ") its licensees and where the relevant Journal is co-owned by BMJ to the co-owners of the Journal, to publish the Work in this journal and any other BMJ products and to exploit all rights, as set out in our [licence](#).

The Submitting Author accepts and understands that any supply made under these terms is made by BMJ to the Submitting Author unless you are acting as an employee on behalf of your employer or a postgraduate student of an affiliated institution which is paying any applicable article publishing charge ("APC") for Open Access articles. Where the Submitting Author wishes to make the Work available on an Open Access basis (and intends to pay the relevant APC), the terms of reuse of such Open Access shall be governed by a Creative Commons licence – details of these licences and which [Creative Commons](#) licence will apply to this Work are set out in our licence referred to above.

Other than as permitted in any relevant BMJ Author's Self Archiving Policies, I confirm this Work has not been accepted for publication elsewhere, is not being considered for publication elsewhere and does not duplicate material already published. I confirm all authors consent to publication of this Work and authorise the granting of this licence.

1  
2  
3 1  
4  
5  
6 2 **Factors influencing the implementation of labour companionship: formative qualitative**  
7  
8  
9 3 **research in Thailand**  
10

11  
12 4 **Authors:**

13  
14 5 Somporn Rungreangkulkij<sup>1</sup>  
15 6 Ameporn Ratinthorn<sup>2</sup>  
16 7 Pisake Lumbiganon<sup>3</sup>  
17 8 Rana Islamiah Zahroh<sup>4</sup>  
18 9 Claudia Hanson<sup>5, 6</sup>  
19 10 Alexandre Dumont<sup>7</sup>  
20 11 Myriam de Loenzien<sup>7</sup>  
21 12 Ana Pilar Betrán<sup>8</sup>  
22 13 Meghan A. Bohren<sup>4\*</sup>  
23  
24  
25

26 15 \* Corresponding author: Meghan A. Bohren meghan.bohren@unimelb.edu.au  
27  
28  
29 16

30 17 **Affiliations:**

- 31  
32 18 1. Faculty of Nursing, Khon Kaen University, Khon Kaen, Thailand  
33 19 2. Faculty of Nursing, Mahidol University, Bangkok, Thailand  
34 20 3. Department of Obstetrics and Gynaecology, Faculty of Medicine, Khon Kaen University, Khon  
35 21 Kaen, Thailand  
36 22 4. Gender and Women's Health Unit, Centre for Health Equity, School of Population and Global  
37 23 Health, University of Melbourne, Melbourne, Australia  
38 24 5. Department of Global Public Health, Karolinska Institutet, Stockholm, Sweden  
39 25 6. London School of Hygiene and Tropical Medicine, London, United Kingdom  
40 26 7. CEPED, Institute for Research on Sustainable Development, IRD-Université de Paris, ERL INSERM  
41 27 SAGESUD, Paris, France  
42 28 8. UNDP/UNFPA/UNICEF/World Bank Special Program of Research, Development and Research  
43 29 Training in Human Reproduction (HRP), Department of Sexual and Reproductive Health and  
44 30 Research, World Health Organization, Geneva, Switzerland  
45  
46  
47  
48  
49 31  
50  
51  
52  
53  
54  
55  
56  
57  
58  
59  
60

## 32 Abstract

### 33 Introduction

34 WHO recommends that all women have the option to have a companion of their choice throughout  
35 labour and childbirth. Despite clear benefits of labour companionship, including better birth  
36 experiences and reduced caesarean section, labour companionship is not universally implemented.  
37 In Thailand, there are no policies for public hospitals to support companionship. This study aims to  
38 understand factors affecting implementation of labour companionship in Thailand.

### 39 Methods

40 This is formative qualitative research to inform the “Appropriate use of caesarean section through  
41 QUALity DECision-making by women and providers” (QUALI-DEC) study, to design, adapt and  
42 implement a strategy to optimize use of caesarean section. We use in-depth interviews and  
43 readiness assessments to explore perceptions of healthcare providers, women, and potential  
44 companions about labour companionship in eight Thai public hospitals. Qualitative data were  
45 analysed using thematic analysis, and narrative summaries of the readiness assessment were  
46 generated. Factors potentially affecting implementation were mapped to the Capability,  
47 Opportunity, and Motivation behaviour change model (COM-B).

### 48 Results

49 127 qualitative interviews and eight readiness assessments are included in this analysis. The  
50 qualitative findings were grouped in four themes: benefits of labour companions, roles of labour  
51 companions, training for labour companions, and factors affecting implementation. The findings  
52 showed that healthcare providers, women, and their relatives, all had positive attitudes toward  
53 having labour companions. The readiness assessment highlighted implementation challenges related  
54 to training the companion, physical space constraints, overcrowding, and facility policies, reiterated  
55 by the qualitative reports.

### 56 Discussion

57 If labour companions are well-trained on how to best support women, help them to manage pain,  
58 and engage with healthcare teams, it may be a feasible intervention to implement in Thailand.  
59 However, key barriers to introducing labour companionship must be addressed to maximise the  
60 likelihood of success mainly related to training and space. These findings will be integrated into the  
61 QUALI-DEC implementation strategies.

## Strengths and limitations of this study

- Labour companionship has important benefits for the woman and baby, and is recommended by WHO. This is the first study to understand needs and preferences related to labour companionship, and map factors that might affect implementation of labour companionship in Thailand.
- We found that implementation of labour companionship is feasible if labour companions and health workers are well-trained on how to best support women and engage with one another. Addressing key barriers to introducing labour companionship can include changes to the physical environment, implementing facility-level policies on labour companionship, and context-specific solutions to minimise fears on lawsuits and infection.
- A key strength of our study is the triangulation of qualitative research and facility readiness assessments, and mapping of key factors affecting implementation of labour companionship to the COM-B model of behaviour change.
- Using the COM-B model to guide analysis, we show how to use our formative research findings to guide intervention design and support a systematic, targeted, and theory-based development of implementation strategies for labour companionship.
- While our research was conducted in eight public hospitals across different regions of Thailand, the findings may not be transferrable to all settings in Thailand, as most study hospitals were in urban settings with high caesarean section rates.

62

## 63 Introduction

64 Efforts to improve maternal health globally have shifted in recent years to improving quality of care.

65 A critical component of quality of care is the person's 'experience of care', which the World Health  
66 Organization (WHO) has defined as ensuring that all pregnant people are treated with respect and  
67 dignity, have effective communication with health workers, and access to emotional support that  
68 meets their needs (1). Within labour and childbirth care, supporting women to have a labour  
69 companion of their choice present is an effective way to improve women's experiences by providing  
70 respectful care and emotional support (2, 3). Labour companionship refers to a person of the  
71 woman's choice, who accompanies the woman continuously throughout labour and childbirth;  
72 typically this is the woman's partner or husband, friend or family member (4). Labour  
73 companionship empowers women in four key ways (4). Labour companions help to facilitate  
74 informational support by helping to communicate between the woman and health workers and  
75 helping women with non-pharmacological pain relief (4). Labour companions also act as advocates  
76 who speak up in support of the woman, and vocalising her needs and preferences (4). Labour  
77 companions provide practical support, such as providing massage, holding the woman's hand and  
78 encouraging her to mobilize (4). Lastly, labour companions provide emotional support by being a  
79 continuous presence, and praising and reassuring the woman (4).

80 Labour companionship has important benefits for the woman and baby. A Cochrane intervention  
81 review analysed the impact of continuous support for women during labour and childbirth from 26  
82 studies conducted with over 15,000 women in 17 countries, and found that women with continuous  
83 support were more likely to have a spontaneous vaginal birth, and less likely to report negative  
84 ratings of or feelings about their childbirth experience, or to have a caesarean birth (5). Women with  
85 labour companionship also have a shorter duration of labour and better five-minute Apgar scores for  
86 their babies. Based on this evidence, WHO recommends that all women have the opportunity to  
87 have a labour companion of their choice with them throughout labour and childbirth (3).

88 Despite clear evidence of benefit, implementation of labour companionship in health facilities across  
89 the world remains sub-optimal. A Cochrane qualitative evidence synthesis highlighted several factors  
90 affecting implementation, including women and health workers not recognizing the benefits of  
91 labour companionship, labour companionship viewed as a 'nice to have' but not essential service,  
92 physical space constraints on labour wards and thus difficulties to maintain privacy, and integrating  
93 labour companions into part of the care team (4).

## 94 Context of labour companionship in Thailand

95 In Thailand, labour companions are not typically allowed in most public and some private hospitals.  
96 Most public hospitals have a policy allowing women's relative to wait outside the labour room, with  
97 certain hours allocated to allow relatives or friends to visit the women in the labour room, typically  
98 during lunch or dinner time. Anecdotally, some reasons for not allowing labour companionship were  
99 the concern about infection risks (even prior to COVID-19) and maintaining the privacy of women,  
100 who normally share rooms, especially from other male companions. With increasing access to  
101 mobile phones, there are also emerging concerns about pictures and audio video recordings, which  
102 may be used in potential litigation case against medical teams. Similar to the results of the Cochrane  
103 review, a quasi-experimental study in eastern Thailand compared the effect of companionship on  
104 primiparous women's experiences and found that women with companionship were more satisfied  
105 with their childbirth experiences, but no significant difference on self-reported suffering or ability to  
106 cope with labour pain was found (6).

## 107 The QUALI-DEC Project

108 In the context of sustained growing caesarean section rates in Thailand, the Ministry of Health and  
109 other stakeholders are examining factors underlying the increase and interventions to optimize its  
110 use. The QUALI-DEC study: "Appropriate use of caesarean section through **QUALITY DEC**ision-making  
111 by women and providers" (7) aims to design, adapt and evaluate a multi-faceted strategy, for the  
112 appropriate use of caesarean section in Argentina, Burkina Faso, Thailand and Viet Nam. The QUALI-  
113 DEC strategy is designed to combine four key components: 1) Opinion leaders to implement  
114 evidence-based clinical guidelines; 2) Caesarean audits and feedback to help providers identify  
115 potentially avoidable caesarean sections; 3) A Decision Analysis Tool (DAT) to help women make an  
116 informed decision on mode of birth; and 4) Implementation of WHO recommendations on  
117 companionship during labour and childbirth (7). The QUALI-DEC strategy for labour companionship  
118 supports the woman to choose any person to act as her labour companion. The QUALI-DEC research  
119 team and local implementation partners including opinion leaders will co-develop a tailored model  
120 for labour companionship in each setting that includes information on 1) changing hospital policy to  
121 allow for labour companionship, 2) establishing eligibility criteria for women and companions, 2)  
122 identifying how health workers can help women to choose and train the labour companion, 3)  
123 defining how health workers engage with women and companions, how many companions are  
124 allowed, and when they are present, 5) designing modifications for the physical space to  
125 accommodate companions, and 6) developing educational tools for companions on how to support  
126 women. Based on the formative research conducted among the local stakeholders in Thailand, the



1  
2  
3 127 aim of this paper is to describe the needs and preferences related to labour companionship, and to  
4  
5 128 map factors that might affect implementation of labour companionship in Thailand, using a  
6  
7 129 behaviour change model.  
8

## 9 130 **Methods**

11  
12 131 This is a formative qualitative study using in-depth interviews (IDIs) and a readiness assessment,  
13  
14 132 described in detail in the study protocol (8) and below. Eight hospitals in Thailand were purposively  
15  
16 133 selected for the QUALI-DEC project according to the willingness to participate, programmatic  
17  
18 134 activities, country priorities, and geographical representation (Table 1). The formative research was  
19  
20 135 conducted in these eight hospitals, where caesarean section rate ranged from 34.3-56.9%.

### 21 136 **Participants and recruitment**

23  
24 137 Five groups of participants were identified for this study: pregnant women, postpartum women,  
25  
26 138 potential companions (before birth), potential companions (after birth), and healthcare providers  
27  
28 139 (doctors, nurse-midwives) and administrators or managers. Pregnant women and postpartum  
29  
30 140 women aged 18 to 49 years who attended antenatal and/or postnatal care at the study hospitals  
31  
32 141 were invited to participate in in-depth interviews (IDIs), aiming for diversity (mix of urban or rural  
33  
34 142 residence, parity, age, and ethnicity - target per facility: 2-3 pregnant and 2-3 postpartum women).  
35  
36 143 Initially, nurse-midwives explored the interest of women during antenatal care or postnatal care  
37  
38 144 visits. If they were potentially interested in participating, then the research team approached  
39  
40 145 women face-to-face. The pregnant and postpartum women who participated in the study identified  
41  
42 146 a person who they would have liked to be their labour companion ("potential companion"), and the  
43  
44 147 research team approached the potential companions face-to-face to participate in an IDI (target per  
45  
46 148 facility: 2-3 potential companions before birth and 2-3 after birth). Typically, the potential  
47  
48 149 companion was already on the hospital grounds. Healthcare providers working on the antenatal,  
49  
50 150 delivery and postnatal wards of the study hospitals and healthcare administrators were contacted by  
51  
52 151 the research team and invited to participate in IDIs, with considerations for a diverse group based on  
53  
54 152 age, gender and years of working experience (target per facility: 2-3 nurse-midwives, 2-3 doctors, 2  
55  
56 153 administrators). We prespecified the target sample size for each type of participant to account for  
57  
58 154 the variable contexts and patient populations in each facility. No participants approached refused to  
59  
60 155 participate.

## 156 Data collection

157 After agreeing to participate and completing a consent form, the research team conducted IDIs in  
158 Thai at the respective health facility. IDIs lasted 30-90 minutes, had no other people present, were  
159 audio-recorded, and participants received 500 Baht (USD\$16) compensation for their time. General  
160 conversation was initiated prior going to main interview questions to build rapport. Data were  
161 collected from July to October 2020. All audio recordings were transcribed verbatim in Thai,  
162 complemented with field notes. De-identified transcripts were stored on a password protected  
163 computer. There was no further contact with the research participants after the IDI.

164 The interview guides were developed based on the implementation challenges identified in the  
165 Cochrane qualitative review (4) and covered a range of topics including: 1) values and needs around  
166 the childbirth period, 2) prenatal education, 3) preferences and decision-making processes regarding  
167 mode of birth, and 4) labour companionship (Appendix X: interview guide). Interview guides were  
168 piloted and refined prior to data collection. This analysis focuses on the labour companionship  
169 module, which included questions such as: Did you want someone to stay with you/women during  
170 labour and birth? Why or why not? Who should be the companion? What could their roles be and  
171 what are your expectations for them? What type of information or training may they need? What  
172 are the potential challenges, opportunities and suggestions related to implementing labour  
173 companionship?

174 In addition to IDIs, a readiness assessment was conducted to describe and assess the service delivery  
175 context ahead of the intervention implementation, and was carried out concurrently with the IDIs  
176 (Appendix X: readiness assessment). The readiness assessment provides a systematic approach to  
177 assessing readiness to engage in the implementation, in order to inform and tailor the interventions  
178 in a way best suitable to the local context (8). Readiness assessments were conducted by the  
179 research team in each of the study hospitals. During data collection, the researchers used a semi-  
180 structured form to observe the service delivery context in each facility setting related to possibility  
181 or barriers for companionship implementation such as the sign for visiting information, physical  
182 environment in latent room, labour room, and post-partum room (8).

## 183 Reflexivity

184 The QUALI-DEC research team consists of Thai and international social scientists, nurses, doctors,  
185 and epidemiologists with maternal health expertise. The research team believed that labour  
186 companionship is beneficial for women and families, and may help reduce caesarean section rates.

1  
2  
3 187 The research team was aware of their assumptions and mindful through the study process to  
4  
5 188 mitigate any potentially negative biases that could influence participant responses or interpretations  
6  
7 189 of responses. Six members of research team conducted the IDIs, all were female nursing professors  
8  
9 190 with extensive qualitative experience, no prior relationship with any participants, and did not work  
10 191 at the study sites. Prior to starting data collection, the research team underwent a three-day training  
11 192 on caesarean section globally and in Thailand, QUALI-DEC project, and data collection and  
12  
13 193 management.

## 14 15 16 194 Data analysis

17  
18 195 Thematic analysis was performed by hand according to the following steps: organizing the data;  
19  
20 196 generating categories, themes, patterns; testing emergent hypothesis; searching for alternative  
21  
22 197 explanations (9). Four members of the research team were involved in the data analysis. Initially, the  
23  
24 198 researchers repeatedly read the interview transcripts to develop initial codes of the data. Secondly,  
25  
26 199 the researchers conducted a systematic identification of themes from the codes such as support,  
27  
28 200 being a representative, and shorten labour. Thirdly, from the themes and codes, researchers identify  
29  
30 201 emerging patterns from the data, such as benefit of having labour companion. Lastly, the  
31  
32 202 researchers review the coded data extracts for each theme to consider whether they appear to form  
33  
34 203 a coherent pattern. If we found inadequacies in the initial coding and themes, we revisit the themes  
35  
36 204 again and changed when they needed. For trustworthiness, during data analysis the findings were  
37  
38 205 discussed among the research team and emergent findings were presented to the representative  
39  
40 206 obstetrician (QUALI-DEC opinion leader) from the study settings. Key themes emerging from the IDIs  
41  
42 207 were combined with data from the Readiness Assessment to identify and prioritize barriers, and to  
43  
44 208 develop potential implications for implementation. Data analysis was conducted in Thai in order to  
45  
46 209 retain the original meaning, and excerpts from the interview transcripts in this article were  
47  
48 210 translated by a bilingual Thai-English translator who is a member of the research team.

49  
50 211 The research findings were then conceptualised as factors potentially affecting implementation, and  
51  
52 212 mapped to the Capability, Opportunity, and Motivation model of behaviour change (COM-B) (10).  
53  
54 213 The COM-B model theorises that for a desired behaviour to occur (e.g. labour companionship),  
55  
56 214 individuals must have the capability, oppportunity, and motivation to enact the behaviour. Capability  
57  
58 215 refers to factors such as attention, decision-making, knowledge, and skills (10). Opportunity refers to  
59  
60 216 how environments influence behaviour, and includes both physical (e.g. access to supplies and  
217  
218 resources, staffing, infrastructure) and social (e.g. team-work, support, practice norms, social and  
219  
220 professional identities) contexts (10). Motivation refers to the internal processes that direct and  
encourage behaviours to occur or not, and includes factors such as perceived benefits, risks and

1  
2  
3 220 consequences, emotions, and priorities (10). The COM-B model has been widely used in  
4  
5 221 implementation research to improve implementation and to explore barriers and facilitators to  
6  
7 222 changing clinical practice. By identifying factors (e.g. barriers and facilitators) that may affect  
8  
9 223 implementation, teams can then design implementation strategies to address these factors and, in  
10  
11 224 turn, optimise the likelihood of successful implementation and potential for scale-up.

### 12 13 225 Ethical considerations

14 226 This research was approved by the Thai Central Research Ethics Committee (CREC) (COA-  
15  
16 227 CREC020/2020), related university research ethics committees, and all hospital research ethics  
17  
18 228 committees. Scientific and technical approval was obtained from the WHO Human Reproduction  
19  
20 229 Programme (HRP) Review Panel on Research Projects (RP2), and ethical approval by the WHO Ethical  
21  
22 230 Review Committee (protocol ID, 004571) and the French Research Institute for Sustainable  
23  
24 231 Development. All participants provided written consent to participate and IDIs were conducted in a  
25  
26 232 private place with no other people present. There was no patient or public involvement in this study.

27 233 This paper is reported according to the consolidated criteria for reporting qualitative research  
28  
29 234 (COREQ) guidance (11).

### 30 31 235 Patient and public involvement

32 236 Patients and/or the public were not involved in the design, or conduct, or reporting, or  
33  
34 237 dissemination plans of this research.

### 35 36 37 238 Results

38  
39  
40 239 From the eight participating hospitals, a total of 127 IDIs are included in this analysis: 27 pregnant  
41  
42 240 women, 25 postpartum women, 16 potential companions, 8 facility administrators, 18 doctors and  
43  
44 241 33 nurse-midwives working in maternity care. **Table 2** presents the sociodemographic characteristics  
45  
46 242 of women and potential companions. Pregnant and postpartum women's ages ranged from 18 to 42  
47  
48 243 years, almost all were married or cohabitating with a partner, and most were employed. Among  
49  
50 244 pregnant women, about half were nulliparous, including two women who had planned for a  
51  
52 245 caesarean birth. The other half were multiparous. Among postpartum women, at their most recent  
53  
54 246 birth, 32% (8/25) had a vaginal birth, and 68% (17/25) had a caesarean birth. Almost all potential  
55  
56 247 companions identified by the women were their husbands, except one who was the woman's  
57  
58 248 mother.

59 249 **Table 3** presents the sociodemographic characteristics of healthcare providers. There were 12 men  
60  
250 (doctors and administrators) and 59 women (14 female doctors/administrators; all nurse-midwives

1  
2  
3 251 were women). About two-thirds of doctors were working in their professions (12/18) and study  
4  
5 252 facility (11/18) for 10 or fewer years. Compared to doctors, nurse-midwives were working in their  
6  
7 253 profession and study facility for longer (more than 10 years).

## 9 254 Contextual insights from the Readiness Assessment

10  
11 255 Observations of the eight hospitals during the readiness assessment demonstrated space limitations  
12  
13 256 and crowding on the labour ward, typically with multiple beds in the same room, close together and  
14  
15 257 only divided by a curtain. Key challenges to introducing labour companionship will thus be  
16  
17 258 overcrowding of the labour ward and maintaining privacy.

18  
19 259 There are differences in current visiting hours in the labour and delivery wards across the hospitals.  
20  
21 260 Two hospitals (hospitals 5 and 6) limit the visiting hours to three times a day, 1-2 hours in the  
22  
23 261 morning, noon, and evening. In contrast, the five other hospitals allow visitors from 11 AM- 8 PM,  
24  
25 262 but with limits on the number of visitors and duration of visits. Almost all hospitals allow only one  
26  
27 263 visitor to visit for 15-20 minutes at a time. There is only one hospital (hospital 8) that allows woman  
28  
29 264 who are in labour to visit the relatives at the ward reception area until 8 PM. The restrictions on the  
30  
31 265 timing of visitations and number of visitors allowed may challenge the implementation of labour  
32  
33 266 companionship, and may need to be adjusted prior to implementation to ensure that companions  
34  
35 267 are not subjected to visitor restrictions.

36  
37 268 Two hospitals (hospitals 5 and 6) provide onsite overnight accommodation for relatives. One hospital  
38  
39 269 (hospital 2) provides accommodation to the relatives only if the woman in labour is under 20 years  
40  
41 270 old. In addition, two hospitals (hospitals 1 and 8) have a room for the relatives to be with the woman  
42  
43 271 in labour until after the birth for extra charge.

44  
45 272 Discussions between the research team and clinical staff as part of the readiness assessment  
46  
47 273 suggested that a potential solution for seven hospitals would be to implement labour  
48  
49 274 companionship for some, but not all women. For example, if seven women are in labour at the  
50  
51 275 same time, labour companionship could be piloted with approximately two or three women  
52  
53 276 without compromising care for all women. In these hospitals, it may be possible to make more  
54  
55 277 private space for women during labour, for example by moving a woman who is in active labour  
56  
57 278 to the corner of the ward and using curtains that are already available. Hospital 5 had serious  
58  
59 279 concerns regarding the seriously limited space that might challenge the implementation of labour  
60  
61 280 companionship.

## 281 Qualitative findings related to labour companionship

282 The findings showed that, in general, healthcare providers, women, and potential companions had  
283 positive attitudes about labour companionship. The qualitative findings are grouped in four  
284 categories in the subsequent sections: 1) benefits of labour companions, 2) the roles of labour  
285 companions, 3) training for labour companions, and 4) factors affecting implementation.

### 286 1.0 Benefits of labour companions

287 Women, companions, and health workers expressed the benefits of having labour companions,  
288 including 1) support, warmth and improved marital relationship, 2) having a representative to  
289 communicate with the medical team, and 3) perception of clinical benefits. They have noticed the  
290 benefits of having the companion included shorten labour duration, to reduce caesarean section, to  
291 understand the work of medical team, to reduce the nurse-midwife's workload by being the  
292 woman's emotional supporter, and to provide opportunity for professional development. These  
293 benefits are outlined in the following sections. Recognition of the benefits of labour companionship  
294 are important facilitators for the *reflective* and *automatic motivation* domains of behaviour change,  
295 as they refer to the conscious thought processes (plans, evaluations) and habits or desires that  
296 influence motivation.

#### 297 1.1 Support, warmth and improved marital relationship

298 Many women expressed that they feel anxious during the labour and birth. They feared the labour  
299 and birth process in the unfamiliar hospital environment. They experienced pain from contractions  
300 and worried about their safety and the baby's health. These women believed that having a  
301 companion might reduce fear and anxiety:

302 *It is very nice to have some support. Some people need emotional support, wanting to have*  
303 *some familiar faces around. They looked around - they saw only the strangers. If they could*  
304 *see the mom or the husband, they would have felt some support that at least they have a*  
305 *friend. Having companions is very beneficial.*

306 (Labour nurse-midwife 4, 7-years work experience, hospital 4)

307 *It's good to have a companion...have someone to talk to while waiting...I would have felt*  
308 *relaxed...But if I were to have someone with me, I would have felt less anxious and forgot the*  
309 *pain a little bit.*

310 (Postpartum woman 4, 35 years, hospital 4)

1  
2  
3 311 The participants from all groups said that having a labour companion present during the woman's  
4 312 labour and birth could improve the marital relationship if the husband was chosen to be a  
5 313 companion. The husband and wife could go through the experience of the labour pain, emotional  
6 314 journey together.

7  
8  
9  
10 315 *Having my husband as a companion was very good. It's a very good bonding experience*  
11 316 *before the baby arrives. It's better for our family relationship.*

12  
13  
14 317 (Postpartum woman 10, 23 years, hospital 5)

15  
16  
17 318 *One of the good things about having the companion is that we can support and consult*  
18 319 *with each other. We can go through it and help each other along the way.*

19  
20  
21 320 (Husband 1, 29 years, hospital 8)

## 22 23 321 1.2 Representative to the medical team

24  
25  
26 322 Participants described how labour pain can affect the woman's decision-making, perceptions, and  
27 323 judgment. Therefore, having a companion during labour who was a family member could be useful  
28 324 to act as a representative to communicate with the medical team. This can improve effective  
29 325 communication of the women's needs and preferences.

30  
31  
32  
33 326 *Many times, the patients are in so much pain. We couldn't really communicate with*  
34 327 *them...They couldn't make sound decisions. If they have a relative who can be their*  
35 328 *representative, it improves the communication and decision making.*

36  
37  
38  
39 329 (Obstetrician 3, 10-years work experience, hospital 4)

40  
41 330 *Having a companion is a good thing. They can be my representative, if something is wrong.*  
42 331 *They can get a nurse for me.*

43  
44  
45 332 (Postpartum woman 4, 35 years, hospital 4)

## 46 47 333 1.3 Perception of clinical benefits

48  
49  
50 334 Some healthcare providers believed that if women had good support, they would be able to manage  
51 335 their pain which, in turn, seem to help shorten the labour duration.

52  
53  
54 336 *One of the good things about having the companion is the smooth delivery...For example if*  
55 337 *the mom is with the patient, the mother might be able to support because the mother has*  
56 338 *experienced labour before. They can help the patient to follow the medical team's teaching*  
57 339 *like how to push correctly. The partner can help guide the patient to a successful labour.*

340 (Obstetrician-Administrator 2, 30-years work experience, hospital 4)

341 Moreover, some healthcare providers believed that when the women had good support, they may  
342 manage the pain better than if they did not have a companion. This could result in fewer caesarean  
343 births, as some women ask for caesarean because they no longer wish to tolerate the labour pain.

344 *Having a companion with the woman seems to help with the surgery request [for caesarean  
345 section]. When the women are in labour pain, they will have someone with them to distract  
346 from the pain.... Many cases they ask for surgery because they are experiencing labour pain  
347 and don't want to wait until the natural delivery.*

348 (Obstetrician 1, 11-years work experience, hospital 7)

#### 349 1.4 Labour companions at witnesses

350 When the women's relatives stay with them throughout labour, they can witness the work of  
351 medical personals directly. Healthcare workers described that when family members are present,  
352 they tended to be more careful while working, which may therefore improve service quality.

353 *It is like the companions are the quality assurance inspectors. They see how our system  
354 works. It is like a two-way communication that we can improve the quality of our service.*

355 (Labour nurse-midwife 13, 34-years work experience, hospital 6)

356 Healthcare workers also felt the presence of companions could reduce some misunderstanding  
357 about medical malpractice, as the companion could witness and understand the work of the medical  
358 team which may lead to fewer lawsuits.

359 *It's beneficial to have a labour companion. If there are any complications during the labour  
360 and the delivery, they will see that we try our best. When they see that we are trying the best  
361 we can, that might reduce the lawsuits. They have witnessed that we do pay attention. They  
362 can participate in the care.*

363 (Obstetrician 2, 3-years work experience, hospital 7)

#### 364 1.5 Reduce the nursing workload in emotional support

365 One of the nursing roles is providing emotional support to women during labour. The nurse-  
366 midwives also monitor frequency of contractions and provide other nursing care. When there are  
367 many women in labour, the nurse-midwives might not be able to provide close attention to every  
368 woman, and emotional support in particular can be compromised. Having a labour companion who



1  
2  
3 369 has been trained on how to support women could therefore potentially reduce the nursing  
4  
5 370 workload.

6  
7 371 *It helps reducing my workload.....I try to pay close attention to all my patients. I can do that*  
8  
9 372 *when I have only a few patients. But when the patient has a labour companion, I feel good*  
10  
11 373 *that my patients do receive intensive care, even though it's from the companion, not me.*

12  
13 374 (Labour nurse-midwife 14, 10-years work experience, hospital 6)

## 14 15 375 1.6 Labour companion may not be helpful

16  
17  
18 376 Most participants expressed the benefits of having labour companions. However, there were four  
19  
20 377 women who said that they did not need a labour companion, primarily because they believed that  
21  
22 378 during labour, nobody could help alleviate pain. These women believed that during labour, women  
23  
24 379 tended to have limited attention and negative moods.

25 380 *Either way is fine with me, having a companion or not. I am in labour. I will feel pain, no*  
26  
27 381 *matter I have someone with me or not. Having a companion isn't helping with my pain.*

28  
29 382 (Pregnant woman 13, 31 years, hospital 5)

30  
31 383 Moreover, one husband also said it was not helpful for him to be there. He said it is better for the  
32  
33 384 woman to be with the medical team, and feared to see her suffer.

34  
35 385 *I think I will not be a labour companion. I will wait outside the room. I don't want to be in the*  
36  
37 386 *way of the medical team. I am worried but I don't want to see her crying and suffering.*

38  
39 387 (Husband 3, 42 years, hospital 3)

## 40 41 42 388 2.0 The roles of labour companion

43  
44 389 Most healthcare workers said that the women should be the one who select their labour companion.  
45  
46 390 Most women preferred their husbands to be their labour companions, as they think that it will  
47  
48 391 enhance the family relationship, and a few women preferred their mothers as they viewed their  
49  
50 392 mothers' own labour experiences to be beneficial in supporting them. The participants from all  
51  
52 393 groups expressed the roles of the labour companion very similarly, to provide emotional support,  
53  
54 394 massage and support coping with pain, assisting with daily activities, and communicating with the  
55  
56 395 medical team.

1  
2  
3 396 *I would like someone who can be around and help out. Someone who holds me when I am in*  
4  
5 397 *pain. Someone who can help getting things for me when I can't really help myself. It is better*  
6  
7 398 *than being alone.*

8  
9 399 (Pregnant woman 10, 38 years, hospital 2)

10  
11 400 The health workers also perceived that labour companions could play key roles in supporting them  
12  
13 401 to better care for the women in labour.

14  
15 402 *The first thing is to be my support. Other duties can be understanding the labour and delivery*  
16  
17 403 *process. So that person isn't in panic. If they notice any unusual symptoms, they can alert*  
18  
19 404 *the medical team. They should have the ability to observe and report any abnormality. I see*  
20  
21 405 *this person as a censor who detects problems.*

22  
23 406 (Obstetrician-Administrator 5, 20-years work experience, hospital 7)

24  
25 407 *I want to teach and train the companion. They should learn how to assess the labour pain,*  
26  
27 408 *where they can check or touch. They will be the one who communicates with the nurses that*  
28  
29 409 *the contraction is more frequent and intense. They can tell the nurses that the patient wants*  
30  
31 410 *to push already.*

32  
33 411 (Labour nurse-midwife 15, 5-years work experience, hospital 6)

34  
35 412 If labour companions were trained, for example during childbirth education classes or antenatal  
36  
37 413 visits, these health workers believed that they could help the woman to manage pain, and  
38  
39 414 communicate to the health workers if the woman needs help or is ready to push.

40  
41 415 These critical roles played by labour companions are important facilitators to the *psychological*  
42  
43 416 *capability* domain of behaviour change, which can influence the relationship between motivation  
44  
45 417 and enacting the behaviour (labour companionship). If labour companions are appropriately  
46  
47 418 equipped with the skills and knowledge to support women during labour, then they in turn have  
48  
49 419 increased motivation, and health workers may feel better able to integrate them into the care team.

### 50 420 3.0 Training the labour companion

51  
52 421 Participants expressed that potential labour companions should receive training to understand the  
53  
54 422 process of labour and how to best support the woman. Preparation of the labour companions could  
55  
56 423 be integrated into the existing antenatal classes.

57  
58 424 *They have to pass some trainings, including both the woman and the companion. The labour*  
59  
60 425 *companion should attend some preparation courses. So they know what to do, how to help*

1  
2  
3 426 *the woman, how to give massage, etc. There has to be a curriculum that prepare the women*  
4  
5 427 *and the relatives about the labour, what's going to happen while waiting before the delivery,*  
6  
7 428 *how much the pain, how to prepare, and what to prepare.*

8  
9 429 (Labour nurse-midwife 3, 11 -years work experience,  
10  
11 430 hospital 4)

12  
13 431 Most participants agreed that the training and preparation for the labour companion should start in  
14  
15 432 the third trimester, approximately week 32 of the pregnancy. They should attend the class at least  
16  
17 433 two times, for about 30-60 minutes.

18  
19 434 *At least they should attend the classes twice. The first time can be when they come to get the*  
20  
21 435 *lab result after the first or second prepartum visit. But definitely after week 32, the labour*  
22  
23 436 *companion can attend the ongoing "smart-mom" class. They have to attend at least 2*  
24  
25 437 *classes.*

26 438 (Labour nurse-midwife 16, 16-years work experience, hospital 3)

27  
28 439 The key content and skills for labour companions to learn during these sessions is how to provide  
29  
30 440 emotional support, pain management techniques, and understanding the process of labour. One  
31  
32 441 female participant said that the labour companion should understand the emotions while the  
33  
34 442 woman is going through labour pain so they can support the woman appropriately.

35  
36 443 *The labour companion has to learn how to support the patient. We should teach them what*  
37  
38 444 *labour is and the pain associate to the labour, how much pain, when to report to the medical*  
39  
40 445 *team. For instance, if the patient's water broke, they have to let us know. If the patient*  
41  
42 446 *wants to push, they have to report.*

43 447 (Obstetrician 2, 3-years work experience, hospital 7)

44  
45 448 *They have to learn the labour process. It will be somewhat a long process so they can help*  
46  
47 449 *with the pain while waiting for the delivery. They can be a pushing coach. They have to be*  
48  
49 450 *perceptive to our moods.*

50  
51 451 (Postpartum woman 24, 21 years, hospital 1)

52  
53 452 The husband of a pregnant woman echoed the desire for learning how to support his wife, and  
54  
55 453 particularly how he could help ease her pain during labour:

56  
57 454 *I want to learn what I should do, the process of getting on the labour and delivery wards,*  
58  
59 455 *what to do when I am on the ward, how I can help my wife with the pain.*  
60

456 (Husband 8, 35 years, hospital 1)

457 Appropriate training of the labour companion is an important facilitator to the *physical* and  
458 *psychological capability* domains of behaviour change, which can increase *motivation*.

#### 459 4.0 Factors affecting implementation

460 While all participants noted the many benefits to having a labour companion, some barriers and  
461 challenges to implementing companionship were identified. These factors affecting implementation  
462 are important barriers and facilitators to *physical* and *social opportunity*, as they relate to creating  
463 enabling physical environments and influencing positive sociocultural norms. Many labour and  
464 delivery wards in public hospitals are not designed to accommodate labour companions, as the  
465 wards are already crowded with women in labour. Consequently, four main barriers were identified  
466 by participants: 1) maintaining privacy and confidentiality, 2) increased risk of infection, 3) risk of  
467 lawsuits, and 4) perceived additional work for health workers to support companions. Maintaining  
468 privacy was already a challenge without labour companions, as the labour ward beds are close  
469 together, in a narrow and crowded room. In Thai culture, it is improper for women's bodies to be  
470 exposed. Therefore, if a labour companion is a male, it may create discomfort and awkwardness  
471 during this sensitive time.

472 *Our hospital is a public hospital, not a private one. When the patients in labour, waiting to*  
473 *deliver, they are in their bed with a curtain as a divider between beds. There is no privacy. It's*  
474 *difficult for me to work and to protect my patients' privacy. For example, I am trying to do*  
475 *the pelvic exam but the next bed has a husband accompany her. The voices can travel*  
476 *through. It's difficult to work.*

477 (Obstetrician 4, 2-years work experience, hospital 4)

478 In addition to the challenges of physical privacy, some participants also feared that having more  
479 visitors and relatives on the ward will be difficult for the medical team to protect the confidential  
480 information of patients.

481 *I am very afraid of the risk of the confidentiality violation. The companions might talk about*  
482 *other patients to other people. I am very worried about this.*

483 (Antenatal nurse-midwife 9, 21-years work experience, hospital 3)

484 Participants, particularly healthcare providers, expressed concerns about increased risks of infection,  
485 as the ward is usually crowded with women in labour. Adding the labour companion could lead to  
486 the increased risk of infection spread (referring to non-COVID-19 infection).

1  
2  
3 487 *I think it's kind of risky for the infection. People wear their normal clothing, not sterile. That*  
4  
5 488 *might increase the infection spread.*

6  
7 489 (Labour nurse-midwife 2, 3-years work experience, hospital 7)

8  
9 490 Healthcare providers expressed concern that the presence of a labour companion may lead to  
10  
11 491 misunderstanding and lawsuits. They worried that while they are providing care, the companions  
12  
13 492 might think that the medical team are disorganized and in chaos, and that people may post these  
14  
15 493 issues on social media. These misunderstandings and miscommunications had the potential to lead  
16  
17 494 to lawsuits.

18  
19 495 *When I am on duty, I have to be more careful. My co-workers also warn me about this. For*  
20  
21 496 *instance, I might be using my smartphone playing on my break but the relatives think I am*  
22  
23 497 *not helping the patient who are yelling from pain. If they record and pose on social media,*  
24  
25 498 *people see and misunderstand that I am not doing my job. Having a labour companion is like*  
26  
27 499 *a two way sword. It has good and bad points.*

28 500 (Labour nurse-midwife 14, 10-years work experience, hospital 6)

29  
30 501 Lastly, many of the study hospitals had high ratios of women to healthcare providers, and healthcare  
31  
32 502 providers feared that introducing companions to the ward may increase their workloads.

33  
34 503 *The objective of having a labour companion is to have someone to help us. But I doubt that*  
35  
36 504 *the person can really help me. I have to explain and communicate more. It will double the*  
37  
38 505 *communication times because I not only communicate with a patient, I have to communicate*  
39  
40 506 *with the relatives.*

41 507 (Labour nurse-midwife 6, 3-years work experience, hospital 2)

42  
43 508 For successful implementation of companionship, these barriers would need to be considered and  
44  
45 509 addressed in the implementation strategy. However, despite the barriers, the participants,  
46  
47 510 particularly healthcare providers, believed that the potential benefits of introducing labour  
48  
49 511 companionship would outweigh the risks, suggesting that labour companionship was highly  
50  
51 512 acceptable.

52  
53 513 *I think it's possible to implement the labour companion policy because of the substantial*  
54  
55 514 *benefits. It is easily acceptable. When there are many evidence-based research that show the*  
56  
57 515 *benefits of having the labour companion can reduce the active and the second phase of the*  
58  
59 516 *labour, they will change the policy and practice.*

60 517 (Obstetrician 8, 3-years work experience, hospital 5)

1  
2  
3 518 *If there is a policy to include the labour companion, I think it's possible to follow. They have*  
4  
5 519 *to provide the space. When the direct order comes to the hospital to do it, they will set up*  
6  
7 520 *more private space. I think it's possible. There shouldn't be any problems.*

8  
9 521 (Obstetrician-Administrator 1, 35-years work experience, hospital 7)

## 10 522 Understanding factors affecting implementation using the COM-B model

11  
12  
13  
14 523 **Figure 1** maps the potential factors affecting implementation from the qualitative interviews and  
15  
16 524 readiness assessment to the COM-B model of behaviour change. The defined behaviour is that all  
17  
18 525 women have the option to have a companion of their choice throughout labour and childbirth. To  
19  
20 526 optimise the likelihood for this behaviour to occur in the QUALI-DEC hospitals in Thailand, the  
21  
22 527 implementation strategies should ensure that the key barriers identified are addressed, and that the  
23  
24 528 facilitators are present and encouraged in all sites.

## 25 529 Discussion

26  
27  
28 530 We found that healthcare providers, women, and potential companions in eight public hospitals in  
29  
30 531 Thailand had generally positive attitudes towards having labour companions, and particularly belief  
31  
32 532 that labour companions would provide beneficial psychological and physical support for the women.  
33  
34 533 However, we identified some opportunities and threats in implementing labour companionship for  
35  
36 534 all women. Training the labour companion, for instance through childbirth education classes or  
37  
38 535 attendance at antenatal visits, was important to ensure that the companion knew how to support  
39  
40 536 the woman and understood what to expect during labour and birth. Limited physical space on the  
41  
42 537 labour wards, overcrowding, and multiple beds in the same labour room were major concerns to  
43  
44 538 introducing labour companionship. While policies at the hospital and national level do not currently  
45  
46 539 mention labour companionship, changes are more likely to be made at the hospital-level, and may  
47  
48 540 need to include changes to the visitation policies and where women's families are allowed on the  
49  
50 541 labour ward.

51  
52 542 A key facilitator related to the social opportunities is that historically in Thai culture, childbirth  
53  
54 543 occurred at home where the woman was surrounded by her family, and strong values and happiness  
55  
56 544 in welcoming a new family member. Introducing labour companionship for births occurring in health  
57  
58 545 facilities may therefore reflect the values and cultural appropriateness of having a woman's social  
59  
60 546 network supporting her during labour and birth. While there are important barriers to address,  
547  
548 namely around policies, training, and reorganisation of the physical environment for birth, social  
opportunities and psychological capabilities that value companionship are critical which appear to

1  
2  
3 549 be present in Thai culture. These facilitators and barriers are remarkably similar to an  
4  
5 550 implementation study conducted in public hospitals in Egypt, Lebanon, and Syria, where women and  
6  
7 551 families highly valued companion support, but health workers identified critical organisational  
8  
9 552 factors such as limited physical space, lack of training of companions, and limited policy engagement  
10  
11 553 as barriers to successful implementation (12, 13). The implementation study in Egypt, Lebanon, and  
12  
13 554 Syria used participatory engagement through engagement with hospital leaders, seminars with  
14  
15 555 healthcare providers, communications materials for companions, and changes to the physical space  
16  
17 556 (chairs for companions, curtains around beds, access to hot water and toilets, and disposable gowns  
18  
19 557 and nametags for companions) to address these barriers (12), which may also be a useful approach  
20  
21 558 to inform the QUALI-DEC implementation.

22  
23 559 Afulani and colleagues similarly explored women and health workers' perceptions of labour  
24  
25 560 companionship in a public maternity unit in rural Kenya, and identified similar facilitators to labour  
26  
27 561 companionship and roles that labour companions could play (14). In contrast to our findings, the  
28  
29 562 Kenyan study identified additional social barriers, including women's belief that companions cannot  
30  
31 563 help them, embarrassment to have a non-health worker see them during labour, and fears that the  
32  
33 564 labour companion would gossip about what they saw during the birth to others or that the labour  
34  
35 565 companion may abuse the woman during labour (14). While we did not identify these social barriers  
36  
37 566 to implementation, it is possible that particularly the embarrassment and fears of gossip and abuse  
38  
39 567 may be present in more rural areas of Thailand (all QUALI-DEC study hospitals are in urban areas and  
40  
41 568 therefore may not be as influenced by these factors present in smaller communities).

42  
43 569 Most women and companions believed a partner or husband to be the optimal companion, believing  
44  
45 570 that witnessing the pain and supporting during the difficult time could strengthen the family bonding  
46  
47 571 including the father and the baby, which was consistent with previous studies (4, 15). Only a few  
48  
49 572 women preferred her mother as a companion. This finding is different from other women in India  
50  
51 573 and Bangladesh, most those women wanted their mothers to be a companion (16, 17). Having a  
52  
53 574 female companion, especially a mother, could yield another benefit. This is because mother can  
54  
55 575 share her own experiences on childbirth, which could serve as encouragement to women. We note  
56  
57 576 that cultural and gender norms may influence the choice of a companion, and that ultimately the  
58  
59 577 woman herself should be the person who chooses who will support her.

60  
61 578 There are several key implications for research, practice, and implementation of the QUALI-DEC  
62  
63 579 study. We plan to use opinion leaders (influential and respected healthcare leaders who are  
64  
65 580 effective communicators, and identified by their colleagues or local authorities) at each study  
66  
67 581 hospital to help support implementation (7). Engaging with the opinion leaders about the benefits of

1  
2  
3 582 labour companionship and co-designing strategies to address barriers to implementation that are  
4  
5 583 feasible and acceptable in their clinical settings will be critical. We plan to engage with the opinion  
6  
7 584 leaders during an intensive, five-day pre-study training workshop, where we will present the results  
8  
9 585 of this formative research and engage to design strategies to optimise implementation (7). We  
10  
11 586 expect that at a minimum, some reorganisation of the physical space of the labour ward will be  
12  
13 587 needed, for example introducing chairs and supplying curtains where necessary. Likewise, some  
14  
15 588 facility policies may need to be adjusted to change restrictions on visiting hours for the labour ward  
16  
17 589 to ensure that companions are not subjected to visitor restrictions. More work will be needed to  
18  
19 590 explore how to engage with labour companions during the antenatal period, and information,  
20  
21 591 education, and communications materials will be developed to communicate how companions can  
22  
23 592 support women and how health workers can engage them in care.

24  
25 593 Our study had both limitations and strengths. While we aimed to include diverse public hospitals  
26  
27 594 across different regions of Thailand, the findings may not be transferable to all settings in Thailand,  
28  
29 595 including Southern Thailand where we could not include any hospitals. All study hospitals were in  
30  
31 596 urban settings and generally hospitals with relatively high caesarean section rates, so there may be  
32  
33 597 limited transferability to rural settings or settings with lower caesarean section rates. We collected  
34  
35 598 the data during the COVID-19 pandemic, which may have introduced additional barriers to  
36  
37 599 implementation around people's presence on the labour wards (during the data collection period  
38  
39 600 July to October 2020, there were typically less than 10 COVID-19 cases per day in Thailand). We note  
40  
41 601 that WHO COVID-19 clinical management guidance recommends that during the pandemic, all  
42  
43 602 women should have access to woman-centred, respectful care, including a companion of their  
44  
45 603 choice; this includes women with suspected, probably, or confirmed COVID-19 (18). Key strengths of  
46  
47 604 our study include triangulation of results from qualitative research and the facility readiness  
48  
49 605 assessment, and mapping of key factors affecting implementation to the COM-B model to guide  
50  
51 606 decision-making during QUALI-DEC intervention design and support a systematic, targeted, and  
52  
53 607 theory-based development of implementation strategies.

## 54 55 608 **Conclusion**

56  
57 609 Labour companionship is viewed by women, potential companions, and health workers as highly  
58  
59 610 beneficial and acceptable in the Thai context. If labour companions are well-trained on how to best  
60  
61 611 support women, help them to manage pain, and engage with healthcare teams, it may be a feasible  
62  
63 612 intervention to implement in the study hospitals. However, key barriers to introducing labour  
64  
65 613 companionship must be addressed to maximise the likelihood of success. This includes changes to  
66  
67 614 the physical environment in the labour ward to ensure that privacy can be adequately maintained



1  
2  
3 615 and that there is space for companions to comfortably support women. Facility-level policies may  
4  
5 616 need adjustment, particularly around visitation hours and where companions are not restricted.  
6  
7 617 Context-specific solutions may need to be developed to assuage health worker concerns about  
8  
9 618 potential misunderstandings, lawsuits, or reputational risks stemming from the introduction of  
10  
11 619 labour companionship. Health workers will also need training to understand how to engage with  
12  
13 620 labour companionships as part of a woman's care team, to minimise the risk of role encroachment  
14  
15 621 and understand how companionship can be mutually beneficial. These key findings will be  
16  
17 622 considered and deliberated on when developing the QUALI-DEC implementation strategies for  
18  
19 623 introducing labour companionship.  
20  
21  
22 624  
23  
24  
25  
26  
27  
28  
29  
30  
31  
32  
33  
34  
35  
36  
37  
38  
39  
40  
41  
42  
43  
44  
45  
46  
47  
48  
49  
50  
51  
52  
53  
54  
55  
56  
57  
58  
59  
60

For peer review only

## 626 Acknowledgements

627 We thank the woman, potential companions, and health workers for their valuable time, and are  
628 grateful to the social scientist team for their hard work in data collection: Nilubon Rujiraprasert,  
629 Sasitara Nuampa, Natthapat Buaboon, Waraluk Kittiwatanapaisan, and Dasavanh Bounmany.

## 630 Funding statement

631 This study is part of the QUALI-DEC-project which is co-funded by the European Union's Horizon  
632 2020 research and innovation programme under grant agreement No 847567, and by UNDP-UNFPA-  
633 UNICEF-WHO-World Bank Special Programme of Research, Development and Research Training in  
634 Human Reproduction (HRP), a cosponsored programme executed by the World Health Organization  
635 (WHO) in the Department of Sexual and Reproductive Health and Research (SRH). The contents of  
636 this article are solely the responsibility of the authors and do not reflect the views of the EU, UNDP,  
637 UNFPA, UNICEF, WHO or the World Bank.

## 638 Contributorship statement

639 SR, AR, PL, CH, AD, MdL, APB and MAB designed the study. SR, AR, and PL led data collection with  
640 support from CH, AD, MdL, APB and MAB. SR led data analysis with support from RZ and MAB. SR  
641 and MAB drafted the manuscript, and all authors reviewed the manuscript.

## 642 Data sharing statement

643 No additional data available.

## 644 Patient and public involvement

645 Patients and/or the public were not involved in the design, or conduct, or reporting, or  
646 dissemination plans of this research.

647

648

649

650

651

652 

## References

- 653 1. Tunçalp Ö, Were WM, MacLennan C, Oladapo OT, Gülmezoglu AM, Bahl R, et al. Quality of  
654 care for pregnant women and newborns-the WHO vision. *Bjog*. 2015;122(8):1045-9.
- 655 2. World Health Organization. Companion of choice during labour and childbirth for improved  
656 quality of care. World Health Organization; 2016 2016.
- 657 3. World Health Organization. WHO recommendations: intrapartum care for a positive  
658 childbirth experience. World Health Organization; 2018 2018. Report No.: 978-92-4-155021-5.
- 659 4. Bohren MA, Berger BO, Munthe-Kaas H, Tunçalp Ö. Perceptions and experiences of labour  
660 companionship: a qualitative evidence synthesis. *The Cochrane database of systematic reviews*.  
661 2019;3(3):Cd012449.
- 662 5. Bohren MA, Hofmeyr GJ, Sakala C, Fukuzawa RK, Cuthbert A. Continuous support for women  
663 during childbirth. *The Cochrane database of systematic reviews*. 2017;7(7):Cd003766.
- 664 6. Jaroensook C. Effects of Labor Support by a Female Relative on Suffering from Labor Pain,  
665 Coping with Labor Pain, and Satisfaction with Childbirth Experiences Among Primiparous Parturients.  
666 *The Journal of Faculty of Nursing Burapha University*. 2019;26(2):67-75.
- 667 7. Dumont A, Betrán AP, Kaboré C, de Loenzien M, Lumbiganon P, Bohren MA, et al.  
668 Implementation and evaluation of nonclinical interventions for appropriate use of cesarean section  
669 in low- and middle-income countries: protocol for a multisite hybrid effectiveness-implementation  
670 type III trial. *Implementation Science*. 2020;15(1):72.
- 671 8. Bohren MA, Opiyo N, Kingdon C, Downe S, Betrán AP. Optimising the use of caesarean  
672 section: a generic formative research protocol for implementation preparation. *Reproductive health*.  
673 2019;16(1):170.
- 674 9. Braun V, Clarke V. Using thematic analysis in psychology. *Qualitative Research in Psychology*.  
675 2006;3(2):77-101.
- 676 10. Michie S, Van Stralen MM, West R. The behaviour change wheel: a new method for  
677 characterising and designing behaviour change interventions. *Implementation science*. 2011;6(1):42.
- 678 11. Tong A, Sainsbury P, Craig J. Consolidated criteria for reporting qualitative research (COREQ):  
679 a 32-item checklist for interviews and focus groups. *International Journal for Quality in Health Care*.  
680 2007;19(6):349-57.
- 681 12. Kabakian-Khasholian T, Bashour H, El-Nemer A, Kharouf M, Elsheikh O, the Labour  
682 Companionship Study G. Implementation of a labour companionship model in three public hospitals  
683 in Arab middle-income countries. *Acta Paediatrica*. 2018;107(S471):35-43.
- 684 13. Kabakian-Khasholian T, El-Nemer A, Bashour H. Perceptions about labor companionship at  
685 public teaching hospitals in three Arab countries. *International journal of gynaecology and  
686 obstetrics: the official organ of the International Federation of Gynaecology and Obstetrics*.  
687 2015;129(3):223-6.
- 688 14. Afulani P, Kusi C, Kirumbi L, Walker D. Companionship during facility-based childbirth: results  
689 from a mixed-methods study with recently delivered women and providers in Kenya. *BMC  
690 pregnancy and childbirth*. 2018;18(1):150-.
- 691 15. Kabakian-Khasholian T, Portela A. Companion of choice at birth: factors affecting  
692 implementation. *BMC Pregnancy and Childbirth*. 2017;17(1):265.
- 693 16. Bangal V, Bayaskar V, Arjun A, Khan I, Thorat U. Opinions of pregnant women regarding  
694 desire and choice of labour companion. *Women's Health*. 2018;7.
- 695 17. Perkins J, Rahman AE, Mhajabin S, Siddique AB, Mazumder T, Haider MR, et al. Humanised  
696 childbirth: the status of emotional support of women in rural Bangladesh. *Sexual and Reproductive  
697 Health Matters*. 2019;27(1):228-47.
- 698 18. World Health Organization. Clinical management of COVID-19 patients: Living guidance.  
699 Geneva, Switzerland: World Health Organization; 2021.

## Figures and Tables

Table 1. Study sites in Thailand

| Hospital # | Region             | Type of hospital         | # of births per year (2020) | Caesarean section rate (2020) |
|------------|--------------------|--------------------------|-----------------------------|-------------------------------|
| Hospital 1 | Central Thailand   | Public hospital          | 4,431                       | 43.6%                         |
| Hospital 2 | Central Thailand   | Public hospital          | 4,605                       | 34.3%                         |
| Hospital 3 | Central Thailand   | Public teaching hospital | 5,203                       | 48.5%                         |
| Hospital 4 | Northeast Thailand | Public teaching hospital | 1,727                       | 42.5%                         |
| Hospital 5 | Northeast Thailand | Public hospital          | 4,756                       | 43.6%                         |
| Hospital 6 | Northeast Thailand | Public hospital          | 3,361                       | 49.2%                         |
| Hospital 7 | Northern Thailand  | Public hospital          | 5,025                       | 50.1%                         |
| Hospital 8 | Eastern Thailand   | Public hospital          | 3,268                       | 56.9%                         |

Table 2. Sociodemographic of participants: women and potential companions

|                                          | Pregnant women | Postpartum women | Potential companions |
|------------------------------------------|----------------|------------------|----------------------|
| <b>Total number of participants</b>      | 27             | 25               | 16                   |
| <b>Age (years)</b>                       |                |                  |                      |
| 18-24                                    | 8              | 4                | 0                    |
| 25-30                                    | 9              | 9                | 4                    |
| 31-42                                    | 10             | 12               | 10                   |
| 43-59                                    | 0              | 0                | 2                    |
| <b>Marital status</b>                    |                |                  |                      |
| Single                                   | 0              | 0                | 0                    |
| Married/cohabitating                     | 26             | 25               | 15                   |
| Divorced/widowed                         | 1              | 0                | 1                    |
| <b>Occupation</b>                        |                |                  |                      |
| Government officer                       | 3              | 2                | 0                    |
| Business owner                           | 8              | 5                | 5                    |
| Employed (other)                         | 8              | 11               | 10                   |
| Unemployed                               | 8              | 7                | 1                    |
| <b>Parity and planned mode of birth</b>  |                |                  |                      |
| Nulliparous (no planned CS)              | 10             | -                | -                    |
| Nulliparous (planned CS)                 | 2              | -                | -                    |
| Multiparous (no planned CS)              | 9              | -                | -                    |
| Multiparous (planned CS)                 | 6              | -                | -                    |
| <b>Mode of birth (most recent birth)</b> |                |                  |                      |
| Vaginal birth                            | -              | 8                | -                    |
| CS                                       | -              | 17               | -                    |

CS: caesarean section

Table 3. Sociodemographic of participants: health care providers

|                                        | Administrators | Doctors | Nurse-midwives |
|----------------------------------------|----------------|---------|----------------|
| <b>Total number of participants</b>    | 8              | 18      | 33             |
| <b>Gender</b>                          |                |         |                |
| Female                                 | 2              | 12      | 33             |
| Male                                   | 6              | 6       | 0              |
| <b>Years working in total</b>          |                |         |                |
| 1-5                                    | 0              | 7       | 8              |
| 6-10                                   | 0              | 5       | 2              |
| 11-15                                  | 0              | 2       | 1              |
| 16-20                                  | 1              | 2       | 5              |
| 21-25                                  | 0              | 1       | 5              |
| 26-30                                  | 4              | 1       | 4              |
| ≥ 31                                   | 3              | 0       | 8              |
| <b>Years working at study facility</b> |                |         |                |
| 1-5                                    | 0              | 11      | 10             |
| 6-10                                   | 0              | 1       | 5              |
| 11-15                                  | 0              | 3       | 4              |
| 16-20                                  | 1              | 2       | 4              |
| 21-25                                  | 0              | 0       | 4              |
| 26-30                                  | 4              | 1       | 3              |
| ≥ 31                                   | 3              | 0       | 3              |

1  
2  
3 **Figure 1. Mapping the factors affecting implementation of labour companionship in**

4 **Thailand to the COM-B model of behaviour change.** This figure maps the factors affecting labour  
5 companionship from the qualitative research findings and readiness assessment to the COM-B model of  
6 behaviour change. The COM-B model is a useful way to identify what changes need to occur for an  
7 intervention – such as companionship – to be effective. Developing implementation strategies that capitalise  
8 on the facilitators and address the barriers to capability, opportunity, and motivation is a critical next step for  
9 the QUALI-DEC project.  
10  
11  
12  
13

14 [insert figure 1 here]  
15  
16  
17

18 Footnote to figure 1:  
19

20 Data coming from: \* = women, † = labour companion, ‡ = doctors, § = nurse-midwives, R = readiness  
21 assessment  
22  
23  
24  
25  
26  
27  
28  
29  
30  
31  
32  
33  
34  
35  
36  
37  
38  
39  
40  
41  
42  
43  
44  
45  
46  
47  
48  
49  
50  
51  
52  
53  
54  
55  
56  
57  
58  
59  
60





## Appendix 1. In-depth interview guides

This file contains the in-depth interview guides for all participant groups in this study:

1. Pregnant women (page 2)
2. Postpartum women (page 6)
3. Potential companions before birth (page 11)
4. Potential companions after birth (page 15)
5. Health workers (page 19)

For peer review only

## In-depth interview: pregnant women

**Step 1:** Introduce yourself to the participant. Describe the purpose of the interview and how information will be used. Obtain oral/written consent.

**Step 2:** Ask the participant to identify herself. Interviewer: fill out the information below prior to beginning the interview.

**Step 3:** Conduct the interview. Please remember to audio record the interview.

Interview place: \_\_\_\_\_

Interview date: \_\_\_\_\_

Start time: \_\_\_\_\_

End time: \_\_\_\_\_

Interviewer name: \_\_\_\_\_

Interview identification: \_\_\_\_\_

### Participant information

Duration of current pregnancy (weeks/months, please label): \_\_\_\_\_

Age (years): \_\_\_\_\_

Marital status (Single, married/cohabitating, divorced, widowed): \_\_\_\_\_

Occupation (write in): \_\_\_\_\_

1  
2  
3 Part 1. Values and needs surrounding the childbirth period

- 4 1. What are some things you are doing to prepare for your birth?
- 5 a. Probe: who is helping you to prepare? How are they helping?
- 6
- 7
- 8 2. Thinking about your pregnancy, what are some of the things you value most? Why?
- 9 a. Probe: to keep yourself healthy?
- 10 b. Probe: to keep your baby healthy?
- 11
- 12 3. Thinking to the future about your birth, what are some of the things that are most important
- 13 to you?
- 14 a. Probe: What will you need from your doctors and midwives to make sure this
- 15 happens?
- 16 b. Probe: what will you need from your family to make sure this happens?
- 17 c. Where are you planning to give birth? Why?
- 18 i. Did anyone help you decide where to give birth? Who? How did they help?
- 19
- 20

21 Part 2. Prenatal education

- 22
- 23 4. Thinking about when you go to your antenatal care visits, what are some of the things that
- 24 are most important to you to learn about?
- 25 a. Probe: What are some of the most important things you have learned during
- 26 antenatal care? Why are they important?
- 27 b. Probe: How do you think antenatal care could be improved?
- 28 i. What do you think is missing from your antenatal care visits?
- 29 ii. Are there any things that you would remove or change during your antenatal
- 30 care visits?
- 31
- 32

33 Part 3. Preferences and decision-making processes regarding mode of childbirth

- 34 5. Could you tell me about the different ways that women can give birth?
- 35 a. Probe: How did you learn about these options?
- 36
- 37 6. What do you think about vaginal birth and caesarean section?
- 38
- 39 7. What do you think are some of the positive things about vaginal birth?
- 40 a. Probe: Why are these positive things?
- 41 b. Probe: How did you learn about these positive things?
- 42
- 43 8. What are some of the negative things about vaginal birth?
- 44 a. Probe: Why are these negative things?
- 45 b. Probe: How did you learn about these negative things?
- 46
- 47 9. What do you think are some of the positive things about caesarean section?
- 48 a. Probe: Why are these positive things?
- 49 b. Probe: How did you learn about these positive things?
- 50
- 51 10. What are some of the negative things about caesarean section?
- 52 a. Probe: Why are these negative things?
- 53 b. Probe: How did you learn about these negative things?
- 54
- 55 11. How did you learn about vaginal birth and caesarean section?
- 56
- 57
- 58
- 59
- 60

- 1  
2  
3  
4  
5  
6  
7  
8  
9  
10  
11  
12  
13  
14  
15  
16  
17  
18  
19  
20  
21  
22  
23  
24  
25  
26  
27  
28  
29  
30  
31  
32  
33  
34  
35  
36  
37  
38  
39  
40  
41  
42  
43  
44  
45  
46  
47  
48  
49  
50  
51  
52  
53  
54  
55  
56  
57  
58  
59  
60
12. How would you prefer to give birth? For example, caesarean or vaginal birth?
- Why do you prefer to give birth this way?
  - How important is it for you to give birth this way? Why?
  - Was anyone involved in helping you make a decision about how you prefer to give birth?
    - Probe: Will your (husband/partner) influence this decision? How?
    - Probe: Will your family influence this decision? How?
    - Probe: Will your friends influence this decision? How?
    - Probe: Will your doctor or midwife influence this decision? How?
    - Probe: Will the media influence this decision? How?
13. Do you feel like you have enough information to understand the options that you have for how to give birth? Why or why not?
- Probe: What other type of information about different modes of childbirth would you be interested to learn about?
  - At what point during your pregnancy would you like to receive this information?
14. Did you discuss your preference with your doctor or midwife? If so, what was the discussion like?
15. *A decision-analysis tool could help to educate women about their options for mode of birth and how to discuss their preferences with a doctor. Interviewer: show the woman the Vietnam decision analysis tool.*
- Would this type of tool be helpful to you? Why or why not?
  - What type of information would you like to have included?
  - This type of decision tool can be paper based like this example, or could be an application for a phone. Which of these options do you prefer and why?*
16. Pregnancy and childbirth are exciting times but can also be scary for some women. Is there anything that you are afraid or nervous of during your pregnancy? Why or why not?
- Note to interviewer: if they bring up fear of pain, then probe about what pain management technique they have learned about.*
- What about during your birth, is there anything that you are afraid of? Why or why not?
    - Have you spoken to your doctor or midwife about these fears? Why or why not? What did they tell you?
    - Have you spoken to anyone else about these fears?
      - If yes:*
        - Who did you speak to? Why did you choose to speak to this person?
        - What type of advice did they give you?
      - If no:* Do you plan to speak to anyone about these fears? Why or why not?
    - What do you think could be done to help reduce this fear for you?

#### Part 4. Labour companionship

17. What do you need in order to have a positive experience when you go to the hospital for childbirth?
- What type of support do you think you need during labour and childbirth?

1  
2  
3 *Interviewer read: A labour companion is a person of the woman's choice, who can help to provide*  
4 *emotional support to the woman during labour and childbirth. Typically, this person would be with*  
5 *the woman continuously throughout labour and childbirth. This person may be the woman's*  
6 *husband/partner, her mother, or a friend.*  
7

8 18. Do you think you will receive this type of support? Why or why not?  
9

10 19. Have you ever heard of someone providing this type of support?  
11

12 20. What do you think of this type of support?  
13

14 21. Do you know if labour companionship is allowed in the hospital you plan to give birth in?

15 e. *If labour companionship is not allowed:* What do you think are the reasons for  
16 not allowing a labour companion?  
17

18 f. Would you be allowed a labour companion if you requested it? Why or why not?  
19

20 g. In your opinion, what changes do you think the hospital could make in order to  
21 make it more comfortable for women to have a labour companion?  
22

23 22. Do you think you would want to have a labour companion for your upcoming birth? Why  
24 or why not?

25 h. What type of information or education would YOU need before deciding if you  
26 wanted to have a labour companion to support you?  
27

28 23. If you were to have a labour companion with you:

29 i. What would you expect from this person?  
30

31 j. When would you want this person to be with you in the hospital (probe: the  
32 whole time, only during labour but not during the birth, something else?)  
33

34 k. Who would you prefer this person to be? Why?  
35

36 l. When would you like to start talking to your labour companion about their role  
37 during your labour and childbirth?  
38

39 iii. Probe: at what month during your pregnancy?  
40

41 24. What type of information or education do you think a labour companion would need to  
42 be able to support you?  
43

44 *Thank you so much for your time. Is there anything else that you would like to share with me today*  
45 *about anything we talked about?*  
46  
47  
48  
49  
50  
51  
52  
53  
54  
55  
56  
57  
58  
59  
60

## In-depth interview: postpartum women

**Step 1:** Introduce yourself to the participant. Describe the purpose of the interview and how information will be used. Obtain oral/written consent.

**Step 2:** Ask the participant to identify herself. Interviewer: fill out the information below prior to beginning the interview.

**Step 3:** Conduct the interview. Please remember to audio record the interview.

Interview place: \_\_\_\_\_

Interview date: \_\_\_\_\_

Start time: \_\_\_\_\_

End time: \_\_\_\_\_

Interviewer name: \_\_\_\_\_

Interview identification: \_\_\_\_\_

### Participant information

Duration of current pregnancy (weeks/months, please label): \_\_\_\_\_

Age (years): \_\_\_\_\_

Marital status (Single, married/cohabitating, divorced, widowed): \_\_\_\_\_

Occupation (write in): \_\_\_\_\_

1  
2  
3  
4  
5 **Part 1. Values and needs surrounding the childbirth period**

6 25. Can you tell me about your recent birth?

- 7 a. Where did you give birth?  
8 b. Were you planning to give birth there? Why or why not?  
9 c. How did you make the decision about where to give birth?  
10 i. Who was involved in the decision about where to give birth?  
11 ii. Probe: Did you influence this decision? How?  
12 iii. Probe: Did your family or her family influence this decision? How?  
13 iv. Probe: Did your friends or her friends influence this decision? How?  
14 v. Probe: Did the doctor or midwife influence this decision? How?  
15 vi. Probe: Did the media influence this decision? How?

16  
17  
18 26. How did you feel about your overall experience of giving birth?

- 19 a. How would you describe your birth experience? Why?

20  
21  
22 27. Satisfaction

- 23 a. How satisfied are you with the type of care you received during labour and  
24 childbirth?  
25 b. Can you give me an example of something you are very satisfied with?  
26 c. Can you give me an example of something you are NOT satisfied with?

27  
28 28. How well do you feel that your healthcare provider respected your opinions about care  
29 during labour and childbirth?

- 30 a. Can you give me an example of a time when your healthcare provider respected  
31 your opinions about your care during labour and childbirth?  
32 i. How did this make you feel?  
33 b. Can you give me an example of a time when your healthcare provider did NOT  
34 respect your opinions about your care during labour and childbirth?  
35 i. Probe: Or, an example of a time during labour and childbirth when someone  
36 else was making decision without talking with you?  
37 1. How did this make you feel?  
38  
39  
40

41 **Part 2. Decision-making processes regarding mode of childbirth**

42 29. Could you tell me about the different ways that women can give birth?

- 43 a. Probe: How did you learn about these options?

44  
45 30. What about for your most recent birth – how did you give birth? For example, caesarean or  
46 vaginal birth?

- 47 a. Is this the way that you preferred to give birth? Why or why not?  
48 b. Probe: How did you come to give birth in this way?  
49 i. Probe: Did your (husband/partner) influence this decision? How?  
50 ii. Probe: Did your family influence this decision? How?  
51 iii. Probe: Did your friends influence this decision? How?  
52 iv. Probe: Did your doctor or midwife influence this decision? How?  
53 1. Did you discuss this decision with your doctor or midwife? If so,  
54 what was the discussion like?  
55 v. Probe: Did the media influence this decision? How?  
56  
57  
58

59 31. What do you think about vaginal birth and caesarean section?

- 60 a. What do you think are some of the positive things about vaginal birth?

- 1  
2  
3 i. Probe: Why are these positive things?  
4 ii. Probe: How did you learn about these positive things?  
5 b. What are some of the negative things about vaginal birth?  
6 i. Probe: Why are these positive things?  
7 ii. Probe: How did you learn about these positive things?  
8 c. What do you think are some of the positive things about caesarean section?  
9 i. Probe: Why are these positive things?  
10 ii. Probe: How did you learn about these positive things?  
11 d. What are some of the negative things about caesarean section?  
12 i. Probe: Why are these positive things?  
13 ii. Probe: How did you learn about these positive things?  
14  
15

16  
17 32. How did you learn about vaginal birth and caesarean section?

18  
19 33. Did you feel like you had enough information to understand the options that you had for  
20 how to give birth? Why or why not?

- 21 a. Probe: What other type of information about different modes of childbirth would  
22 you have been interested to learn about?  
23 b. At what point during your pregnancy would you like to receive this information?  
24

### 25 Part 3. Prenatal education

26  
27 34. Thinking back to your antenatal care visits, what were some of the things that were most  
28 important to you to learn about?

- 29 a. Probe: What are some of the most important things you have learned during  
30 antenatal care? Why are they important?  
31 b. Probe: How do you think antenatal care could be improved?  
32 i. What do you think was missing from your antenatal care visits?  
33 ii. Are there any things that you would remove or change during your  
34 antenatal care visits?  
35  
36  
37

### 38 Part 4. Decision-aids

39  
40 35. Where did you get most of the information to educate you about what to expect while  
41 giving birth?

- 42 a. What type of topics did you learn about?  
43 b. How well do you feel these educational materials prepared you to give birth? Why?  
44 i. Probe: can you give me an example of something that you felt very well  
45 prepared for?  
46 ii. Probe: can you give me an example of something that you did NOT feel well  
47 prepared for?  
48 c. Overall, how well prepared did you feel to give birth? Why?  
49  
50  
51  
52  
53  
54  
55  
56  
57  
58  
59  
60



- 1  
2  
3 36. Did you feel like you had sufficient time to talk to your doctor or midwife about any  
4 concerns that you had about labour and childbirth? Why or why not?  
5 a. Can you give me an example of a time when you felt that you were able to discuss  
6 your questions or concerns with your doctor or midwife?  
7 b. Can you give me an example of a time when you felt that you were NOT able to  
8 discuss your questions or concerns with your doctor or midwife?  
9  
10  
11 37. *A decision-analysis tool could help to educate women about their options for mode of birth*  
12 *and how to discuss their preferences with a doctor. Interviewer: show the woman the*  
13 *Vietnam decision analysis tool.*  
14 a. Would this type of tool be helpful to you? Why or why not?  
15 b. What type of information would you like to have included?  
16 c. This type of decision tool can be paper based like this example, or could be an  
17 application for a phone. Which of these options do you prefer and why?  
18  
19

## 20 Part 5. Labour companionship

- 21 38. Who was with you while you were in labour?  
22 a. Probe: was your husband/partner with you?  
23 i. If yes:  
24 1. What was he doing while you were in labour and giving birth?  
25 2. Was he in the room with you? Why or why not?  
26  
27 b. Probe: were any of your family members or friends with you?  
28 i. If yes:  
29 1. Who was with you?  
30 2. What were they doing while you were in labour and giving birth?  
31 3. Were they in the room with you? Why or why not?  
32  
33  
34 39. What type of support do you think that you need during labour and childbirth while in the  
35 facility?  
36 a. Did you feel that you were supported during labour and childbirth? Why or why not?  
37 b. Can you give me an example of when you did feel supported?  
38 c. Can you give me an example of when you did not feel supported?  
39 d. What could have been done to improve your experience of support during labour  
40 and childbirth?  
41 i. Probe: Why do you think this is important?  
42  
43  
44

45 *Interviewer to read: Some women have a person with them during labour and childbirth, and we call*  
46 *this person a "labour companion". A labour companion is typically a woman's husband, boyfriend,*  
47 *sister, mother, or friend, who stays with the woman throughout labour and childbirth. They help the*  
48 *woman by providing emotional support, praising her and reassuring her.*

- 49 40. What do you think about this type of support?  
50  
51 41. Would you have wanted someone to support you in this way during your labour and  
52 childbirth? Why or why not?  
53  
54  
55  
56  
57  
58  
59  
60

- 1  
2  
3  
4  
5  
6  
7  
8  
9  
10  
11  
12  
13  
14  
15  
16  
17  
18  
19  
20  
21  
22  
23  
24  
25  
26  
27  
28  
29  
30  
31  
32  
33  
34  
35  
36  
37  
38  
39  
40  
41  
42  
43  
44  
45  
46  
47  
48  
49  
50  
51  
52  
53  
54  
55  
56  
57  
58  
59  
60
42. Who would you want this person to be?
- Probe: your husband/partner? Why?
  - Probe: a sister or friend? Why?
  - Probe: a mother or mother-in-law? Why?
43. When would you want to have this person with you?
- Probe: all of the time during labour and childbirth?
  - Probe: only some of the time (e.g. only during labour, but not the birth)
44. How do you think having a labour companion might be helpful?
45. What are some challenges to having a labour companion?
46. Do you know if labour companionship is allowed in the hospital you gave birth in?
- If labour companionship is not allowed:* What do you think are the reasons for not allowing a labour companion in this hospital?
47. What changes do you think the hospital could make to make it more comfortable for women to have a labour companion?
48. Do you have any other comments or feedback about labour companionship?

*Thank you so much for your time. Is there anything else that you would like to share with me today about anything we talked about?*

### In-depth interview: partner / potential companion (before birth)

**Step 1:** Introduce yourself to the participant. Describe the purpose of the interview and how information will be used. Obtain oral/written consent.

**Step 2:** Ask the participant to identify herself. Interviewer: fill out the information below prior to beginning the interview.

**Step 3:** Conduct the interview. Please remember to audio record the interview.

Interview place: \_\_\_\_\_

Interview date: \_\_\_\_\_

Start time: \_\_\_\_\_

End time: \_\_\_\_\_

Interviewer name: \_\_\_\_\_

Interview identification: \_\_\_\_\_

#### Participant information

Relationship with pregnant woman: \_\_\_\_\_

Age (years): \_\_\_\_\_

Marital status (Single, married/cohabitating, divorced, widowed): \_\_\_\_\_

Occupation (write in): \_\_\_\_\_

#### Information on pregnant women

N° of women's interview: \_\_\_\_\_

Duration of current pregnancy: \_\_\_\_\_

1  
2  
3  
4  
5  
6  
7  
8  
9  
10  
11  
12  
13  
14  
15  
16  
17  
18  
19  
20  
21  
22  
23  
24  
25  
26  
27  
28  
29  
30  
31  
32  
33  
34  
35  
36  
37  
38  
39  
40  
41  
42  
43  
44  
45  
46  
47  
48  
49  
50  
51  
52  
53  
54  
55  
56  
57  
58  
59  
60

## Part 1. Values and needs surrounding the childbirth period

49. What are some things you are doing to prepare for your (wife/partner/daughter/sister...) birth?
- Probe: who is helping you to prepare? How are they helping?
50. Thinking about your wife/partner/sister pregnancy, what are some of the things you value most? Why?
- Probe: to keep her healthy?
  - Probe: to keep the baby healthy?
  - Probe: for yourself personally?
51. Thinking to the future about your (wife/partner/daughter/sister...) birth, what are some of the things that are most important to you?
- Probe: What will you need from your doctors and midwives to make sure this happens?
  - Probe: what will you need from your family to make sure this happens?
52. Place of birth
- Where is your (wife/partner/daughter/sister...) planning to give birth? Why?
  - How did she make the decision about where to give birth?
    - Did anyone help her make the decision about where to give birth? Who? How?

## Part 2. Decision-making processes regarding mode of childbirth

53. Could you tell me about the different ways that women can give birth?
- Probe: How did you learn about these options?
54. What do you think about vaginal birth and caesarean section?
- What do you think are some of the positive things about vaginal birth?
  - What are some of the negative things about vaginal birth?
  - What do you think are some of the positive things about caesarean section?
  - What are some of the negative things about caesarean section?
55. How would you prefer that your (wife/partner/daughter/sister...) gives birth? For example, caesarean or vaginal birth?
- Probe: Why do you prefer this way?
  - Does your (wife/partner/daughter/sister...) also prefer to give birth this way? Why or why not?
56. Did your (wife/partner/daughter/sister...) decide about how she will give birth? For example, caesarean or vaginal birth?
- Probe: Who makes this decision?  
(note: the decision about mode of birth has not yet been made, or if he/she responds that they don't know to question 7, please instead ask: "How do you think she would plan to make this decision?")
    - Probe: Did you influence this decision? How?
    - Probe: Did your family or her family influence this decision? How?
    - Probe: Did your friends or her friends influence this decision? How?
    - Probe: Did the doctor or midwife influence this decision? How?
    - Probe: Did the media influence this decision? How?

### Part 3. Prenatal education

57. Have you been to any antenatal care visits with your (wife/partner/daughter/sister...)? Why or why not?

- a. *If yes:* Thinking about when you went to the antenatal care visits, what are some of the things that are most important to you?
  - vi. Probe: What are some of the most important things you have learned during antenatal care? Why are they important?
  - vii. Probe: How do you think antenatal care could be improved?
  - viii. What do you think is missing from the antenatal care visits?
  - ix. Are there any things that you would remove or change during the antenatal care visits? What are they and why would you change?

58. Thinking about antenatal care visits, what are some of the things that are most important to you to learn about?

- a. Probe: What are some of the most important things you have learned during antenatal care? Why are they important?
- b. Probe: How do you think antenatal care could be improved?

### Part 4. Decision-aids

59. How did you learn about vaginal birth and caesarean section?

60. Do you feel like you have enough information to understand the options that women have for how to give birth? Why or why not?
- i. Probe: What other type of information about different modes of childbirth would you be interested to learn about?
  - ii. At what point during your (wife/partner/sister...’s) pregnancy would you like to receive this information?

61. Pregnancy and childbirth are exciting times but can also be scary. Is there anything that you are afraid of or nervous about pregnancy or childbirth? Why or why not?

- a. What about during the birth, is there anything that you are afraid of? Why or why not?
- b. *If yes:*
  - i. Have you spoken to anyone about these fears? Why or why not?
    1. *If yes:* What did they tell you?
    2. *If no:* Do you plan to speak to anyone about these fears? Why or why not?
  - ii. What do you think could be done to help reduce this fear for you?

### Part 5. Labour companionship

62. Do you plan to go to the hospital with your (wife/partner/daughter/sister...) when she gives birth? Why or why not?

63. If you do go to the hospital when your (wife/partner/ daughter/sister...) gives birth, what do you need in order to have a positive experience?

64. What type of support do you think your (wife/partner/ daughter/sister...) needs during labour and childbirth?

- a. Do you think she will receive this type of support? Why or why not?

1  
2  
3  
4 Interviewer read: *A labour companion is a person of the woman's choice, who can help to provide*  
5 *emotional support to the woman during labour and childbirth. Typically, this person would be with*  
6 *the woman continuously throughout labour and childbirth. This person may be the woman's*  
7 *husband/partner, her mother, or a friend.*

- 8  
9 65. Have you ever heard of someone providing this type of support?  
10  
11 66. What do you think of this type of support?  
12  
13 67. Do you know if labour companionship is allowed in the hospital your (wife/partner/  
14 daughter/sister...) plan to give birth in?  
15 a. *If labour companionship is not allowed:* What do you think are the reasons for not  
16 allowing a labour companion?  
17 b. Would your (wife/partner/sister...) be allowed a labour companion if she requested  
18 it? Why or why not?  
19  
20 68. Have you ever provided this type of support before? (If yes: Could you tell me more about  
21 this?)  
22  
23 69. Do you think your (wife/partner/ daughter/sister...) would want to have a labour companion  
24 for her upcoming birth? Why or why not?  
25  
26 70. If your (wife/partner/ daughter/sister...) were to have a labour companion with her, who do  
27 you think she would prefer this person to be? Why?  
28  
29 71. If your (wife/partner/ daughter/sister...) were to have a labour companion with her, what do  
30 you think she would expect from this person?  
31  
32 72. Would you be interested in being a labour companion to your (wife/partner/  
33 daughter/sister...)? Why or why not?  
34  
35 73. What would you need in order to be a good labor companion?  
36 a. What do you need from the woman?  
37 b. What do you need from the nurses and doctors?  
38 c. What do you need from the hospital?  
39  
40 74. What type of information or education do you think a labour companion would need to be  
41 able to support her?  
42 a. When during pregnancy do you think a woman or a nurse should start talking to a  
43 potential labour companion about their role during labour and childbirth?  
44  
45 75. In your opinion, what changes do you think the hospital could make in order to make it more  
46 comfortable for women to have a labour companion?  
47  
48  
49  
50  
51

52 *Thank you so much for your time. Is there anything else that you would like to share with me today*  
53 *about anything we talked about?*  
54  
55  
56  
57  
58  
59  
60

## In-depth interview: partner / potential companion (postpartum)

**Step 1:** Introduce yourself to the participant. Describe the purpose of the interview and how information will be used. Obtain oral/written consent.

**Step 2:** Ask the participant to identify herself. Interviewer: fill out the information below prior to beginning the interview.

**Step 2:** Conduct the interview. Please remember to audio record the interview.

Interview place: \_\_\_\_\_

Interview date: \_\_\_\_\_

Start time: \_\_\_\_\_

End time: \_\_\_\_\_

Interviewer name: \_\_\_\_\_

Interview identification: \_\_\_\_\_

### Participant information

Relationship with pregnant woman: \_\_\_\_\_

Age (years): \_\_\_\_\_

Marital status (Single, married/cohabitating, divorced, widowed): \_\_\_\_\_

Occupation (write in): \_\_\_\_\_

### Information on pregnant women

N° of women's interview: \_\_\_\_\_

Woman's date of most recent birth: \_\_\_\_\_

## Part 1. Values and needs surrounding the childbirth period

*Note to interviewers: only ask questions 1-3 at Khon Kaen University Hospital or any hospital that allows companions.*

76. How did you feel about your overall experience of your (wife/partner/daughter/sister...) giving birth?

- a. How would you describe your experience? Why?

77. Satisfaction

- a. How satisfied are you with the type of care your (wife/partner/daughter/sister...) received by your (wife/partner/daughter/sister...) during labour and childbirth?
- b. Can you give me an example of something you are very satisfied with?
- c. Can you give me an example of something you are NOT satisfied with?

78. How well do you feel that your (wife/partner/daughter/sister...) healthcare provider respected your opinions about care during labour and childbirth?

- a. Can you give me an example of a time when your (wife/partner/daughter/sister...) healthcare provider respected your opinions about care during labour and childbirth?
- b. Can you give me an example of a time when your (wife/partner/daughter/sister...) healthcare provider did NOT respect your opinions about your care during labour and childbirth?
  - i. Probe: Or, an example of a time during labour and childbirth when someone else was making decision without talking with you or your (wife/partner/daughter/sister...)?

79. Place of birth

- a. Was she planning that she would give birth in this facility? Why or why not?
- b. How was the decision made about where she gave birth?
  - i. Who was involved in the decision-making?

80. Thinking back to your wife/partner/sister birth, what are some of the things you value most? Why?

- a. Probe: to keep her healthy?
- b. Probe: to keep the baby healthy?
- c. Probe: for yourself personally?

## Part 2. Decision-making processes regarding mode of childbirth

81. Could you tell me about the different ways that women can give birth?

- a. Probe: How did you learn about these options?

82. What about for your (wife/partner/daughter/sister...) most recent birth – how did she give birth? For example, caesarean or vaginal birth?

- a. Is this the way that you preferred your (wife/partner/daughter/sister...) would give birth? Why or why not?
- b. Probe: How did you decide that you preferred her to give birth in this way?
  - i. Probe: Did your (wife/partner/daughter/sister...) influence your opinion? How?
  - ii. Probe: Did your family influence your opinion? How?
  - iii. Probe: Did your friends influence your opinion? How?



- 1  
2  
3 iv. Probe: Did your (wife/partner/daughter/sister...) doctor or midwife influence  
4 your opinion? How?  
5 v. Probe: Did the media influence your opinion? How?  
6  
7  
8 c. Did you discuss your opinion with your (wife/partner/daughter/sister...) doctor or  
9 midwife? If so, what was the discussion like?  
10  
11 83. Who decided about how she would give birth?  
12 a. Probe: who was involved in the decision-making?  
13 b. Probe: Did you influence this decision? How?  
14 c. Probe: Did your family or her family influence this decision? How?  
15 d. Probe: Did your friends or her friends influence this decision? How?  
16 e. Probe: Did the doctor or midwife influence this decision? How?  
17 f. Probe: Did the media influence this decision? How?  
18  
19  
20 84. How did you learn about vaginal birth and caesarean section?  
21  
22 85. Did you feel like you had enough information to understand the options that your  
23 (wife/partner/daughter/sister) had for how to give birth? Why or why not?  
24  
25 86. Did you feel like you had sufficient time to talk to your (wife/partner/daughter/sister...)  
26 doctor or midwife about any concerns that you had about your  
27 (wife/partner/daughter/sister...) labour and childbirth? Why or why not?  
28 a. Can you give me an example of a time when you felt that you were able to discuss  
29 your questions or concerns with your (wife/partner/daughter/sister...) doctor or  
30 midwife?  
31 b. Can you give me an example of a time when you felt that you were NOT able to  
32 discuss your questions or concerns with your (wife/partner/daughter/sister...)  
33 doctor or midwife?  
34  
35  
36 87. Pregnancy and childbirth are exciting times but can also be scary. Is there anything that you  
37 were afraid of or nervous about the childbirth?  
38  
39  
40 88. *A decision-analysis tool could help to educate women about their options for mode of birth*  
41 *and how to discuss their preferences with a doctor. Interviewer: show the woman the*  
42 *Vietnam decision analysis tool.*  
43 a. Would this type of tool be helpful to you? Why or why not?  
44 b. What type of information would you like to have included?  
45 c. This type of decision tool can be paper based like this example, or could be an  
46 application for a phone. Which of these options do you prefer and why?  
47  
48

### Part 3. Labour companionship

- 49  
50 89. Were you at the hospital with your (wife/partner/daughter/sister...) when she gave birth?  
51 Why or why not?  
52  
53 90. If you have gone to the hospital when your (wife/partner/ daughter/sister...) gave birth,  
54 what did you need in order to have a positive experience?  
55  
56 91. What type of support do you think your (wife/partner/ daughter/sister...) needed during  
57 labour and childbirth?  
58 a. Do you think she will received this type of support? Why or why not?  
59  
60

1  
2  
3  
4  
5  
6 Interviewer read: A labour companion is a person of the woman's choice, who can help to provide  
7 emotional support to the woman during labour and childbirth. Typically, this person would be with  
8 the woman continuously throughout labour and childbirth. This person may be the woman's  
9 husband/partner, her mother, or a friend.

10 92. Have you ever heard of someone providing this type of support?

11  
12  
13 93. What do you think of this type of support?

14  
15 94. Do you know if labour companionship was allowed in the hospital your (wife/partner/  
16 daughter/sister...) gave birth in?

- 17 a. *If labour companionship was not allowed:* What do you think are the reasons for not  
18 allowing a labour companion?  
19 b. Had your (wife/partner/sister...) be allowed a labour companion if she had  
20 requested it? Why or why not?  
21

22  
23 95. Have you ever provided this type of support before?

- 24 a. *If yes:* Could you tell me more about this?  
25

26 96. Do you think your (wife/partner/ daughter/sister...) would have wanted to have a labour  
27 companion for her birth? Why or why not?

28  
29 97. If your (wife/partner/ daughter/sister...) were to have a labour companion with her, who do  
30 you think she would prefer this person to be? Why?

31  
32 98. If your (wife/partner/ daughter/sister...) were to have a labour companion with her, what do  
33 you think she would expect from this person?

34  
35 99. Would you be interested in being a labour companion to your (wife/partner/  
36 daughter/sister...)? Why or why not?

37  
38 100. What would you need in order to be a good labor companion?

- 39 a. What do you need from the woman?  
40 b. What do you need from the nurses and doctors?  
41 c. What do you need from the hospital?  
42

43  
44 101. What type of information or education do you think a labour companion would need  
45 to be able to support her?

- 46 a. When do you think a woman should start talking to a potential labour companion  
47 about their role during labour and childbirth? (probe: at what month during the  
48 pregnancy?)  
49

50  
51 102. In your opinion, what changes do you think the hospital could make in order to  
52 make it more comfortable for women to have a labour companion?

53  
54  
55  
56 Thank you so much for your time. Is there anything else that you would like to share with me today  
57 about anything we talked about?  
58  
59  
60

## In-depth interview: providers

**Step 1:** Introduce yourself to the participant. Describe the purpose of the interview and how information will be used. Obtain oral/written consent.

**Step 2:** Complete sociodemographic information about the participant.

**Step 3:** Conduct the interview. Please remember to audio record the interview.

Interview place: \_\_\_\_\_

Interview date: \_\_\_\_\_

Start time: \_\_\_\_\_

End time: \_\_\_\_\_

Interviewer name: \_\_\_\_\_

Interview identification: \_\_\_\_\_

Participant information

Name of health facility currently employed at (write in): \_\_\_\_\_

Cadre and position (write in): \_\_\_\_\_

Number of years working at current health facility: \_\_\_\_\_

Number of years as a (doctor/midwife/nurse) in total: \_\_\_\_\_

Age (years): \_\_\_\_\_

Marital status (Single, married/cohabitating, divorced, widowed): \_\_\_\_\_

## Decision-making processes regarding mode of childbirth

1. Could you describe what you think quality care provided during childbirth is?
  - a. Could you give me an example of a situation when this kind of care was provided by you?
    - i. Why do you think you were able to provide quality care in this situation?
    - ii. How did your colleagues support you to provide quality care?
  - b. Could you give me an example of a situation when this kind of care was NOT provided by you or by a coworker?
    - i. Why do you think you weren't able to provide quality care in this situation?
    - ii. Did you feel like your colleagues supported you in this situation? Why or why not?
2. In your health facility, how are decisions made about whether a woman will give birth vaginally or by caesarean section?
  - i. Who is involved in making the decision, and what roles do they play?
  - ii. In your health facility, what are some of the clinical indications for caesarean section?
  - iii. Other than clinical indications for caesarean section, what factors might influence if a woman has a caesarean section?
3. Is assisted vaginal delivery (e.g. by vacuum or forceps) used in your facility?
  - i. Probe: why or why not?
  - ii. Probe: were you trained on how to provide assisted vaginal delivery? Please explain.
4. In your facility, do you think that women prefer to give birth by caesarean section or vaginally? Please explain.
5. In your health facility, how do you manage women who request to have an elective caesarean section?
  - i. Why do you think women may request to have a caesarean section without a medical indication (e.g. elective caesarean)?
  - ii. Who do you think influences women's decisions to have a caesarean section without a medical indication (e.g. elective caesarean)?
6. As a clinician, do you prefer for women to give birth vaginally or by caesarean section? Why?
  - i. What are some of the benefits/challenges of caesarean section/vaginal birth?
  - ii. Which do you think is safer: vaginal birth or caesarean section? Why?
7. In your opinion, are high rates of caesarean section a problem in your health facility? Why or why not?
  - i. *Probe if yes:*
    - i. Why do you think there are high rates of caesarean section in your facility?
    - ii. Do you think that the caesarean section rate in your facility can be reduced? Why or why not?
    - iii. Do you think that the caesarean section rate in your facility should be reduced? Why or why not?
    - iv. What are the barriers to reducing high rates of caesarean section in your facility?

- 1  
2  
3 v. What could be done to reduce high rates of caesarean section in your  
4 facility?  
5  
6 ii. *Probe if no:*  
7 i. Do you think that the caesarean section rate in your facility could be  
8 reduced? Why or why not?  
9 ii. Do you think that the caesarean section rate in your facility should be  
10 reduced? Why or why not?  
11 iii. What are the barriers to reducing high rates of caesarean section in your  
12 facility?  
13  
14 8. From your perspective, is a caesarean section more or less work for a healthcare provider,  
15 compared to a vaginal birth? Please explain.  
16  
17 9. In your opinion, do you think it is financially more profitable for providers or health facilities  
18 to conduct a caesarean section, compared to a vaginal birth?  
19 a. *Probe:* Why or why not?  
20  
21  
22

### Prenatal education and decision-analysis tool

23  
24 *Interviewer: The next section of this interview is about the type of health education about mode of*  
25 *birth that you think women would like to receive during antenatal care. I would like to ask you some*  
26 *questions about what you think about different topics of health education to be discussed during*  
27 *antenatal care.*  
28

- 29 10. In your opinion, do you think that women have sufficient knowledge about their options and  
30 the risks and benefits for different mode of birth? Why or why not?  
31  
32 11. In your practice, how do pregnant women they access information about their options for  
33 mode of birth?  
34 a. What do you think about these information resources?  
35  
36 12. What type of information do you think that women need to inform their preferences and  
37 decisions about their mode of birth?  
38 a. *Probe:* Risks of different methods, benefits of different methods, personal  
39 preferences  
40  
41 13. Do you think that groups of women may have different needs for information about mode of  
42 birth?  
43 a. *Probe if yes:* what groups of women do you think may need different information?  
44 b. *Probe if yes:* What type of information do you think that these women might need?  
45  
46 14. During antenatal care, do you (or providers conducting antenatal care in your facility) discuss  
47 with women whether they have a preference for vaginal birth or caesarean section?  
48 a. *IF YES, probe:* What do you discuss with the women?  
49 b. *IF NO, probe:* Do you think that discussing their preferences for vaginal birth or  
50 caesarean section could be helpful? Why or why not?  
51  
52 15. What information do you think could be included in prenatal education about vaginal birth  
53 and caesarean section?  
54  
55 16. At what point during a woman's pregnancy do you think they should receive this information  
56 about mode of birth? Why?  
57  
58  
59  
60

1  
2  
3 17. How often do you think women should receive this information about vaginal birth and  
4 caesarean section?

5 a. *Probe:* Once? More than once?

6  
7  
8 18. How would do you think women should receive this information?

9 a. *Probe:* Should she receive this information verbally, from her healthcare provider?  
10 Why or why not?

11 b. *Probe:* Should she receive this information in a pamphlet or brochure? Why or why  
12 not?

13 c. *Probe:* Should she receive this information using a computer or a mobile phone  
14 application? Why or why not?  
15

16  
17 *(Interviewer: use the Vietnam decision-analysis tool as an example)*

18 *The next section of this interview is about using decision-tools (such as a computer, tablet or a smart*  
19 *phone) to help pregnant women with previous caesarean sections to understand their choices about*  
20 *mode of birth. By this, we mean whether the woman will have planned vaginal birth, trial of labour,*  
21 *or a caesarean section. These decision-tools would provide them with information about potential*  
22 *benefits and harms of the different options. They would be in addition to any regular counselling or*  
23 *discussions with healthcare providers. I would like to ask you some questions about what you think*  
24 *about these decision-tools.*

25  
26 19. *A decision-tool could provide descriptions of the health outcomes associated with planned*  
27 *vaginal birth, planned caesarean section, and emergency caesarean section. They can also*  
28 *ask questions about a woman's values and preferences for possible outcomes. Once this*  
29 *information is provided, the decision-tool can produce a recommended "preferred option",*  
30 *based on a woman's preferences. The woman could then bring this to her healthcare*  
31 *provider to discuss in more detail. What do you think about this type of decision-tool?*

32 Does this description of a decision-tool sound like something that might be useful to you? Why  
33 or why not?

34 a. What do you think are some of the benefits of using a decision-tool to help decide  
35 about how a woman will give birth?

36 i. *Probe:* to you as a provider?

37 ii. *Probe:* to the woman

38  
39 b. What do you think are some of the challenges of using a decision-tool to help decide  
40 about how a woman will give birth?

41 iii. *Probe:* to you as a provider?

42 iv. *Probe:* to the woman

43 c. At what point during a woman's pregnancy would it be most helpful for her to have  
44 access to this type of decision-tool? Why?

45 d. How might you use the results of the decision tool, or the woman's "preferred  
46 option", to discuss her options for mode of birth?

47 e. Do you think that you would recommend that women use this type of decision-tool?  
48 Why or why not?  
49

50  
51 20. These types of decision-tools can come in different formats. For example, on paper, a  
52 computer, a tablet, or a smart phone application. What format do you think would be most  
53 helpful? Why?  
54

## 55 56 Audit and feedback

57  
58 *Note to interviewer: use graphic of audit and feedback/Robson classification to explain to providers*  
59 *who don't understand. Consider using an example of maternal morbidity and mortality conference as*  
60 *example of audit and feedback.*

1  
2  
3 Interviewer: The next part of the study is about **using audit and feedback as a tool for quality**  
4 **improvement**. The purpose of audit and feedback is to encourage individuals and teams to follow  
5 professional standards or targets and to monitor changes and outcomes when these are used. During  
6 an audit and feedback process, an individual's or department's professional practice and/or  
7 performance is measured and compared to targets or professional standards. The results of this  
8 comparison are fed back to the individual by either a colleague, supervisor or third party, in the form  
9 of verbal or written communication. I would like to ask you some questions about what you think  
10 about audit and feedback.  
11

- 12 21. Could you tell me about a time where you have been involved in an audit and feedback  
13 project?  
14 a. *If they have been involved in an audit and feedback project:*  
15 i. What did you find helpful about the audit and feedback process?  
16 ii. What did you find challenging about the audit and feedback process?  
17 iii. What were the main things you learned from the audit and feedback  
18 process?  
19 iv. Overall, what was your opinion regarding the audit and feedback process?  
20  
21  
22 22. What areas of health do you think would be most interesting and relevant for audit and  
23 feedback? For example, this might include reasons for caesarean section, severe morbidity.  
24 Why are these interesting?  
25

26 *Audit and feedback to improve obstetric care may include activities like critical case incident*  
27 *reviews, indications for caesarean section, time from decision to operation for caesarean section,*  
28 *decision-making processes for caesarean section, and appropriate management of*  
29 *complications. This may be done by reviewing individual patient records, labour and delivery*  
30 *logs, and observations of clinical practice.*  
31

- 32 23. How would you feel about the idea of a regular audit and feedback process in your health  
33 facility to address rising caesarean section rates?  
34  
35  
36 24. What might be some of the benefits of audit and feedback may be related to caesarean  
37 section?  
38  
39 25. What might be some of the challenges of audit and feedback may be related to caesarean  
40 section?  
41  
42 26. Do you think starting an audit and feedback process may change people's behaviour in your  
43 department? Why or why not?  
44  
45  
46 27. Do you think starting an audit and feedback process may change health outcomes? Why or  
47 why not?  
48  
49 28. What could be done in your health facility to ensure that audit and feedback is conducted in  
50 a supportive way that emphasises learning rather than punishing providers for certain  
51 behaviours?  
52  
53  
54 29. How can audit and feedback be presented to you to ensure that any information gathered is  
55 "actionable" so that an individual can work to improve their practice?  
56  
57  
58 30. What type of person would be the most appropriate person to:  
59 a. Review medical records?  
60 b. Analyse the data and prepare a summary report?

- 1  
2  
3 c. To present or discuss the report with you?  
4 d. Probe: Would you prefer that this person were a colleague, supervisor, or someone  
5 external? Why?  
6  
7

8 31. Approximately how often do you think that audit and feedback processes should occur in  
9 your health facility? Please explain.  
10

11 *(Interviewer: do not ask these questions to antenatal nurses)*

12 *Interviewer: The next part of the study is about the **audit and feedback tools for classifying***  
13 ***caesarean sections**. These tools may be useful for healthcare providers and administrators to*  
14 *monitor which women are receiving caesarean sections, and also to help to compare caesarean*  
15 *section rates over time or across different health facilities and countries. This may help to design and*  
16 *implement interventions to make sure that an optimal caesarean section rate can occur in a specific*  
17 *health facility. I would like to ask you some questions about what you think of such audit and*  
18 *feedback tools. In order to understand drivers of rising Caesarean section rates, we need to have*  
19 *tools to monitor and compare caesarean section rates in a setting over time. One way to do this is*  
20 *the Robson classification system, which prospectively classifies women admitted for childbirth into*  
21 *one of ten groups.*  
22

- 23  
24 32. Have you heard of the Robson classification system before?  
25 a. *If yes:* Can you tell me what you know about the Robson classification system?  
26 b. *If no,* Do you know of any other classification systems to classify women giving birth?  
27  
28 33. Conducting audit and feedback for caesarean section requires reviewing patient medical  
29 records and/or facility logs. Could you tell me about how records are prepared and kept in  
30 your health facility?  
31 a. What is your perception regarding the completeness of labour and delivery records  
32 in your health facility?  
33 1. Probe: Do you think that labour and delivery records are complete and  
34 accurate for all or most women in your health facility? Why or why not?  
35 b. Probe: Who is responsible for recording in the medical records?  
36 c. Probe: In addition to the individual patient's record, how else is data collected and  
37 recorded on the labour and delivery ward?  
38 b. Probe: is there a facility-level logbook? If so, who is responsible for this? What type  
39 of data is recorded?  
40  
41  
42

43 In-service training and implementation of clinical practice guidelines

44 34. How well do you feel your training prepared you for your current position? Please explain.  
45  
46  
47  
48  
49  
50  
51  
52  
53  
54  
55  
56  
57  
58  
59  
60



1  
2  
3 *Interviewer: The next part of the study is about continuous training and implementation of clinical*  
4 *practice guidelines. This refers to the processes by which guideline recommendations are used to help*  
5 *healthcare providers make informed decisions about how and when to provide care in order to*  
6 *achieve the best health outcomes. I would like to ask you some questions about what you think about*  
7 *guideline implementation.*  
8

9 35. Are you aware of any clinical practice guidelines (algorithms/flowcharts/clinical protocols)  
10 related to obstetrics?

11 a. If yes, which clinical practice guidelines are you familiar with?

- 12 i. In your opinion, how valuable are the obstetrics clinical practice guidelines  
13 to your practice?  
14 ii. In your opinion, how accessible are these clinical practice guidelines to  
15 healthcare providers?  
16 iii. *Probe:* what could be done to improve the accessibility of clinical practice  
17 guidelines to other healthcare providers?  
18 iv. Could you describe the process of how obstetrics clinical practice guidelines  
19 are prioritised in your health facility?  
20 v. How are the clinical practice guidelines communicated to other healthcare  
21 providers in your facility?  
22 vi. How do you use clinical practice guidelines in your practice?

23 b. *If no, probe:*

- 24 i. How do healthcare providers in your facility make decisions about how to  
25 manage patients?  
26 ii. In your health facility, are clinical practice guidelines currently used in  
27 obstetrics?  
28 iii. In your opinion, what could be done to improve the accessibility of clinical  
29 practice guidelines to other healthcare providers?  
30

31  
32  
33 36. Imagine that your health facility will start a process of updating and implementing obstetrics  
34 clinical practice guidelines (algorithms/flowcharts/clinical protocols). Who would need to  
35 support this initiative in order for it to be successful?

36 a. *Probe:* Why would this person/these people need to support the initiative?

37  
38 b. *Probe:* How would this person/these people best support the initiative?

39  
40 c. What type of training would be helpful to ensure that all staff understand the clinical  
41 practice guidelines?

- 42 i. What type of topics would you like to have covered during the training?  
43 1. Would you be interested to learn about how clinical practice  
44 guidelines were developed? Why or why not?  
45 2. Would you be interested to learn about the evidence behind the  
46 recommendations in clinical practice guidelines, such as the  
47 systematic reviews or clinical trials?  
48 ii. How long should the training last for?  
49 iii. How often should the training be repeated?  
50 iv. Where should the training be held (e.g. within the facility, outside the  
51 facility)?

52  
53 d. What resources would be needed in order to successful implement obstetrics clinical  
54 protocols?  
55

- 1  
2  
3  
4  
5  
6  
7  
8  
9  
10  
11  
12  
13  
14  
15  
16  
17  
18  
19  
20  
21  
22  
23  
24  
25  
26  
27  
28  
29  
30  
31  
32  
33  
34  
35  
36  
37  
38  
39  
40  
41  
42  
43  
44  
45  
46  
47  
48  
49  
50  
51  
52  
53  
54  
55  
56  
57  
58  
59  
60
- e. In your opinion, what are some barriers to successful implementation of obstetrics clinical practice guidelines?
  - f. In your opinion, what are some facilitators to successful implementation of obstetrics clinical practice guidelines?
  - g. *Usually when clinical practice guidelines are implemented in health facilities, there are activities to evaluate if the guidelines are being implemented correctly and consistently.* What type of evaluation activities would be helpful to assess if obstetrics clinical practice guidelines were being implemented correctly and consistently?
    - i. What format would be appropriate to feedback the evaluations to healthcare providers?
    - ii. If meetings were held to feedback on the progress of obstetric clinical practice guidelines implementation, what would you like to hear discussed?
      - 1. Who would attend these meetings and why?
      - 2. How often would these meetings be held?
37. In your opinion, how important is providing pain relief for women during labour (vaginal birth only)? Why?
- a. In your facility, what pain relief options are there for women during labour (vaginal birth only)? Probe: pharmacological and non-pharmacological methods
  - b. In your opinion, how important is it for women to walk around during labour (vaginal birth only)? Why?
  - c. In your opinion, how important is it for women to be able to sit upright during labour (vaginal birth only)? Why?

### Opinion leader education

*Interviewer: The next part of the study is about using opinion leaders in a specific health facility to act as champions for change. Opinion leaders are influential individuals who are nominated by their peers to change the culture and norms of healthcare provider peer groups. For example, these individuals may be responsible for adapting clinical guidelines to a specific health facility context, and identifying measures to ensure quality improvement. I would like to ask you some questions about what you think about the use of opinion leaders in your health facility.*

- 38. What do you think are the characteristics of a good opinion leader?
- 39. What do you think about the idea of using opinion leaders to adapt clinical guidelines to your health facility?
- 40. What type of healthcare provider would be most appropriate to act as an opinion leader for caesarean section? (probe: nurse/midwife/doctor, what level of training)
- 41. How do you think an opinion leader would be received by other healthcare providers in your health facility?

- 1  
2  
3  
4  
5  
6  
7  
8  
9  
10  
11
42. What challenges do you think an opinion leader would face if they tried to adapt and implement clinical guidelines in your health facility?
43. What type of *training* would an opinion leader need to succeed?
44. What resources would an opinion leader need to succeed?

### Organization and relationships in the facility

- 12  
13  
14  
15  
16  
17  
18  
19  
20  
21  
22  
23  
24  
25  
26  
27  
28  
29  
30  
31  
32  
33  
34  
35  
36  
37  
38  
39  
40  
41  
42  
43  
44  
45  
46  
47  
48  
49  
50  
51  
52  
53  
54  
55  
56  
57  
58  
59  
60
45. Could you please describe for me what the relationship that you have with your peers is like?
- Could you tell me about a time when your peers supported you?
  - Could you tell me about a time when your peers did not support you?
  - If you are struggling to meet the demands of your work, can you look to your peers for help? How so?
  - In your opinion, are men and women treated equally in your work place? Why or why not?
46. In your opinion, how well do doctors and midwives work together in general?
- How well do you think doctors and midwives communicate?
  - What are some of the challenges in having midwives and doctors work together?
  - Can you tell me about a time when midwives and doctors did NOT work together?
    - Why do you think this happened?
  - Can you tell me about a time when midwives and doctors worked very well together?
    - Why do you think this happened?
47. Overall, how supportive do you feel that your work environment is? Please explain.
48. How do you feel about the current environment around malpractice lawsuits and legal liability for doctors?
- Do you feel that the health system or your health facility would support you in a legal case?
  - How do you think that the legal environment may influence your own, or your colleagues', medical practice?
49. Do you feel afraid of malpractice lawsuits in your current work? Please explain.
50. What strategies do you employ to minimise the risk of a malpractice lawsuit?
- Do you think these strategies are reasonable?

## Labour companionship

*Interviewer: The next part of the study is about the type of support that women could receive during childbirth in a health facility. In some settings, a "labour companion" can provide this type of support. A labour companion is a person of the woman's choice, for example her husband, her sister, her mother, her friend, or a doula, who stays with the woman throughout the duration of labour and childbirth. I would like to ask you some questions about what you think about support from a companion during childbirth.*

51. What type of support do you think women need during labour and childbirth?
  - a. Do you think that women in your hospital receive this kind of support you have described? Why or why not?
  
52. What do you know about labour companionship?
  - a. What are the benefits of labour companionship?
    - i. *Probe:* What are benefits for the woman?
    - ii. *Probe:* What are benefits for the providers?
    - iii. *Probe:* What are benefits for the companion?
  - b. Are there any harms of labour companionship?
    - i. *Probe:* What are harms for the woman?
    - ii. *Probe:* What are harms for the providers?
    - iii. *Probe:* What are harms for the companion?
  
53. Do you have any previous experience with working in a hospital that offered labour support?
  - i. If yes, what was this experience like for you as a provider?
  
54. Do you know if labour companionship is allowed in this hospital?
  - a. *If labour companionship is not allowed:* What do you think are the reasons for not allowing a labour companion in this hospital?
  
55. How could labour companionship be implemented in your hospital or other hospitals like this?
  - a. What would be the main challenges to implementing labour companionship?
  - b. Who do you think women would prefer as a labour companion? Why?
  - c. As a provider, what are your expectations from a woman's labour companion?
  - d. When would a labour companion be able to be with the woman in the hospital?
  - e. What would the role of the labour companion be?
    - i. How could the labour companion's roles be communicated to them?
  - f. At what point during the care process should women and providers start talking about labour companionship and the role of the companion?
  - g. What type of information or education do you think a labour companion would need to be able to support you?
  - h. How could we ensure that the companion is a person of the woman's choice, and not someone selected for her by someone else?
  - i. What changes do you think the hospital could make to make it more comfortable for women to have a labour companion?
  - j. If labour companionship is to be implemented in this hospital, what would ensure successful implementation?
    - a. What could be done to ensure that labour companionship was sustainable in the long-term?

## Appendix 2. Readiness assessment

|    |                  |  |
|----|------------------|--|
| 1. | Name of hospital |  |
| 2. | Hospital code    |  |

*This activity is part of the readiness assessment, to explore factors to be assessed, considered and integrated into implementation plans. There are five components of this readiness assessment:*

1. *Inventory of physical space and readiness;*
2. *Health workforce and model of care;*
3. *Protocols and guidelines for managing clinical care during labour and childbirth;*
4. *Continuous education and quality improvement*
5. *Assessment of data availability and access for audit and feedback; and*
6. *Understanding of labour companionship in practice.*

*For each of the study health facilities, please have a member of the research team visit to conduct an observation of the labour ward and medical records. It may be most appropriate for this person to have some clinical knowledge. We expect that this activity will take approximately four to six hours to complete (depending on how busy the facility is). Prior to conducting the readiness assessment, please ensure that all members of the maternity care unit at each health facility are briefed on the purpose of the activity, what the readiness assessment will entail, and how they may be of assistance. This will help to ensure that the readiness assessment (and other research activities) will be welcomed by the unit.*

### *Initial inventory*

|    |                                                                                                                           |  |
|----|---------------------------------------------------------------------------------------------------------------------------|--|
| 3. | # of Deliveries (1 October 2019 – 31 January 2020)                                                                        |  |
| 4. | No of delivery handled exclusively by a certain obstetrician (private)                                                    |  |
| 5. | Women not handled exclusively by a certain obstetrician (non-private)                                                     |  |
| 6. | No. of Caesarean section (1 October 2019 – 31 January 2020)                                                               |  |
| 7. | Elective (pre-labour c-section)<br><i>Note: if this information is not readily available, then please ignore for now.</i> |  |
| 8. | Emergency (intrapartum c-section)                                                                                         |  |
| 9. | No. of vaginal instrumental delivery (1 October 2019 – 31 January 2020)                                                   |  |

**Part 1. Inventory of physical space and resources**

*Please observe the physical space of the labour, delivery and postnatal wards. If these are in separate areas (e.g.: women in latent labour in a labour ward, women in active labour in a separate room/delivery ward, separate postnatal ward), please assess both areas according to all points below. Please provide a narrative description of the wards, as well as a visual depiction.*

Description of the physical space

**Please detail:**

|                                                                                   |  |
|-----------------------------------------------------------------------------------|--|
| # of beds in labour /admission room (1 <sup>st</sup> stage of labour room):       |  |
| # of beds in labour / childbirth room (2 <sup>nd</sup> stage of labour room):     |  |
| # Ultrasound machine in the labour room (indicate number working)                 |  |
| # Electronic fetal heart rate monitor (CTG) (indicate number of devices working ) |  |

Description of any curtains, dividers or other means of protecting a woman’s privacy

Description of the potential for crowding. For example, how many beds are present? Are they currently or usually full? What happens if there is overcrowding?

1  
2  
3 Description of the visiting hours and allowable visitors (check if visually displayed and ask an administrator)  
4 (please take a photo if there is a sign)  
5

6  
7  
8  
9  
10  
11  
12  
13  
14

15 Description of the accessibility to toilets or washrooms

16  
17  
18  
19  
20  
21  
22  
23  
24  
25

26 Description of overnight accommodation for family members/friends of women (check if visually displayed and  
27 ask an administrator)  
28

29  
30  
31  
32  
33  
34  
35  
36

37 Description of the **operating theatres** (how is access to the theatre, is there one theatre reserved for  
38 obstetrics, is the theatre on the same floor? How are handwashing facilities)  
39

40  
41  
42  
43  
44  
45  
46  
47

48  
49 Please detail how many theatres are exclusively to perform a CS (#)

50  
51  
52  
53  
54  
55  
56  
57  
58  
59  
60

1  
2  
3  
4  
5  
6  
7  
8  
9  
10  
11  
12  
13  
14  
15  
16  
17  
18  
19  
20  
21  
22  
23  
24  
25  
26  
27  
28  
29  
30  
31  
32  
33  
34  
35  
36  
37  
38  
39  
40  
41  
42  
43  
44  
45  
46

Please sketch the physical space

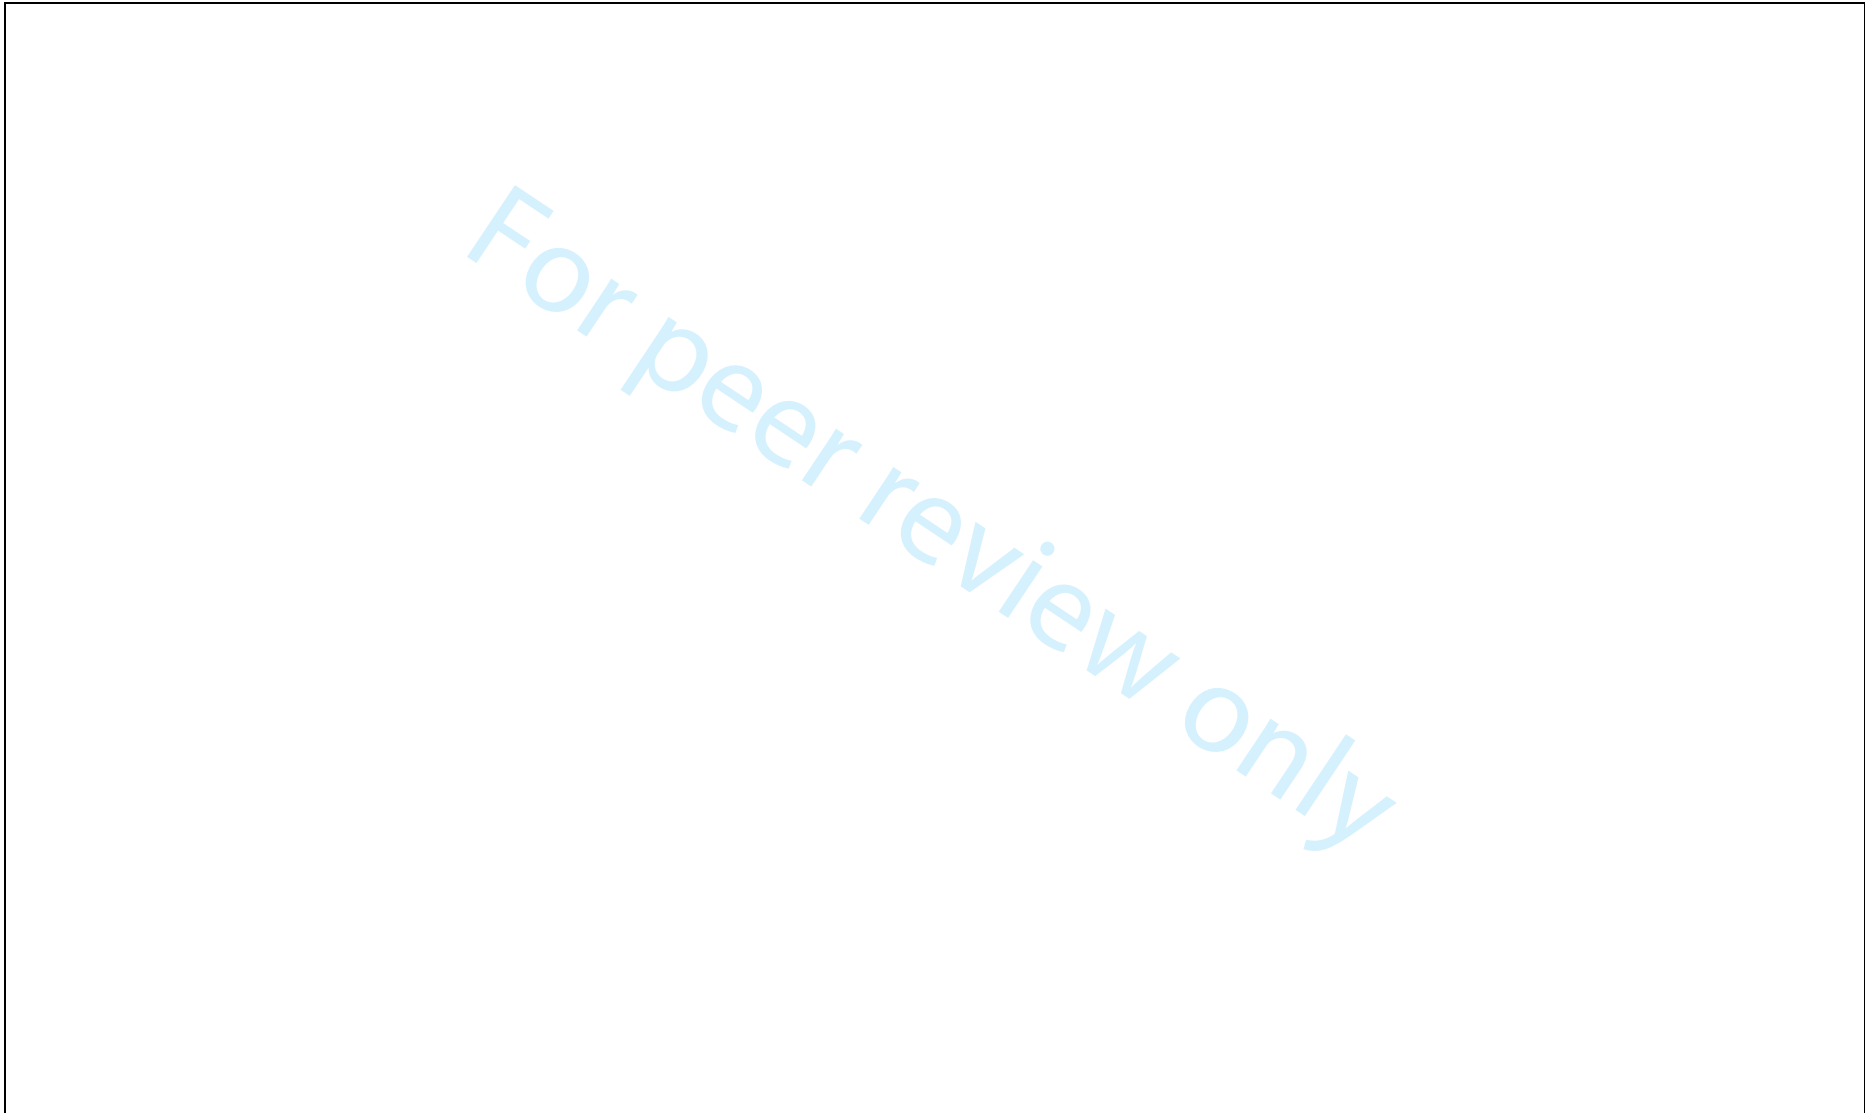



**Part 2.** Health workforce and model of care.

Completing this section may require both observation of the labour ward and a discussion with staff, e.g.: a matron-in-charge or head of obstetrics.

Please indicate below the **staffing available for the delivery ward alone**. Please include all staff on the payroll. Please do not count the staff only working on ANC or PNC. If staff works part-time in the maternity, try to summarise to have full-time-equivalents.

| STAFFING – LABOUR AND DELIVERY WARD ONLY |                                                      |                                        |
|------------------------------------------|------------------------------------------------------|----------------------------------------|
|                                          | Staff category                                       | Number employed (Full-time equivalent) |
| 1.                                       | Obstetrician                                         |                                        |
| 2.                                       | Anaesthesiologists                                   |                                        |
| 3.                                       | Paediatrician                                        |                                        |
| 4.                                       | Medical doctors (graduated, no specialization)       |                                        |
| 5.                                       | Residents (medics in training)                       |                                        |
| 6.                                       | Nurses / nurse-midwives                              |                                        |
| 7.                                       | Distinct midwives (exclusively trained on midwifery) |                                        |
| 8.                                       | Delivery assistants / auxiliary nursing staff        |                                        |
| 9.                                       | Cleaners / other auxiliary non-nursing staff         |                                        |

| STAFFING ON SHIFTS IN LABOUR AND DELIVERY |                                                      |                                                     |                                                       |
|-------------------------------------------|------------------------------------------------------|-----------------------------------------------------|-------------------------------------------------------|
|                                           | Staff category                                       | DAY SHIFT<br>Number employed (Full-time equivalent) | NIGHT SHIFT<br>Number employed (Full-time equivalent) |
| 1.                                        | Obstetrician                                         |                                                     |                                                       |
| 2.                                        | Anesthesiologists                                    |                                                     |                                                       |
| 3.                                        | Pediatrician                                         |                                                     |                                                       |
| 4.                                        | Medical doctors (graduated, no specialization)       |                                                     |                                                       |
| 5.                                        | Residents (medics in training)                       |                                                     |                                                       |
| 6.                                        | Nurses / nurse-midwives                              |                                                     |                                                       |
| 7.                                        | Distinct midwives (exclusively trained in midwifery) |                                                     |                                                       |
| 8.                                        | Delivery assistants / auxiliary nursing staff        |                                                     |                                                       |
| 9.                                        | Cleaners / other auxiliary non-nursing staff         |                                                     |                                                       |

Please indicate below the **staffing available for the ANTENATAL CARE ward alone. Please include all staff on the payroll.** Please do not count the staff only working on ANC or PNC. If staff works part-time in the maternity, try to summarise to have Full-time-equivalents.

| STAFFING – ANTENATAL CARE WARD ONLY |                                                      |                                        |
|-------------------------------------|------------------------------------------------------|----------------------------------------|
|                                     | Staff category                                       | Number employed (Full-time equivalent) |
| 1.                                  | Obstetrician                                         |                                        |
| 2.                                  | Anesthesiologists                                    |                                        |
| 3.                                  | Pediatrician                                         |                                        |
| 4.                                  | Medical doctors (graduated, no specialization)       |                                        |
| 5.                                  | Residents (medics in training)                       |                                        |
| 6.                                  | Nurses / nurse-midwives                              |                                        |
| 7.                                  | Distinct midwives (exclusively trained on midwifery) |                                        |
| 8.                                  | Delivery assistants / auxiliary nursing staff        |                                        |
| 9.                                  | Cleaners / other auxiliary non-nursing staff         |                                        |

| STAFFING ON SHIFTS IN ANTENATAL CARE WARD |                                                      |                                                     |                                                       |
|-------------------------------------------|------------------------------------------------------|-----------------------------------------------------|-------------------------------------------------------|
|                                           | Staff category                                       | DAY SHIFT<br>Number employed (Full-time equivalent) | NIGHT SHIFT<br>Number employed (Full-time equivalent) |
| 1.                                        | Obstetrician                                         |                                                     |                                                       |
| 2.                                        | Anesthesiologists                                    |                                                     |                                                       |
| 3.                                        | Pediatrician                                         |                                                     |                                                       |
| 4.                                        | Medical doctors (graduated, no specialization)       |                                                     |                                                       |
| 5.                                        | Residents (medics in training)                       |                                                     |                                                       |
| 6.                                        | Nurses / nurse-midwives                              |                                                     |                                                       |
| 7.                                        | Distinct midwives (exclusively trained in midwifery) |                                                     |                                                       |
| 8.                                        | Delivery assistants / auxiliary nursing staff        |                                                     |                                                       |
| 9.                                        | Cleaners / other auxiliary non-nursing staff         |                                                     |                                                       |

Please explain the on-call system: Is the doctor to perform a CS in the hospital even at night, or is s/he on-call at home? Are there other resource-persons one can call in if needed?

**Part 3.** Protocols and guidelines for managing clinical care during labour and childbirth.

Please list the protocols available and in use in this hospital. Please indicate if the head of maternity indicates the presence. If so ask about the type of guidelines (national standard guidelines e.g by MoH or professional organisation) and if the guideline is physically available, e.g in a folder or displayed at the wall.

| S. No | List of Protocols                         | Present         | Type                                           | Displayed |
|-------|-------------------------------------------|-----------------|------------------------------------------------|-----------|
|       |                                           | 1. Yes<br>2. No | 1. National Standards<br>2. Hospital Specified | Yes<br>No |
| 1.    | Partograph use / fetal monitoring         |                 |                                                |           |
| 2.    | Active Management of Third Stage of labor |                 |                                                |           |
| 3.    | Postpartum haemorrhage management         |                 |                                                |           |
| 4.    | Blood transfusion                         |                 |                                                |           |
| 5.    | Pre-term labor                            |                 |                                                |           |
| 6.    | Induction / augmentation of labour        |                 |                                                |           |
| 7.    | Antenatal steroids                        |                 |                                                |           |
| 8.    | Obstructed labour                         |                 |                                                |           |
| 9.    | Previous CS (trial of labour)             |                 |                                                |           |

1  
2  
3 *Completing this section may require both observation of the labour ward (e.g.: posters or signs) and*  
4 *a discussion with staff, e.g.: a matron-in-charge or head of obstetrics. If possible, make a photo if*  
5 *there are guidelines on the wall.*  
6

7  
8 Could you describe how any clinical protocols or guidelines for managing *routine or complicated*  
9 *labour and childbirth* care were developed or adapted, and updated? Is there a team in the hospital  
10 taking care of this? Can you explain how are these clinical protocols/guidelines used?  
11

For peer review only

31 **Continuous education and quality improvement**

32 *Specify for trainings provided in the last 1 year*

| List of training provided                  | Type<br>1. National Standard training<br>2. Hospital Specified | Was the training provided to<br>1. All providers<br>2. Only doctors<br>3. Only nurse-midwives |
|--------------------------------------------|----------------------------------------------------------------|-----------------------------------------------------------------------------------------------|
| Partograph use / fetal monitoring          |                                                                |                                                                                               |
| Active Management of Third Stage of labour |                                                                |                                                                                               |
| Postpartum haemorrhage management          |                                                                |                                                                                               |
| Blood transfusion                          |                                                                |                                                                                               |
| Pre-term labor /                           |                                                                |                                                                                               |
| Introduction / augmentation of labour      |                                                                |                                                                                               |
| Antenatal steroids                         |                                                                |                                                                                               |
| Obstructed labour                          |                                                                |                                                                                               |
| Previous CS (trial of labour)              |                                                                |                                                                                               |

1  
2  
3 *Could you please describe other quality improvement activities ongoing in this facility. How are*  
4 *nurses and doctors informed about new knowledge and guidelines? Do you need to go regularly to*  
5 *refresh knowledge to workshops or trainings?*  
6  
7

8  
9  
10  
11  
12  
13  
14  
15  
16  
17

18  
19 *Do you do on-the-job training / mentoring of younger colleagues? Is there a system of supervision? Is*  
20 *there a system to discuss difficult cases, e.g. during a morning report? Do you do audits of cases?*  
21  
22

23  
24  
25  
26  
27  
28  
29  
30  
31  
32  
33  
34  
35  
36  
37  
38  
39

40  
41 **Please explain how informed consent is obtained for caesarean section** (oral, written, included in  
42 **medical record, etc).**  
43

44  
45  
46  
47  
48  
49  
50  
51  
52  
53  
54

1  
2  
3 **Part 4.** Assessment of facility medical records and data management systems  
4

5 *Please review individual medical records to assess the information currently collected related to key obstetric*  
6 *variables at an individual level. Please also review any facility-level register, log book or other records to assess*  
7 *information currently collected related to key obstetric variables at a facility level. It may be helpful to discuss*  
8 *the medical and facility records with the staff, e.g.: a matron-in-charge or head of obstetrics. Collecting this*  
9 *information will help to inform the implementation of the Robson classification system, e.g.: to identify what*  
10 *data is already routinely collected, and what data may need to be added to routine data collection.*  
11

12 Please explain which information is used. Description of other information routinely collected about  
13 caesarean section (e.g. provider, morbidity)  
14

15  
16  
17  
18  
19  
20  
21  
22



23  
24 There are typically two different places for documentation a) facility-level register, log book, or other  
25 records collating key obstetric variables and b) case notes/patient records. Now first we like to have  
26 information on the first type:  
27

28 Please describe the description of any facility-level register, log book, or other records collating key  
29 obstetric variables at the facility-level. Please include whether this register is paper-based or  
30 electronic, when it is updated, when and how information is summarised and how often it is  
31 reported. Please take a photo (covering patient names).  
32  
33

34  
35  
36  
37  
38  
39  
40  
41  
42



43  
44  
45 Who is responsible for completing the facility-level register?  
46

47  
48  
49  
50  
51  
52  
53



1  
2  
3 How often is the facility-level register updated and summaries are prepared?  
4  
5

6  
7  
8  
9  
10  
11  
12

13  
14 How is the information about facility-level key obstetric variables and outcomes currently integrated  
15 into audit and feedback?  
16

17  
18  
19  
20  
21  
22  
23  
24

25  
26 Description of the consistency of reporting for these indicators (e.g.: consistently reported across all  
27 records reviewed, some data missing – be specific).  
28

29  
30  
31  
32  
33  
34  
35  
36  
37

38  
39 Who is present during audit and feedback sessions, and who leads the sessions?  
40

41  
42  
43  
44  
45  
46  
47  
48  
49  
50

Description of the health facility’s “decision-to-incision” time to perform a caesarean section. If not available, please specify.

**Now concerning the second type of records:** case notes/medical records: Please describe the medical record structure (e.g. electronic or paper), and who keeps the records (e.g. woman or provider)? Is there a standard form? Is the WHO partograph used? Are the data used for audits and feedback?

Is there any regular feedback of these reports to the providers? If so, how often and in what format?

*Review of medical records to assess if key obstetric variables needed for Robson classification are correctly and consistently reported at an individual level. For each variable, please (1) ask the administrator how it is reported, and (2) observe a subset of records to assess how variable is actually reported (e.g. 5-10 medical records).*

| Parity                 |                        |
|------------------------|------------------------|
| Administrator response | Observation of records |
|                        |                        |



1  
2  
3  
4  
5  
6  
7  
8  
9

| <b>Previous caesarean section</b> |                               |
|-----------------------------------|-------------------------------|
| <b>Administrator response</b>     | <b>Observation of records</b> |
|                                   |                               |

10  
11  
12  
13  
14  
15  
16  
17  
18

| <b>Onset of labour (spontaneous, induced, no labour/pre-labour caesarean section)</b> |                               |
|---------------------------------------------------------------------------------------|-------------------------------|
| <b>Administrator response</b>                                                         | <b>Observation of records</b> |
|                                                                                       |                               |

19  
20  
21  
22  
23  
24  
25  
26  
27

| <b>Gestational age (preterm &lt;37 weeks, term ≥ 37 weeks)</b> |                               |
|----------------------------------------------------------------|-------------------------------|
| <b>Administrator response</b>                                  | <b>Observation of records</b> |
|                                                                |                               |

28  
29  
30  
31  
32  
33  
34  
35  
36

| <b>Fetal presentation or lie (cephalic, breech, transverse)</b> |                               |
|-----------------------------------------------------------------|-------------------------------|
| <b>Administrator response</b>                                   | <b>Observation of records</b> |
|                                                                 |                               |

37  
38  
39  
40  
41  
42  
43  
44  
45

| <b>Number of fetuses (singleton, multiple)</b> |                               |
|------------------------------------------------|-------------------------------|
| <b>Administrator response</b>                  | <b>Observation of records</b> |
|                                                |                               |

46  
47  
48  
49

Who is responsible for completing the individual-level medical records? Does anyone else check for consistent and correct reporting?

50  
51  
52  
53  
54  
55  
56  
57  
58  
59  
60

1  
2  
3 Based on the observations and record assessment, what would you consider to be the most  
4 appropriate method of implementation of the Robson classification system (manually, using a  
5 spreadsheet or automatic calculator, or via electronic records)? Please explain.  
6  
7

8  
9  
10  
11  
12  
13  
14  
15  
16

17  
18 [Ask the administrator] What type of person would be the most appropriate facility-level champion  
19 to implement the Robson classification system, and why? [e.g.: type of provider, what skills this  
20 person would have]  
21

22  
23  
24  
25  
26  
27  
28  
29  
30

31  
32 [Ask the administrator] Who is the best person to record data for Robson classification, and why?  
33

34  
35  
36  
37  
38  
39  
40  
41

42  
43 [Ask the administrator] Who is the best person to analyse data for Robson classification, and why?  
44

45  
46  
47  
48  
49  
50  
51  
52

1  
2  
3 [Ask the administrator] Who is the best person to report and present data for Robson classification,  
4 and why?  
5  
6

7  
8  
9  
10  
11  
12

13  
14 **Part 5. Understanding of labour companionship in practice**

15  
16 *Completing this section may require both observation of the labour ward and a discussion with staff,*  
17 *e.g.: a matron-in-charge or head of obstetrics. If companionship is not currently allowed at the*  
18 *facility, please specify below.*  
19

20 Description of who is currently allowed to act as a companion for the woman  
21

22  
23  
24  
25  
26  
27  
28  
29

30  
31 Description of for what periods of time companionship is offered (e.g.: from admission to discharge,  
32 during labour but not childbirth, only at childbirth)  
33  
34

35  
36  
37  
38  
39  
40  
41  
42  
43

44  
45 **Please detail at what stages / and time of the day companions are allowed:**

46  
47  
48  
49  
50  
51  
52  
53  
54  
55  
56  
57  
58  
59  
60

|                                                 |          |
|-------------------------------------------------|----------|
| Labour / first stage                            | Yes / no |
| Delivery / second stage                         | Yes / no |
| Immediate postpartum period (first hour or two) | Yes / no |
| Postnatal ward                                  | Yes / no |
| Day-time                                        | Yes / no |
| Night-time                                      | Yes / no |

1  
2  
3 Description of the roles that companions usually undertake (e.g.: emotional support, providing  
4 food/water/tea to the woman, supporting staff)  
5  
6

7  
8  
9  
10  
11  
12  
13  
14  
15

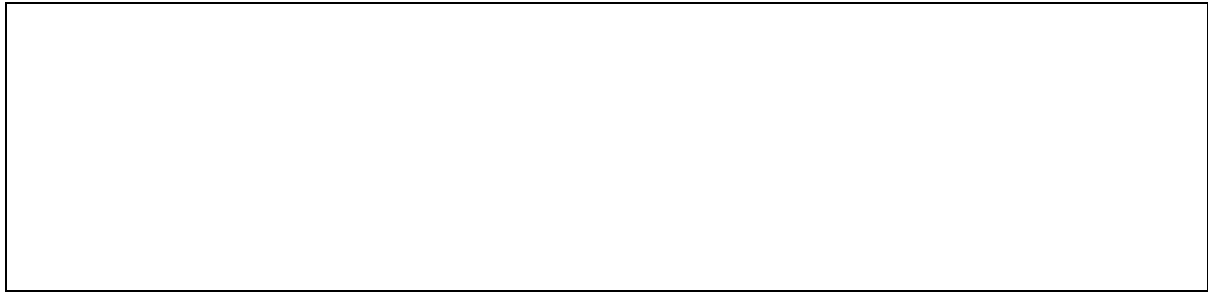

16  
17 Description of how staff currently interact with companions  
18

19  
20  
21  
22  
23  
24  
25  
26  
27  
28

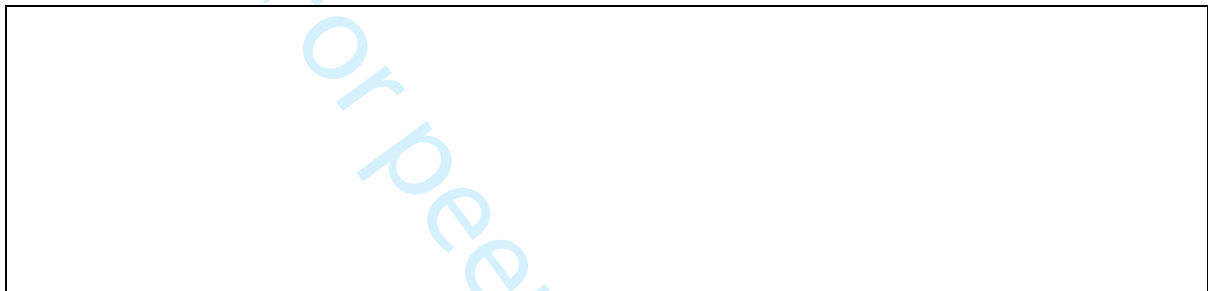

29  
30 Existence and content of any orientation materials, protocols, or guidelines related to how staff  
31 should work with companions, or on the role of companions. If no materials exist, please state this.  
32

33  
34  
35  
36  
37  
38  
39  
40  
41  
42  
43  
44



45  
46 Any other feedback, observations or reflections  
47

48  
49  
50  
51  
52  
53  
54  
55  
56  
57  
58  
59  
60

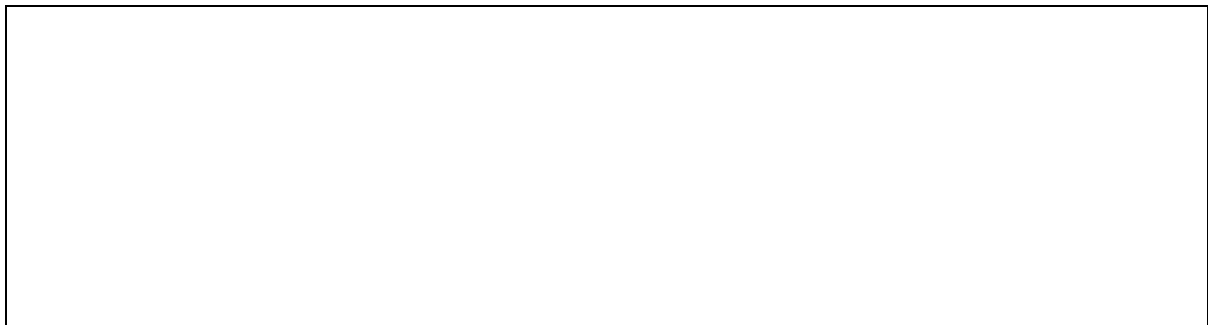

# BMJ Open

## Factors influencing the implementation of labour companionship: formative qualitative research in Thailand

|                                 |                                                                                                                                                                                                                                                                                                                                                                                                                                                                                                                                                                                                                                                                                                                                                                                                                                                                                                                                                                                                                                                                                                                                                                   |
|---------------------------------|-------------------------------------------------------------------------------------------------------------------------------------------------------------------------------------------------------------------------------------------------------------------------------------------------------------------------------------------------------------------------------------------------------------------------------------------------------------------------------------------------------------------------------------------------------------------------------------------------------------------------------------------------------------------------------------------------------------------------------------------------------------------------------------------------------------------------------------------------------------------------------------------------------------------------------------------------------------------------------------------------------------------------------------------------------------------------------------------------------------------------------------------------------------------|
| Journal:                        | <i>BMJ Open</i>                                                                                                                                                                                                                                                                                                                                                                                                                                                                                                                                                                                                                                                                                                                                                                                                                                                                                                                                                                                                                                                                                                                                                   |
| Manuscript ID                   | bmjopen-2021-054946.R1                                                                                                                                                                                                                                                                                                                                                                                                                                                                                                                                                                                                                                                                                                                                                                                                                                                                                                                                                                                                                                                                                                                                            |
| Article Type:                   | Original research                                                                                                                                                                                                                                                                                                                                                                                                                                                                                                                                                                                                                                                                                                                                                                                                                                                                                                                                                                                                                                                                                                                                                 |
| Date Submitted by the Author:   | 10-Feb-2022                                                                                                                                                                                                                                                                                                                                                                                                                                                                                                                                                                                                                                                                                                                                                                                                                                                                                                                                                                                                                                                                                                                                                       |
| Complete List of Authors:       | Rungreangkulkij, Somporn; Khon Kaen University Faculty of Nursing Ratinthorn, Ameporn; Mahidol University Faculty of Nursing Lumbiganon, Pisake; Khon Kaen University Faculty of Medicine, Obstetrics and Gynaecology<br>Zahroh, Rana; The University of Melbourne, Gender and Women's Health Unit, Centre of Health Equity, Melbourne School of Population and Global Health<br>Hanson, Claudia; Karolinska Institute, Public Health Sciences; London School of Hygiene and Tropical Medicine Faculty of Infectious and Tropical Diseases, Dept of Disease Control<br>Dumont, Alexandre; University of Paris, CEPED, Institute for Research on Sustainable Development, IRD-Université de Paris, ERL INSERM SAGESUD<br>de Loenzien, Myriam; Centre Population et Developpement, Betran, Ana Pilar; World Health Organization, 8. UNDP/UNFPA/UNICEF/World Bank Special Program of Research, Development and Research Training in Human Reproduction (HRP), Department of Sexual and Reproductive Health and Research<br>Bohren, Meghan ; University of Melbourne School of Population and Global Health, Gender and Women's Health Unit, Centre for Health Equity |
| <b>Primary Subject Heading</b>: | Global health                                                                                                                                                                                                                                                                                                                                                                                                                                                                                                                                                                                                                                                                                                                                                                                                                                                                                                                                                                                                                                                                                                                                                     |
| Secondary Subject Heading:      | Health policy, Health services research, Public health, Qualitative research                                                                                                                                                                                                                                                                                                                                                                                                                                                                                                                                                                                                                                                                                                                                                                                                                                                                                                                                                                                                                                                                                      |
| Keywords:                       | OBSTETRICS, PUBLIC HEALTH, International health services < HEALTH SERVICES ADMINISTRATION & MANAGEMENT, Quality in health care < HEALTH SERVICES ADMINISTRATION & MANAGEMENT, QUALITATIVE RESEARCH                                                                                                                                                                                                                                                                                                                                                                                                                                                                                                                                                                                                                                                                                                                                                                                                                                                                                                                                                                |
|                                 |                                                                                                                                                                                                                                                                                                                                                                                                                                                                                                                                                                                                                                                                                                                                                                                                                                                                                                                                                                                                                                                                                                                                                                   |

SCHOLARONE™  
Manuscripts



I, the Submitting Author has the right to grant and does grant on behalf of all authors of the Work (as defined in the below author licence), an exclusive licence and/or a non-exclusive licence for contributions from authors who are: i) UK Crown employees; ii) where BMJ has agreed a CC-BY licence shall apply, and/or iii) in accordance with the terms applicable for US Federal Government officers or employees acting as part of their official duties; on a worldwide, perpetual, irrevocable, royalty-free basis to BMJ Publishing Group Ltd ("BMJ") its licensees and where the relevant Journal is co-owned by BMJ to the co-owners of the Journal, to publish the Work in this journal and any other BMJ products and to exploit all rights, as set out in our [licence](#).

The Submitting Author accepts and understands that any supply made under these terms is made by BMJ to the Submitting Author unless you are acting as an employee on behalf of your employer or a postgraduate student of an affiliated institution which is paying any applicable article publishing charge ("APC") for Open Access articles. Where the Submitting Author wishes to make the Work available on an Open Access basis (and intends to pay the relevant APC), the terms of reuse of such Open Access shall be governed by a Creative Commons licence – details of these licences and which [Creative Commons](#) licence will apply to this Work are set out in our licence referred to above.

Other than as permitted in any relevant BMJ Author's Self Archiving Policies, I confirm this Work has not been accepted for publication elsewhere, is not being considered for publication elsewhere and does not duplicate material already published. I confirm all authors consent to publication of this Work and authorise the granting of this licence.

1

2 **Factors influencing the implementation of labour companionship: formative qualitative**

3

4 **research in Thailand**5 **Authors:**6 Somporn Rungreangkulkij<sup>1</sup>7 Ameporn Ratinthorn<sup>2</sup>8 Pisake Lumbiganon<sup>3</sup>9 Rana Islamiah Zahroh<sup>4</sup>10 Claudia Hanson<sup>5, 6</sup>11 Alexandre Dumont<sup>7</sup>12 Myriam de Loenzien<sup>7</sup>13 Ana Pilar Betrán<sup>8</sup>14 Meghan A. Bohren<sup>4\*</sup>

15 \* Corresponding author: Meghan A. Bohren meghan.bohren@unimelb.edu.au

16

17 **Affiliations:**

18 1. Faculty of Nursing, Khon Kaen University, Khon Kaen, Thailand

19 2. Faculty of Nursing, Mahidol University, Bangkok, Thailand

20 3. Department of Obstetrics and Gynaecology, Faculty of Medicine, Khon Kaen University, Khon  
21 Kaen, Thailand22 4. Gender and Women's Health Unit, Centre for Health Equity, School of Population and Global  
23 Health, University of Melbourne, Melbourne, Australia

24 5. Department of Global Public Health, Karolinska Institutet, Stockholm, Sweden

25 6. London School of Hygiene and Tropical Medicine, London, United Kingdom

26 7. CEPED, Institute for Research on Sustainable Development, IRD-Université de Paris, ERL INSERM  
27 SAGESUD, Paris, France28 8. UNDP/UNFPA/UNICEF/World Bank Special Program of Research, Development and Research  
29 Training in Human Reproduction (HRP), Department of Sexual and Reproductive Health and  
30 Research, World Health Organization, Geneva, Switzerland

31

## 32 Abstract

### 33 Introduction

34 WHO recommends that all women have the option to have a companion of their choice throughout  
35 labour and childbirth. Despite clear benefits of labour companionship, including better birth  
36 experiences and reduced caesarean section, labour companionship is not universally implemented.  
37 In Thailand, there are no policies for public hospitals to support companionship. This study aims to  
38 understand factors affecting implementation of labour companionship in Thailand.

### 39 Methods

40 This is formative qualitative research to inform the “Appropriate use of caesarean section through  
41 QUALity DECision-making by women and providers” (QUALI-DEC) study, to design, adapt and  
42 implement a strategy to optimize use of caesarean section. We use in-depth interviews and  
43 readiness assessments to explore perceptions of healthcare providers, women, and potential  
44 companions about labour companionship in eight Thai public hospitals. Qualitative data were  
45 analysed using thematic analysis, and narrative summaries of the readiness assessment were  
46 generated. Factors potentially affecting implementation were mapped to the Capability,  
47 Opportunity, and Motivation behaviour change model (COM-B).

### 48 Results

49 127 qualitative interviews and eight readiness assessments are included in this analysis. The  
50 qualitative findings were grouped in four themes: benefits of labour companions, roles of labour  
51 companions, training for labour companions, and factors affecting implementation. The findings  
52 showed that healthcare providers, women, and their relatives, all had positive attitudes toward  
53 having labour companions. The readiness assessment highlighted implementation challenges related  
54 to training the companion, physical space constraints, overcrowding, and facility policies, reiterated  
55 by the qualitative reports.

### 56 Discussion

57 If labour companions are well-trained on how to best support women, help them to manage pain,  
58 and engage with healthcare teams, it may be a feasible intervention to implement in Thailand.  
59 However, key barriers to introducing labour companionship must be addressed to maximise the  
60 likelihood of success mainly related to training and space. These findings will be integrated into the  
61 QUALI-DEC implementation strategies.

62



## 63 Thai abstract

### 64 บทนำ

65 องค์การอนามัยโลกมีข้อเสนอแนะว่าผู้หญิงทุกคนควรได้รับโอกาสให้มีทางเลือกที่จะมีเพื่อนช่วยคลอดดี  
66 ลอดระยะเวลาเจ็บครรภ์คลอดจนถึงเด็กคลอดออกมา ทั้ง ๆ  
67 ที่มีข้อมูลเกี่ยวกับประโยชน์ของการมีเพื่อนช่วยคลอดอย่างชัดเจน เช่น ประสบการณ์การคลอดที่ดี  
68 ลดอัตราการผ่าตัดคลอด แต่พบว่าการมีเพื่อนช่วยคลอดกลับไม่ได้ถูกนำมาใช้อย่างแพร่หลาย  
69 สำหรับประเทศไทยการมีเพื่อนช่วยคลอดยังไม่ถูกนำมาใช้กำหนดเป็นนโยบายสำหรับโรงพยาบาลในสังกัด  
70 กระทรวงสาธารณสุข การวิจัยนี้มีวัตถุประสงค์  
71 เพื่ออธิบายปัจจัยที่ส่งผลต่อการมีเพื่อนช่วยคลอดในประเทศไทย

### 72 วิธีการ

73 การวิจัยเชิงคุณภาพระยะกึ่งรูปนี้เพื่อใช้ในการให้ข้อมูล สำหรับ  
74 “โครงการวิจัยการตัดสินใจของผู้หญิงและผู้ให้บริการสุขภาพอย่างมีคุณภาพต่อการมีเพื่อนช่วยคลอด” (QUALI-DEC) study เพื่อนำมาใช้ออกแบบ การปรับวิธีการ และการลงปฏิบัติ  
75 เพื่อให้การผ่าตัดคลอดมีประโยชน์สูงสุด การศึกษานี้ใช้การเก็บข้อมูลโดยการสัมภาษณ์เชิงลึก  
76 การประเมินความพร้อม เพื่อทำความเข้าใจ การรับรู้ของผู้ให้บริการ ผู้หญิง  
77 และผู้ที่มีโอกาสเป็นเพื่อนช่วยคลอดเกี่ยวกับการมีเพื่อนช่วยคลอดจากโรงพยาบาลของรัฐ  
78 แปรโรงพยาบาล วิเคราะห์ข้อมูลโดยการวิเคราะห์ประเด็น และการพรรณนา  
79 วิเคราะห์ปัจจัยที่ส่งผลต่อการนำใช้เพื่อนช่วยคลอดตามกรอบ ความสามารถ โอกาส แรงจูงใจและ  
80 และการเปลี่ยนแปลงพฤติกรรม (COM-B)

### 82 ข้อค้นพบ

83 ข้อมูลที่ใช้ในการวิเคราะห์ครั้งนี้ได้มาจากการสัมภาษณ์จำนวน 127 คน และ  
84 จากแบบประเมินความพร้อมจากแปดโรงพยาบาล ข้อค้นพบจากงานวิจัยเชิงคุณภาพแบ่งออกได้เป็น  
85 สี่ประเด็น ดังนี้: ประโยชน์การมีเพื่อนช่วยคลอด บทบาทเพื่อนช่วยคลอด การฝึกอบรมเพื่อนช่วยคลอด  
86 และปัจจัยที่ส่งผลต่อการปฏิบัติ ข้อค้นพบแสดงให้เห็นว่า ผู้ให้บริการทางการแพทย์  
87 ผู้หญิงและญาติของพวกเธอ มีทัศนคติทางบวกต่อการมีเพื่อนช่วยคลอด  
88 ข้อมูลจากการประเมินความพร้อมและข้อมูลเชิงคุณภาพมีความสอดคล้องกันที่แสดงให้เห็นความท้าทาย  
89 ในการให้มีเพื่อนช่วยคลอดได้ คือ การฝึกอบรมเพื่อนช่วยคลอด ข้อจำกัดพื้นที่ทางกายภาพ การแออัด  
90 และนโยบายของโรงพยาบาล

### 91 การอภิปรายผล

1  
2  
3  
4  
5  
6  
7  
8  
9  
10  
11  
12  
13  
14  
15  
16  
17  
18  
19  
20  
21  
22  
23  
24  
25  
26  
27  
28  
29  
30  
31  
32  
33  
34  
35  
36  
37  
38  
39  
40  
41  
42  
43  
44  
45  
46  
47  
48  
49  
50  
51  
52  
53  
54  
55  
56  
57  
58  
59  
60

92 หากเพื่อนช่วยคลอดได้รับการฝึกอบรมอย่างดีเกี่ยวกับ วิธีการสนับสนุนให้กำลังใจผู้หญิง  
93 การช่วยลดความปวด และการติดต่อกับผู้ให้บริการ  
94 เป็นกิจกรรมที่สามารถนำใช้เพื่อนช่วยคลอดสำหรับโรงพยาบาลในประเทศไทยได้  
95 แต่อุปสรรคในการนำใช้เพื่อนช่วยคลอดจะต้องคำนึงถึงโอกาสที่จะเพิ่มการประสบความสำเร็จที่มีความสั  
96 มพันธ์กับการอบรมและพื้นที่ทางกายภาพ ข้อค้นพบนี้ได้ถูกนำเสนอในยุทธศาสตร์ของโครงการ the  
97 QUALI-DEC

For peer review only

## Strengths and limitations of this study

- Labour companionship has important benefits for the woman and baby, and is recommended by WHO. This is the first study to understand needs and preferences related to labour companionship, and map factors that might affect implementation of labour companionship in Thailand.
- We found that implementation of labour companionship is feasible if labour companions and health workers are well-trained on how to best support women and engage with one another. Addressing key barriers to introducing labour companionship can include changes to the physical environment, implementing facility-level policies on labour companionship, and context-specific solutions to minimise fears on lawsuits and infection.
- A key strength of our study is the triangulation of qualitative research and facility readiness assessments, and mapping of key factors affecting implementation of labour companionship to the COM-B model of behaviour change.
- Using the COM-B model to guide analysis, we show how to use our formative research findings to guide intervention design and support a systematic, targeted, and theory-based development of implementation strategies for labour companionship.
- While our research was conducted in eight public hospitals across different regions of Thailand, the findings may not be transferrable to all settings in Thailand, as most study hospitals were in urban settings with high caesarean section rates.

98

## 99 Introduction

100 Efforts to improve maternal health globally have shifted in recent years to improving quality of care.  
101 A critical component of quality of care is the person's 'experience of care', which the World Health  
102 Organization (WHO) has defined as ensuring that all pregnant people are treated with respect and  
103 dignity, have effective communication with health workers, and access to emotional support that  
104 meets their needs (1). Within labour and childbirth care, supporting women to have a labour  
105 companion of their choice present is an effective way to improve women's experiences by providing  
106 respectful care and emotional support (2, 3). Labour companionship refers to a person of the  
107 woman's choice, who accompanies the woman continuously throughout labour and childbirth;  
108 typically this is the woman's partner or husband, friend or family member (4). Labour  
109 companionship empowers women in several key ways: improving communication between women  
110 and health workers, helping women with non-pharmacological pain relief, acting as advocates to  
111 help voice the woman's preferences, providing practical support such as massage and hand-holding,  
112 and providing emotional support as a continuous presence (4).

113 Labour companionship has important benefits for both the woman and baby. A Cochrane  
114 intervention review analysed the impact of continuous support for women during labour and  
115 childbirth from 26 studies conducted with over 15,000 women in 17 countries, and found that  
116 women with continuous support were more likely to have a spontaneous vaginal birth, and less  
117 likely to report negative ratings of or feelings about their childbirth experience, or to have a  
118 caesarean birth (5). Women with labour companionship also have a shorter duration of labour and  
119 better five-minute Apgar scores for their babies. Based on this evidence, WHO recommends that all  
120 women have the opportunity to have a labour companion of their choice with them throughout  
121 labour and childbirth (3).

122 Despite clear evidence of benefit, implementation of labour companionship in health facilities across  
123 the world remains sub-optimal. A Cochrane qualitative evidence synthesis highlighted several factors  
124 affecting implementation, including women and health workers not recognizing the benefits of  
125 labour companionship, labour companionship viewed as a 'nice to have' but not essential service,  
126 physical space constraints on labour wards and thus difficulties to maintain privacy, and integrating  
127 labour companions into part of the care team (4).

## 128 Context of labour companionship in Thailand

129 In Thailand, labour companions are not typically allowed in most public and some private hospitals.  
130 Most public hospitals have a policy allowing women's relative to wait outside the labour room, with  
131 certain hours allocated to allow relatives or friends to visit the women in the labour room, typically  
132 during lunch or dinner time. Anecdotally, some reasons for not allowing labour companionship were  
133 the concern about infection risks (even prior to COVID-19) and maintaining the privacy of women,  
134 who normally share rooms, especially from other male companions. With increasing access to  
135 mobile phones, there are also emerging concerns about pictures and audio video recordings, which  
136 may be used in potential litigation cases against medical teams. Similar to the results of the  
137 Cochrane review, a quasi-experimental study in eastern Thailand compared the effect of  
138 companionship on primiparous women's experiences and found that women with companionship  
139 were more satisfied with their childbirth experiences, but no significant differences in self-reported  
140 suffering or ability to cope with labour pain (6).

## 141 The QUALI-DEC Project

142 In the context of sustained growing caesarean section rates in Thailand, the Ministry of Health and  
143 other stakeholders are examining factors underlying the increase and interventions to optimize its  
144 use. The QUALI-DEC study: "Appropriate use of caesarean section through **QUALITY DECISION**-making  
145 by women and providers" (7) aims to design, adapt and evaluate a multi-faceted strategy, for the  
146 appropriate use of caesarean section in Argentina, Burkina Faso, Thailand and Viet Nam. The QUALI-  
147 DEC strategy is designed to combine four key components: 1) Opinion leaders to implement  
148 evidence-based clinical guidelines; 2) Caesarean audits and feedback to help providers identify  
149 potentially avoidable caesarean sections; 3) A Decision Analysis Tool (DAT) to help women make an  
150 informed decision on mode of birth; and 4) Implementation of WHO recommendations on  
151 companionship during labour and childbirth (7). Labour companionship is included as a QUALI-DEC  
152 intervention component given the association between continuous support and increased chance of  
153 vaginal birth (5), as well as due to emerging evidence that companionship may improve women's  
154 experience of care and reduce mistreatment during childbirth (8, 9).

155 The QUALI-DEC strategy supports the woman to choose any person to act as her labour companion.  
156 The QUALI-DEC research team and implementation partners will co-develop and tailor a model for  
157 labour companionship in each hospital that includes information on 1) changing hospital policy to  
158 allow for labour companionship, 2) establishing eligibility criteria for women and companions, 2)  
159 identifying how health workers can help women to choose and train the labour companion, 3)  
160 defining how health workers engage with women and companions, how many companions are

1  
2  
3 161 allowed, and when they are present, 5) designing modifications for the physical space to  
4  
5 162 accommodate companions, and 6) developing educational tools for companions on how to support  
6  
7 163 women. Based on the formative research conducted among the local stakeholders in Thailand, the  
8  
9 164 aim of this paper is to describe the needs and preferences of women, potential companions, and  
10  
11 165 healthcare providers related to labour companionship, and to map factors that might affect  
12  
13 166 implementation of labour companionship in Thailand, using a behaviour change model.

## 14 167 **Methods**

17 168 This is a formative qualitative study using a health facility readiness assessment and in-depth  
18  
19 169 interviews (IDIs) with women, potential companions, and healthcare providers, described in detail in  
20  
21 170 the study protocol (10) and below. In short, the readiness assessment and IDIs explored the needs and  
22  
23 171 preferences of these key stakeholders to introduce labour companionship in each setting. During the  
24  
25 172 analysis, we conceptualised findings from the readiness assessment and IDIs as ‘factors potentially  
26  
27 173 affecting implementation of labour companionship’, and used behaviour change frameworks to map  
28  
29 174 the findings in order to better understand what is needed to develop effective intervention  
30  
31 175 implementation strategies. This paper is reported according to the consolidated criteria for reporting  
32  
33 176 qualitative research (COREQ) guidance (11).

34 177 Eight hospitals in Thailand were purposively selected for the QUALI-DEC project according to the  
35  
36 178 willingness to participate, programmatic activities, country priorities, and geographical representation  
37  
38 179 (Table 1). The formative research was conducted in these eight hospitals, where caesarean section  
39  
40 180 rate ranged from 34.3-56.9%.

## 41 181 **Participants and recruitment**

42  
43 182 Five groups of participants were identified for this study: 1) pregnant women, 2) postpartum women,  
44  
45 183 3) a person identified by the woman as someone she would have liked as a companion (potential  
46  
47 184 companions; before birth), 4) potential companions (after birth), and 5) healthcare providers (doctors,  
48  
49 185 nurse-midwives) and administrators or managers. Pregnant women and postpartum women aged 18  
50  
51 186 to 49 years who attended antenatal and/or postnatal care at the study hospitals were invited to  
52  
53 187 participate in in-depth interviews (IDIs), aiming for diversity (mix of urban or rural residence, parity,  
54  
55 188 age, and ethnicity - target per facility: 2-3 pregnant and 2-3 postpartum women). Initially, nurse-  
56  
57 189 midwives explored the interest of women during antenatal care or postnatal care visits, and if they  
58  
59 190 were potentially interested in participating, then the research team approached women face-to-face.  
60  
191 The pregnant and postpartum women who participated in the study identified a person who they

1  
2  
3 192 would have liked to be their labour companion (“potential companion”), and the research team  
4  
5 193 approached the potential companions face-to-face to participate in an IDI (target per facility: 2-3  
6  
7 194 potential companions before birth and 2-3 after birth). Typically, the potential companion was already  
8  
9 195 on the hospital grounds. Healthcare providers working on the antenatal, delivery and postnatal wards  
10  
11 196 of the study hospitals and healthcare administrators were contacted by the research team and invited  
12  
13 197 to participate in IDIs, with considerations for a diverse group based on age, gender and years of  
14  
15 198 working experience (target per facility: 2-3 nurse-midwives, 2-3 doctors, 2 administrators). We  
16  
17 199 prespecified the target sample size for each type of participant to account for the variable contexts  
18  
19 200 and patient populations in each facility. No participants approached refused to participate.

## 201 Data collection

202 After agreeing to participate and completing a consent form, the research team conducted IDIs in Thai  
23  
24 203 at the respective health facility. IDIs lasted 30-90 minutes, had no other people present, were audio-  
25  
26 204 recorded, and participants received 500 Baht (USD\$16) compensation for their time. General  
27  
28 205 conversation was initiated prior going to main interview questions to build rapport. Data were  
29  
30 206 collected from July to October 2020. All audio recordings were transcribed verbatim in Thai,  
31  
32 207 complemented with field notes. De-identified transcripts were stored on a password protected  
33  
34 208 computer. There was no further contact with the research participants after the IDI.

35 209 The interview guides were developed based on the implementation challenges identified in the  
36  
37 210 Cochrane qualitative review (4) and covered a range of topics including: 1) values and needs around  
38  
39 211 the childbirth period, 2) prenatal education, 3) preferences and decision-making processes regarding  
40  
41 212 mode of birth, and 4) labour companionship (Appendix 1: interview guide). Interview guides were  
42  
43 213 piloted and refined prior to data collection. This analysis focuses on the labour companionship  
44  
45 214 module.

46 215 In addition to IDIs, a readiness assessment was conducted to describe and assess the service delivery  
47  
48 216 context ahead of the intervention implementation, and was carried out concurrently with the IDIs  
49  
50 217 (Appendix 2: readiness assessment). The readiness assessment provides a systematic approach to  
51  
52 218 assessing readiness to engage in the implementation, in order to inform and tailor the interventions  
53  
54 219 in a way best suitable to the local context (10). Readiness assessments were conducted by members  
55  
56 220 of the QUALI-DEC research team who were professors of nursing, but not employed by the study  
57  
58 221 hospitals. During data collection, the researchers used a semi-structured form to observe the service  
59  
60 222 delivery context in each facility setting related to possibility or barriers for companionship

1  
2  
3 223 implementation such as the sign for visiting information, physical environment in latent room,  
4  
5 224 labour room, and post-partum room (10).  
6  
7

## 8 225 Reflexivity

9  
10 226 The QUALI-DEC research team consists of Thai and international social scientists, nurses, doctors, and  
11 227 epidemiologists with maternal health expertise. The research team believed that labour  
12 228 companionship is beneficial for women and families, and may help reduce caesarean section rates.  
13  
14 229 The research team was aware of their assumptions and mindful through the study process to mitigate  
15 230 any potentially negative biases that could influence participant responses or interpretations of  
16 231 responses. Six members of research team conducted the IDIs, all were female nursing professors with  
17 232 extensive qualitative experience, no prior relationship with any participants, and did not work at the  
18 233 study sites. Prior to starting data collection, the research team underwent a three-day training on  
19 234 caesarean section globally and in Thailand, QUALI-DEC project, and data collection and management.  
20  
21  
22  
23  
24  
25

## 26 235 Data analysis

27  
28  
29 236 Thematic analysis was performed by hand according to the following steps: organizing the data;  
30 237 generating categories, themes, patterns; testing emergent hypothesis; searching for alternative  
31 238 explanations (12). Four members of the research team were involved in the data analysis. First, the  
32 239 researchers repeatedly read the interview transcripts to develop initial codes of the data. Secondly,  
33 240 the researchers conducted a systematic identification of themes from the codes such as support,  
34 241 being a representative, and shorten labour. Thirdly, from the themes and codes, researchers identify  
35 242 emerging patterns from the data, such as benefits of having labour companion. Lastly, the  
36 243 researchers review the coded data extracts for each theme to consider whether they appear to form  
37 244 a coherent pattern. In this stage, the research team considered how the different themes were  
38 245 similar and different across different participant groups (e.g. women and healthcare providers), and  
39 246 explored hypothesis for why these similarities and differences may exist. If we found inadequacies  
40 247 in the initial coding and themes, we revisit the themes again and iterated on necessary changes  
41 248 when needed. For trustworthiness, during data analysis the findings were discussed among the  
42 249 research team and emergent findings were presented to a representative obstetrician (QUALI-DEC  
43 250 opinion leader) from the study settings. Key themes emerging from the IDIs were combined with  
44 251 data from the readiness assessment to identify and prioritize barriers, and to develop potential  
45 252 implications for implementation. Data analysis was conducted in Thai in order to retain the original  
46 253 meaning, and excerpts from the interview transcripts in this article were translated by a bilingual  
47 254 Thai-English translator who is a member of the research team.  
48  
49  
50  
51  
52  
53  
54  
55  
56  
57  
58  
59  
60



1  
2  
3 255 The research findings were then conceptualised as factors potentially affecting implementation, and  
4 mapped to the Capability, Opportunity, and Motivation model of behaviour change (COM-B) (13).  
5 256  
6 257 The COM-B model theorises that for a desired behaviour to occur (e.g. labour companionship),  
7  
8 258 individuals must have the capability, opportunity, and motivation to enact the behaviour. Capability  
9  
10 259 refers to factors such as attention, decision-making, knowledge, and skills (13). Opportunity refers to  
11  
12 260 how environments influence behaviour, and includes both physical (e.g. access to supplies and  
13  
14 261 resources, staffing, infrastructure) and social (e.g. team-work, support, practice norms, social and  
15  
16 262 professional identities) contexts (13). Motivation refers to the internal processes that direct and  
17  
18 263 encourage behaviours to occur or not, and includes factors such as perceived benefits, risks and  
19  
20 264 consequences, emotions, and priorities (13). The COM-B model has been widely used in  
21  
22 265 implementation research to improve implementation and to explore barriers and facilitators to  
23  
24 266 changing clinical practice. By identifying factors (e.g. barriers and facilitators) that may affect  
25  
26 267 implementation, teams can then design implementation strategies to address these factors and, in  
27  
28 268 turn, optimise the likelihood of successful implementation and potential for scale-up.

### 269 Ethical considerations

270 This research was approved by the Thai Central Research Ethics Committee (CREC) (COA-  
271 CREC020/2020), related university research ethics committees, and all hospital research ethics  
272 committees. Scientific and technical approval was obtained from the WHO Human Reproduction  
273 Programme (HRP) Review Panel on Research Projects (RP2), and ethical approval by the WHO Ethical  
274 Review Committee (protocol ID, 004571) and the French Research Institute for Sustainable  
275 Development. All participants provided written consent to participate and IDIs were conducted in a  
276 private place with no other people present.

### 277 Patient and public involvement

278 Patients and/or the public were not involved in the design, or conduct, or reporting, or dissemination  
279 plans of this research.

## 280 Results

281 From the eight participating hospitals, a total of 127 IDIs are included in this analysis: 27 pregnant  
282 women, 25 postpartum women, 16 potential companions, 8 facility administrators, 18 doctors and  
283 33 nurse-midwives working in maternity care. **Table 2** presents the sociodemographic characteristics  
284 of women and potential companions. Pregnant and postpartum women's ages ranged from 18 to 42  
285 years, almost all were married or cohabitating with a partner, and most were employed. Among  
286 pregnant women, about half were nulliparous, including two women who had planned for a

1  
2  
3 287 caesarean birth. Among postpartum women, at their most recent birth, about one-third had a  
4  
5 288 vaginal birth, and two-thirds had a caesarean birth. Almost all potential companions identified by the  
6  
7 289 women were their husbands, except one who was the woman's mother. **Table 3** presents the  
8  
9 290 sociodemographic characteristics of healthcare providers. There were 12 men (doctors and  
10  
11 291 administrators) and 59 women (14 female doctors/administrators; all nurse-midwives were women).

## 12 292 Contextual insights from the readiness assessment

13  
14  
15 293 Observations of the eight hospitals during the readiness assessment demonstrated space limitations  
16  
17 294 and crowding on the labour ward, typically with multiple beds in the same room, close together and  
18  
19 295 only divided by a curtain.

20  
21 296 There are differences in current visiting hours in the labour and delivery wards across the hospitals.  
22  
23 297 Two hospitals (hospitals 5 and 6) limit the visiting hours to three times a day, 1-2 hours in the  
24  
25 298 morning, noon, and evening. In contrast, the five other hospitals allow visitors from 11 AM- 8 PM,  
26  
27 299 but with limits on the number of visitors and duration of visits. Almost all hospitals allow only one  
28  
29 300 visitor to visit for 15-20 minutes at a time. There is only one hospital (hospital 8) that allows woman  
30  
31 301 who are in labour to visit the relatives at the ward reception area until 8 PM.

32  
33 302 Two hospitals (hospitals 5 and 6) provide onsite overnight accommodation for relatives. One hospital  
34  
35 303 (hospital 2) provides accommodation to the relatives only if the woman in labour is under 20 years  
36  
37 304 old. In addition, two hospitals (hospitals 1 and 8) have a room for the relatives to be with the woman  
38  
39 305 in labour until after the birth for extra charge.

40  
41 306 Discussions between the research team and clinical staff as part of the readiness assessment  
42  
43 307 suggested that a potential solution for seven hospitals would be to implement labour  
44  
45 308 companionship for some, but not all women. For example, if seven women are in labour at the  
46  
47 309 same time, labour companionship could be piloted with approximately two or three women  
48  
49 310 without compromising care for all women. In these hospitals, it may be possible to make more  
50  
51 311 private space for women during labour, for example by moving a woman who is in active labour  
52  
53 312 to the corner of the ward and using curtains that are already available. Hospital 5 had serious  
54  
55 313 concerns regarding the seriously limited space that might challenge the implementation of labour  
56  
57 314 companionship.

## 58 315 Qualitative findings related to labour companionship

59  
60 316 The findings showed that, in general, healthcare providers, women, and potential companions had  
317 positive attitudes about labour companionship. The qualitative findings are grouped in four

1  
2  
3 318 categories in the subsequent sections: 1) benefits of labour companions, 2) the roles of labour  
4 319 companions, 3) training for labour companions, and 4) factors affecting implementation.

## 7 320 1.0 Benefits of labour companions

9 321 Women, companions, and health workers expressed similar benefits and challenges of having labour  
10 322 companions, including 1) support, warmth and improved marital relationship, 2) having a  
11 323 representative to communicate with the medical team, 3) perception of clinical benefits, 4) labour  
12 324 companions as witnesses, 5) reduce the nursing workload in emotional support, and 6) labour  
13 325 companions may not be helpful. They have noticed the benefits of having the companion included  
14 326 shorten labour duration, to reduce caesarean section, to understand the work of medical team, to  
15 327 reduce the nurse-midwife's workload by being the woman's emotional supporter, and to provide  
16 328 opportunity for professional development. These benefits are outlined in the following sections.  
17 329 Recognition of the benefits of labour companionship are important facilitators for the *reflective* and  
18 330 *automatic motivation* domains of behaviour change, as they refer to the conscious thought  
19 331 processes (plans, evaluations) and habits or desires that influence motivation.

### 28 332 1.1 Support, warmth and improved marital relationship

29 333 Many women expressed that they feel anxious during the labour and birth. They feared the labour  
30 334 and birth process in the unfamiliar hospital environment. They experienced pain from contractions  
31 335 and worried about their safety and the baby's health. These women believed that having a  
32 336 companion might reduce fear and anxiety:

33 337 *It is very nice to have some support. Some people need emotional support, wanting to have*  
34 338 *some familiar faces around. They looked around - they saw only the strangers. If they could*  
35 339 *see the mom or the husband, they would have felt some support that at least they have a*  
36 340 *friend. Having companions is very beneficial.*

37 341 (Labour nurse-midwife 4, 7-years work experience, hospital 4)

38 342 *It's good to have a companion...have someone to talk to while waiting...I would have felt*  
39 343 *relaxed...But if I were to have someone with me, I would have felt less anxious and forgot the*  
40 344 *pain a little bit.*

41 345 (Postpartum woman 4, 35 years, hospital 4)

42 346 The participants from all groups said that having a labour companion present during the woman's  
43 347 labour and birth could improve the marital relationship if the husband was chosen to be a  
44 348  
45 349  
46 350  
47 351  
48 352  
49 353  
50 354  
51 355  
52 356  
53 357  
54 358  
55 359  
56 360

348 companion. The husband and wife could go through the experience of the labour pain, emotional  
349 journey together.

350 *Having my husband as a companion was very good. It's a very good bonding experience*  
351 *before the baby arrives. It's better for our family relationship.*

352 (Postpartum woman 10, 23 years, hospital 5)

353 *One of the good things about having the companion is that we can support and consult*  
354 *with each other. We can go through it and help each other along the way.*

355 (Husband 1, 29 years, hospital 8)

## 356 1.2 Representative to the medical team

357 Participants described how labour pain can affect the woman's decision-making, perceptions, and  
358 judgment. Therefore, having a companion during labour who was a family member could be useful  
359 to act as a representative to communicate with the medical team. This can improve effective  
360 communication of the women's needs and preferences.

361 *Many times, the patients are in so much pain. We couldn't really communicate with*  
362 *them...They couldn't make sound decisions. If they have a relative who can be their*  
363 *representative, it improves the communication and decision making.*

364 (Obstetrician 3, 10-years work experience, hospital 4)

365 *Having a companion is a good thing. They can be my representative, if something is wrong.*  
366 *They can get a nurse for me.*

367 (Postpartum woman 4, 35 years, hospital 4)

## 368 1.3 Perception of clinical benefits

369 Some healthcare providers believed that if women had good support, they would be able to manage  
370 their pain which, in turn, seem to help shorten the labour duration.

371 *One of the good things about having the companion is the smooth delivery...For example if*  
372 *the mom is with the patient, the mother might be able to support because the mother has*  
373 *experienced labour before. They can help the patient to follow the medical team's teaching*  
374 *like how to push correctly. The partner can help guide the patient to a successful labour.*

375 (Obstetrician-Administrator 2, 30-years work experience, hospital 4)

1  
2  
3 376 Moreover, some healthcare providers believed that when the women had good support, they may  
4  
5 377 manage the pain better than if they did not have a companion. This could result in fewer caesarean  
6  
7 378 births, as some women ask for caesarean because they no longer wish to tolerate the labour pain.

8  
9 379 *Having a companion with the woman seems to help with the surgery request [for caesarean*  
10  
11 380 *section]. When the women are in labour pain, they will have someone with them to distract*  
12  
13 381 *from the pain.... Many cases they ask for surgery because they are experiencing labour pain*  
14  
15 382 *and don't want to wait until the natural delivery.*

16 383 (Obstetrician 1, 11-years work experience, hospital 7)

#### 18 384 1.4 Labour companions at witnesses

20  
21 385 When the women's relatives stay with them throughout labour, they can witness the work of  
22  
23 386 medical personals directly. Healthcare workers described that when family members are present,  
24  
25 387 they tended to be more careful while working, which may therefore improve service quality.

26  
27 388 *It is like the companions are the quality assurance inspectors. They see how our system*  
28  
29 389 *works. It is like a two-way communication that we can improve the quality of our service.*

30  
31 390 (Labour nurse-midwife 13, 34-years work experience, hospital 6)

32  
33 391 Healthcare workers also felt the presence of companions could reduce some misunderstanding  
34  
35 392 about medical malpractice, as the companion could witness and understand the work of the medical  
36  
37 393 team which may lead to fewer lawsuits.

38  
39 394 *It's beneficial to have a labour companion. If there are any complications during the labour*  
40  
41 395 *and the delivery, they will see that we try our best. When they see that we are trying the best*  
42  
43 396 *we can, that might reduce the lawsuits. They have witnessed that we do pay attention. They*  
44  
45 397 *can participate in the care.*

46 398 (Obstetrician 2, 3-years work experience, hospital 7)

#### 48 399 1.5 Reduce the nursing workload in emotional support

50  
51 400 One of the nursing roles is providing emotional support to women during labour. The nurse-  
52  
53 401 midwives also monitor frequency of contractions and provide other nursing care. When there are  
54  
55 402 many women in labour, the nurse-midwives might not be able to provide close attention to every  
56  
57 403 woman, and emotional support in particular can be compromised. Having a labour companion who  
58  
59 404 has been trained on how to support women could therefore potentially reduce the nursing  
60  
405 workload.

1  
2  
3 406 *It helps reducing my workload.....I try to pay close attention to all my patients. I can do that*  
4  
5 407 *when I have only a few patients. But when the patient has a labour companion, I feel good*  
6  
7 408 *that my patients do receive intensive care, even though it's from the companion, not me.*

8  
9 409 (Labour nurse-midwife 14, 10-years work experience, hospital 6)

## 10 11 410 1.6 Labour companion may not be helpful

12  
13  
14 411 Most participants expressed the benefits of having labour companions. However, there were four  
15  
16 412 women who said that they did not need a labour companion, primarily because they believed that  
17  
18 413 during labour, nobody could help alleviate pain. These women believed that during labour, women  
19  
20 414 tended to have limited attention and negative moods.

21 415 *Either way is fine with me, having a companion or not. I am in labour. I will feel pain, no*  
22  
23 416 *matter I have someone with me or not. Having a companion isn't helping with my pain.*

24  
25 417 (Pregnant woman 13, 31 years, hospital 5)

26  
27 418 Moreover, one husband also said it was not helpful for him to be there. He said it is better for the  
28  
29 419 woman to be with the medical team, and feared to see her suffer.

30  
31 420 *I think I will not be a labour companion. I will wait outside the room. I don't want to be in the*  
32  
33 421 *way of the medical team. I am worried but I don't want to see her crying and suffering.*

34  
35 422 (Husband 3, 42 years, hospital 3)

## 36 37 38 423 2.0 The roles of labour companion

39  
40 424 Most healthcare workers said that the women should be the one who select their labour companion.  
41  
42 425 Most women preferred their husbands to be their labour companions, as they think that it will  
43  
44 426 enhance the family relationship, and a few women preferred their mothers as they viewed their  
45  
46 427 mothers' own labour experiences to be beneficial in supporting them. The participants from all  
47  
48 428 groups expressed the roles of the labour companion very similarly, to provide emotional support,  
49  
50 429 massage and support coping with pain, assisting with daily activities, and communicating with the  
51  
52 430 medical team.

53 431 *I would like someone who can be around and help out. Someone who holds me when I am in*  
54  
55 432 *pain. Someone who can help getting things for me when I can't really help myself. It is better*  
56  
57 433 *than being alone.*

58  
59 434 (Pregnant woman 10, 38 years, hospital 2)

1  
2  
3 435 The health workers also perceived that labour companions could play key roles in supporting them  
4  
5 436 to better care for the women in labour.

6  
7 437 *The first thing is to be my support. Other duties can be understanding the labour and delivery*  
8  
9 438 *process. So that person isn't in panic. If they notice any unusual symptoms, they can alert*  
10  
11 439 *the medical team. They should have the ability to observe and report any abnormality. I see*  
12  
13 440 *this person as a censor who detects problems.*

14  
15 441 (Obstetrician-Administrator 5, 20-years work experience, hospital 7)

16  
17 442 *I want to teach and train the companion. They should learn how to assess the labour pain,*  
18  
19 443 *where they can check or touch. They will be the one who communicates with the nurses that*  
20  
21 444 *the contraction is more frequent and intense. They can tell the nurses that the patient wants*  
22  
23 445 *to push already.*

24  
25 446 (Labour nurse-midwife 15, 5-years work experience, hospital 6)

26  
27 447 If labour companions were trained, for example during childbirth education classes or antenatal  
28  
29 448 visits, these health workers believed that they could help the woman to manage pain, and  
30  
31 449 communicate to the health workers if the woman needs help or is ready to push.

32  
33 450 These critical roles played by labour companions are important facilitators to the *psychological*  
34  
35 451 *capability* domain of behaviour change, which can influence the relationship between motivation  
36  
37 452 and enacting the behaviour (labour companionship). If labour companions are appropriately  
38  
39 453 equipped with the skills and knowledge to support women during labour, then they in turn have  
40  
41 454 increased motivation, and health workers may feel better able to integrate them into the care team.

### 42 455 3.0 Training the labour companion

43  
44 456 Participants expressed that potential labour companions should receive training to understand the  
45  
46 457 process of labour and how to best support the woman. Preparation of the labour companions could  
47  
48 458 be integrated into the existing antenatal classes. Most participants agreed that the training and  
49  
50 459 preparation for the labour companion should start in the third trimester, approximately week 32 of  
51  
52 460 the pregnancy. They should attend the class at least two times, for about 30-60 minutes. The key  
53  
54 461 content and skills for labour companions to learn during these sessions is how to provide emotional  
55  
56 462 support, pain management techniques, and understanding the process of labour. One female  
57  
58 463 participant said that the labour companion should understand the emotions while the woman is  
59  
60 464 going through labour pain so they can support the woman appropriately.

1  
2  
3 465 *The labour companion has to learn how to support the patient. We should teach them what*  
4 *labour is and the pain associate to the labour, how much pain, when to report to the medical*  
5 466 *team. For instance, if the patient's water broke, they have to let us know. If the patient*  
6 467 *wants to push, they have to report.*  
7  
8 468

9  
10 469 (Obstetrician 2, 3-years work experience, hospital 7)

11  
12  
13 470 *They have to learn the labour process. It will be somewhat a long process so they can help*  
14 471 *with the pain while waiting for the delivery. They can be a pushing coach. They have to be*  
15 472 *perceptive to our moods.*

16  
17  
18 473 (Postpartum woman 24, 21 years, hospital 1)

19  
20  
21 474 The husband of a pregnant woman echoed the desire for learning how to support his wife, and  
22 475 particularly how he could help ease her pain during labour:

23  
24  
25 476 *I want to learn what I should do, the process of getting on the labour and delivery wards,*  
26 477 *what to do when I am on the ward, how I can help my wife with the pain.*

27  
28  
29 478 (Husband 8, 35 years, hospital 1)

30  
31 479 Appropriate training of the labour companion is an important facilitator to the *physical* and  
32 480 *psychological capability* domains of behaviour change, which can increase *motivation*.

#### 33 34 35 481 4.0 Factors affecting implementation

36  
37  
38 482 While all participants noted the many benefits to having a labour companion, some barriers and  
39 483 challenges to implementing companionship were identified. These factors affecting implementation  
40 484 are important barriers and facilitators to *physical* and *social opportunity*, as they relate to creating  
41 485 enabling physical environments and influencing positive sociocultural norms. Many labour and  
42 486 delivery wards in public hospitals are not designed to accommodate labour companions, as the  
43 487 wards are already crowded with women in labour. Consequently, four main barriers were identified  
44 488 by participants: 1) maintaining privacy and confidentiality, 2) increased risk of infection, 3) risk of  
45 489 lawsuits, and 4) perceived additional work for health workers to support companions. Maintaining  
46 490 privacy was already a challenge without labour companions, as the labour ward beds are close  
47 491 together, in a narrow and crowded room. In Thai culture, it is improper for women's bodies to be  
48 492 exposed; therefore, if a labour companion is a male, it may be uncomfortable for other women in  
49 493 labour at the same time.



1  
2  
3 494 *Our hospital is a public hospital, not a private one. When the patients in labour, waiting to*  
4 *deliver, they are in their bed with a curtain as a divider between beds. There is no privacy. It's*  
5 495 *difficult for me to work and to protect my patients' privacy. For example, I am trying to do*  
6 496 *the pelvic exam but the next bed has a husband accompany her. The voices can travel*  
7 *through. It's difficult to work.*

8  
9  
10 498  
11  
12 499 (Obstetrician 4, 2-years work experience, hospital 4)

13  
14 500 In addition to the challenges of physical privacy, some participants also feared that having more  
15 501 visitors and relatives on the ward will be difficult for the medical team to protect the confidential  
16 502 information of patients.

17  
18 503 *I am very afraid of the risk of the confidentiality violation. The companions might talk about*  
19 504 *other patients to other people. I am very worried about this.*

20  
21  
22 505 (Antenatal nurse-midwife 9, 21-years work experience, hospital 3)

23  
24 506 Participants, particularly healthcare providers, expressed concerns about increased risks of infection,  
25 507 as the ward is usually crowded with women in labour. Adding the labour companion could lead to  
26 508 the increased risk of infection spread (referring to non-COVID-19 infection).

27  
28 509 *I think it's kind of risky for the infection. People wear their normal clothing, not sterile. That*  
29 510 *might increase the infection spread.*

30  
31  
32 511 (Labour nurse-midwife 2, 3-years work experience, hospital 7)

33  
34 512 Healthcare providers expressed concern that the presence of a labour companion may lead to  
35 513 misunderstanding and lawsuits. They worried that while they are providing care, the companions  
36 514 might think that the medical team are disorganized and in chaos, and that people may post these  
37 515 issues on social media. These misunderstandings and miscommunications had the potential to lead  
38 516 to lawsuits.

39  
40 517 *When I am on duty, I have to be more careful. My co-workers also warn me about this. For*  
41 518 *instance, I might be using my smartphone playing on my break but the relatives think I am*  
42 519 *not helping the patient who are yelling from pain. If they record and pose on social media,*  
43 520 *people see and misunderstand that I am not doing my job. Having a labour companion is like*  
44 521 *a two way sword. It has good and bad points.*

45  
46  
47 522 (Labour nurse-midwife 14, 10-years work experience, hospital 6)

1  
2  
3 523 Lastly, many of the study hospitals had high ratios of women to healthcare providers, and healthcare  
4  
5 524 providers feared that introducing companions to the ward may increase their workloads.

6  
7 525 *The objective of having a labour companion is to have someone to help us. But I doubt that*  
8  
9 526 *the person can really help me. I have to explain and communicate more. It will double the*  
10  
11 527 *communication times because I not only communicate with a patient, I have to communicate*  
12  
13 528 *with the relatives.*

14  
15 529 (Labour nurse-midwife 6, 3-years work experience, hospital 2)

16  
17 530 For successful implementation of companionship, these barriers would need to be considered and  
18  
19 531 addressed in the implementation strategy. However, despite the barriers, the participants,  
20  
21 532 particularly healthcare providers, believed that the potential benefits of introducing labour  
22  
23 533 companionship would outweigh the risks, suggesting that labour companionship was highly  
24  
25 534 acceptable.

26 535 *I think it's possible to implement the labour companion policy because of the substantial*  
27  
28 536 *benefits. It is easily acceptable. When there are many evidence-based research that show the*  
29  
30 537 *benefits of having the labour companion can reduce the active and the second phase of the*  
31  
32 538 *labour, they will change the policy and practice.*

33 539 (Obstetrician 8, 3-years work experience, hospital 5)

34  
35  
36 540 *If there is a policy to include the labour companion, I think it's possible to follow. They have*  
37  
38 541 *to provide the space. When the direct order comes to the hospital to do it, they will set up*  
39  
40 542 *more private space. I think it's possible. There shouldn't be any problems.*

41 543 (Obstetrician-Administrator 1, 35-years work experience, hospital 7)

## 44 544 Understanding factors affecting implementation using the COM-B model

45  
46 545 **Figure 1** maps the potential factors affecting implementation from the qualitative interviews and  
47  
48 546 readiness assessment to the COM-B model of behaviour change. The defined behaviour is that all  
49  
50 547 women have the option to have a companion of their choice throughout labour and childbirth. In  
51  
52 548 short, to improve *capability* to have a labour companion, potential labour companions should be  
53  
54 549 well trained and prepared on how to support women throughout labour and birth, and measures  
55  
56 550 may need to be taken to improve privacy. To improve *motivation* to have a labour companion, all  
57  
58 551 stakeholders (women, potential companions, and healthcare providers) should be knowledgeable  
59  
60 552 about the benefits of companions and how to efficiently integrate them into care, and trust-building  
553  
554 553 between healthcare users and healthcare providers may need to take place in contexts with fear of

1  
2  
3 554 litigation. To improve *opportunity* to have a labour companion, labour wards may need to be  
4  
5 555 physically reorganised to optimise space for a companion and woman to interact, revisions may be  
6  
7 556 needed to allow consistent visitation rights for companions regardless of day or time, and facility or  
8  
9 557 public policies may need revision to encourage companionship. To optimise the likelihood for this  
10  
11 558 behaviour to occur in the QUALI-DEC hospitals in Thailand, the implementation strategies should  
12  
13 559 ensure that the key barriers identified are addressed, and that the facilitators are present and  
14  
15 560 encouraged in all sites.

## 16 561 Discussion

17  
18  
19 562 We found that healthcare providers, women, and potential companions in eight public hospitals in  
20  
21 563 Thailand had generally positive attitudes towards having labour companions, and particularly belief  
22  
23 564 that labour companions would provide beneficial psychological and physical support for the women.  
24  
25 565 However, we identified some opportunities and threats to implementing labour companionship for  
26  
27 566 all women. Training the labour companion, for instance through childbirth education classes or  
28  
29 567 attendance at antenatal visits, was important to ensure that the companion knew how to support  
30  
31 568 the woman and understood what to expect during labour and birth. Limited physical space on the  
32  
33 569 labour wards, overcrowding, and multiple beds in the same labour room were major concerns to  
34  
35 570 introducing labour companionship. While policies at the hospital and national level do not currently  
36  
37 571 mention labour companionship, changes are more likely to be made at the hospital-level. For  
38  
39 572 example, current restrictions on the timing of visitations and number of visitors allowed may  
40  
41 573 challenge the implementation of labour companionship, and may need to be adjusted prior to  
42  
43 574 implementation to ensure that companions are not subjected to visitor restrictions.

44  
45 575 A key facilitator related to the social opportunities is that historically in Thai culture, childbirth  
46  
47 576 occurred at home where the woman was surrounded by her family, and strong values and happiness  
48  
49 577 in welcoming a new family member. Introducing labour companionship for births occurring in health  
50  
51 578 facilities may therefore reflect the values and cultural appropriateness of having a woman's social  
52  
53 579 network supporting her during labour and birth. While there are important barriers to address,  
54  
55 580 namely around policies, training, and reorganisation of the physical environment for birth, social  
56  
57 581 opportunities and psychological capabilities that value companionship are critical which appear to  
58  
59 582 be present in Thai culture. These facilitators and barriers are remarkably similar to an  
60  
583 implementation study conducted in public hospitals in Egypt, Lebanon, and Syria, where women and  
584  
585 families highly valued companion support, but health workers identified critical organisational  
factors such as limited physical space, lack of training of companions, and limited policy engagement

1  
2  
3 586 as barriers to successful implementation (14, 15). The implementation study in Egypt, Lebanon, and  
4  
5 587 Syria used participatory engagement through engagement with hospital leaders, seminars with  
6  
7 588 healthcare providers, communications materials for companions, and changes to the physical space  
8  
9 589 (chairs for companions, curtains around beds, access to hot water and toilets, and disposable gowns  
10  
11 590 and nametags for companions) to address these barriers (14), which may also be a useful approach  
12  
13 591 to inform the QUALI-DEC implementation.

14 592 Afulani and colleagues similarly explored women and health workers' perceptions of labour  
15  
16 593 companionship in a public maternity unit in rural Kenya, and identified similar facilitators to labour  
17  
18 594 companionship and roles that labour companions could play (16). In contrast to our findings, the  
19  
20 595 Kenyan study identified additional social barriers, including women's belief that companions cannot  
21  
22 596 help them, embarrassment to have a non-health worker see them during labour, and fears that the  
23  
24 597 labour companion would gossip about what they saw during the birth to others or that the labour  
25  
26 598 companion may abuse the woman during labour (16). While we did not identify these social barriers  
27  
28 599 to implementation, it is possible that particularly the embarrassment and fears of gossip and abuse  
29  
30 600 may be present in more rural areas of Thailand (all QUALI-DEC study hospitals are in urban areas and  
31  
32 601 therefore may not be as influenced by these factors present in smaller communities).

32 602 Most women and companions believed a partner or husband to be the optimal companion, believing  
33  
34 603 that witnessing the pain and supporting during the difficult time could strengthen the family bonding  
35  
36 604 including the father and the baby, which was consistent with previous studies (4, 17). Only a few  
37  
38 605 women preferred her mother as a companion. This finding is different from other women in India  
39  
40 606 and Bangladesh, most those women wanted their mothers to be a companion (18, 19). Having a  
41  
42 607 female companion, especially a mother, could yield other benefits, as they can share her own  
43  
44 608 experiences of childbirth, which could serve as encouragement to women. We note that cultural and  
45  
46 609 gender norms may influence the choice of a companion, and that ultimately the woman herself  
47  
48 610 should be the person who chooses who will support her.

48 611 There are several key implications for research, practice, and implementation of the QUALI-DEC  
49  
50 612 study. We plan to use opinion leaders (influential and respected healthcare leaders who are  
51  
52 613 effective communicators, and identified by their colleagues or local authorities) at each study  
53  
54 614 hospital to help support implementation (7). We plan to engage with the opinion leaders during an  
55  
56 615 intensive, five-day pre-study training workshop, where we will present the results of this formative  
57  
58 616 research and engage to design strategies to optimise implementation (7). Engaging with the opinion  
59  
60 617 leaders about the benefits of labour companionship and co-designing strategies to address barriers  
618  
619 618 to implementation that are feasible and acceptable in their clinical settings will be critical. For

1  
2  
3 619 example, we will explore how to assuage healthcare providers' fears that introducing companions  
4  
5 620 will result in higher workloads, potentially through training solutions to help healthcare providers  
6  
7 621 understand benefits of companions and how to integrate them in their care – a similar approach to  
8  
9 622 Kabakian-Khasholian and colleagues (14). Similarly, we will discuss how to negotiate improving  
10  
11 623 accountability of the health system to women and their families, with the potential risk that  
12  
13 624 instances of poor quality of care are shared on social media by companions.

14 625 Moreover, we expect that at a minimum, some reorganisation of the physical space of the labour  
15  
16 626 ward will be needed, for example introducing chairs, developing plans to mitigate the risk of  
17  
18 627 overcrowding, and supplying curtains where necessary to enhance privacy. Likewise, some facility  
19  
20 628 policies may need to be adjusted to change restrictions on visiting hours for the labour ward to  
21  
22 629 ensure that companions are not subjected to visitor restrictions. More work will be needed to  
23  
24 630 explore how to engage with labour companions during the antenatal period, and information,  
25  
26 631 education, and communications (IEC) materials are underdevelopment to communicate how  
27  
28 632 companions can support women and how health workers can engage them in care. The findings  
29  
30 633 from this study have informed what type of material should be included in IEC materials for women  
31  
32 634 and families, as well as health providers. For example, helping to clarify what to expect from a labour  
33  
34 635 companion, how labour companions can help before, during, and after the birth, and practical  
35  
36 636 information to help labour companions support women to the best of their abilities.

37 637 Our study had both limitations and strengths. While we aimed to include diverse public hospitals  
38  
39 638 across different regions of Thailand, the findings may not be transferable to all settings in Thailand,  
40  
41 639 including Southern Thailand where we could not include any hospitals. All study hospitals were in  
42  
43 640 urban settings and generally hospitals with relatively high caesarean section rates, so there may be  
44  
45 641 limited transferability to rural settings or settings with lower caesarean section rates. We collected  
46  
47 642 the data during the COVID-19 pandemic, which may have introduced additional barriers to  
48  
49 643 implementation around people's presence on the labour wards (during the data collection period  
50  
51 644 July to October 2020, there were typically less than 10 COVID-19 cases per day in Thailand). We note  
52  
53 645 that WHO COVID-19 clinical management guidance recommends that during the pandemic, all  
54  
55 646 women should have access to woman-centred, respectful care, including a companion of their  
56  
57 647 choice; this includes women with suspected, probably, or confirmed COVID-19 (20). Key strengths of  
58  
59 648 our study include triangulation of results from qualitative research and the facility readiness  
60  
61 649 assessment, and mapping of key factors affecting implementation to the COM-B model to guide  
62  
63 650 decision-making during QUALI-DEC intervention design and support a systematic, targeted, and  
64  
65 651 theory-based development of implementation strategies.

1  
2  
3 652 **Conclusion**  
4  
5

6 653 Labour companionship is viewed by women, potential companions, and health workers as highly  
7 654 beneficial and acceptable in the Thai context. If labour companions are well-trained on how to best  
8 655 support women, help them to manage pain, and engage with healthcare teams, it may be a feasible  
9 656 intervention to implement in the study hospitals. However, key barriers to introducing labour  
10 657 companionship must be addressed to maximise the likelihood of success. This includes changes to  
11 658 the physical environment in the labour ward to ensure that privacy can be adequately maintained  
12 659 and that there is space for companions to comfortably support women. Facility-level policies may  
13 660 need adjustment, particularly around visitation hours and where companions are not restricted.  
14 661 Context-specific solutions may need to be developed to assuage health worker concerns about  
15 662 potential misunderstandings, lawsuits, or reputational risks stemming from the introduction of  
16 663 labour companionship. Health workers will also need training to understand how to engage with  
17 664 labour companionships as part of a woman's care team, to minimise the risk of role encroachment  
18 665 and understand how companionship can be mutually beneficial. These key findings will be  
19 666 considered and deliberated on when developing the QUALI-DEC implementation strategies for  
20 667 introducing labour companionship.  
21  
22  
23  
24  
25  
26  
27  
28  
29  
30  
31  
32  
33  
34  
35 669  
36  
37  
38  
39  
40  
41  
42  
43  
44  
45  
46  
47  
48  
49  
50  
51  
52  
53  
54  
55  
56  
57  
58  
59  
60

## Acknowledgements

We thank the woman, potential companions, and health workers for their valuable time, and are grateful to the social scientist team for their hard work in data collection: Nilubon Rujiraprasert, Sasitara Nuampa, Natthapat Buaboon, Waraluk Kittiwatanapaisan, and Dasavanh Bounmany. We are indebted to Miss Nampet Jampathong for her professionalism as a project coordinator during the data collection process and her assistance in data transcription.

## Funding statement

This study is part of the QUALI-DEC-project which is co-funded by the European Union's Horizon 2020 research and innovation programme under grant agreement No 847567, and by UNDP-UNFPA-UNICEF-WHO-World Bank Special Programme of Research, Development and Research Training in Human Reproduction (HRP), a cosponsored programme executed by the World Health Organization (WHO) in the Department of Sexual and Reproductive Health and Research (SRH). The contents of this article are solely the responsibility of the authors and do not reflect the views of the EU, UNDP, UNFPA, UNICEF, WHO or the World Bank.

## Contributorship statement

SR, AR, PL, CH, AD, MdL, APB and MAB designed the study. SR, AR, and PL led data collection with support from CH, AD, MdL, APB and MAB. SR led data analysis with support from RZ and MAB. SR and MAB drafted the manuscript, and all authors reviewed the manuscript.

## Data sharing statement

No additional data available.

## Patient and public involvement

Patients and/or the public were not involved in the design, or conduct, or reporting, or dissemination plans of this research.

## Competing Interests

None declared.

1  
2  
3  
4  
5  
6  
7  
8  
9  
10  
11  
12  
13  
14  
15  
16  
17  
18  
19  
20  
21  
22  
23  
24  
25  
26  
27  
28  
29  
30  
31  
32  
33  
34  
35  
36  
37  
38  
39  
40  
41  
42  
43  
44  
45  
46  
47  
48  
49  
50  
51  
52  
53  
54  
55  
56  
57  
58  
59  
60

698

For peer review only



699 

## References

- 700 1. Tunçalp Ö, Were WM, MacLennan C, Oladapo OT, Gülmezoglu AM, Bahl R, et al. Quality of  
701 care for pregnant women and newborns-the WHO vision. *Bjog*. 2015;122(8):1045-9.
- 702 2. World Health Organization. Companion of choice during labour and childbirth for improved  
703 quality of care. World Health Organization; 2020 2020.
- 704 3. World Health Organization. WHO recommendations: intrapartum care for a positive  
705 childbirth experience. World Health Organization; 2018 2018. Report No.: 978-92-4-155021-5.
- 706 4. Bohren MA, Berger BO, Munthe-Kaas H, Tunçalp Ö. Perceptions and experiences of labour  
707 companionship: a qualitative evidence synthesis. *The Cochrane database of systematic reviews*.  
708 2019;3(3):Cd012449.
- 709 5. Bohren MA, Hofmeyr GJ, Sakala C, Fukuzawa RK, Cuthbert A. Continuous support for women  
710 during childbirth. *The Cochrane database of systematic reviews*. 2017;7(7):Cd003766.
- 711 6. Jaroensook C. Effects of Labor Support by a Female Relative on Suffering from Labor Pain,  
712 Coping with Labor Pain, and Satisfaction with Childbirth Experiences Among Primiparous Parturients.  
713 *The Journal of Faculty of Nursing Burapha University*. 2019;26(2):67-75.
- 714 7. Dumont A, Betrán AP, Kaboré C, de Loenzien M, Lumbiganon P, Bohren MA, et al.  
715 Implementation and evaluation of nonclinical interventions for appropriate use of cesarean section  
716 in low- and middle-income countries: protocol for a multisite hybrid effectiveness-implementation  
717 type III trial. *Implementation Science*. 2020;15(1):72.
- 718 8. Balde MD, Nasiri K, Mehrtash H, Soumah A-M, Bohren MA, Diallo BA, et al. Labour  
719 companionship and women's experiences of mistreatment during childbirth: results from a multi-  
720 country community-based survey. *BMJ global health*. 2020;5(Suppl 2):e003564.
- 721 9. Singh S, Goel R, Gogoi A, Caleb-Varkey L, Manoranjini M, Ravi T, et al. Presence of birth  
722 companion—a deterrent to disrespectful behaviours towards women during delivery: an exploratory  
723 mixed-method study in 18 public hospitals of India. *Health Policy and Planning*. 2021;36(10):1552-  
724 61.
- 725 10. Bohren MA, Opiyo N, Kingdon C, Downe S, Betrán AP. Optimising the use of caesarean  
726 section: a generic formative research protocol for implementation preparation. *Reproductive health*.  
727 2019;16(1):170.
- 728 11. Tong A, Sainsbury P, Craig J. Consolidated criteria for reporting qualitative research (COREQ):  
729 a 32-item checklist for interviews and focus groups. *International Journal for Quality in Health Care*.  
730 2007;19(6):349-57.
- 731 12. Braun V, Clarke V. Using thematic analysis in psychology. *Qualitative Research in Psychology*.  
732 2006;3(2):77-101.
- 733 13. Michie S, Van Stralen MM, West R. The behaviour change wheel: a new method for  
734 characterising and designing behaviour change interventions. *Implementation science*. 2011;6(1):42.
- 735 14. Kabakian-Khasholian T, Bashour H, El-Nemer A, Kharouf M, Elsheikh O, the Labour  
736 Companionship Study G. Implementation of a labour companionship model in three public hospitals  
737 in Arab middle-income countries. *Acta Paediatrica*. 2018;107(S471):35-43.
- 738 15. Kabakian-Khasholian T, El-Nemer A, Bashour H. Perceptions about labor companionship at  
739 public teaching hospitals in three Arab countries. *International journal of gynaecology and  
740 obstetrics: the official organ of the International Federation of Gynaecology and Obstetrics*.  
741 2015;129(3):223-6.
- 742 16. Afulani P, Kusi C, Kirumbi L, Walker D. Companionship during facility-based childbirth: results  
743 from a mixed-methods study with recently delivered women and providers in Kenya. *BMC  
744 pregnancy and childbirth*. 2018;18(1):150-.
- 745 17. Kabakian-Khasholian T, Portela A. Companion of choice at birth: factors affecting  
746 implementation. *BMC Pregnancy and Childbirth*. 2017;17(1):265.
- 747 18. Bangal V, Bayaskar V, Arjun A, Khan I, Thorat U. Opinions of pregnant women regarding  
748 desire and choice of labour companion. *Women's Health*. 2018;7.

1  
2  
3  
4  
5  
6  
7  
8  
9  
10  
11  
12  
13  
14  
15  
16  
17  
18  
19  
20  
21  
22  
23  
24  
25  
26  
27  
28  
29  
30  
31  
32  
33  
34  
35  
36  
37  
38  
39  
40  
41  
42  
43  
44  
45  
46  
47  
48  
49  
50  
51  
52  
53  
54  
55  
56  
57  
58  
59  
60

749 19. Perkins J, Rahman AE, Mhajabin S, Siddique AB, Mazumder T, Haider MR, et al. Humanised  
750 childbirth: the status of emotional support of women in rural Bangladesh. *Sexual and Reproductive*  
751 *Health Matters*. 2019;27(1):228-47.  
752 20. World Health Organization. *Clinical management of COVID-19 patients: Living guidance*.  
753 Geneva, Switzerland: World Health Organization; 2021.

For peer review only

## Figures and Tables

Table 1. Study sites in Thailand

| Hospital # | Region             | Type of hospital         | # of births per year (2020) | Caesarean section rate (2020) |
|------------|--------------------|--------------------------|-----------------------------|-------------------------------|
| Hospital 1 | Central Thailand   | Public hospital          | 4,431                       | 43.6%                         |
| Hospital 2 | Central Thailand   | Public hospital          | 4,605                       | 34.3%                         |
| Hospital 3 | Central Thailand   | Public teaching hospital | 5,203                       | 48.5%                         |
| Hospital 4 | Northeast Thailand | Public teaching hospital | 1,727                       | 42.5%                         |
| Hospital 5 | Northeast Thailand | Public hospital          | 4,756                       | 43.6%                         |
| Hospital 6 | Northeast Thailand | Public hospital          | 3,361                       | 49.2%                         |
| Hospital 7 | Northern Thailand  | Public hospital          | 5,025                       | 50.1%                         |
| Hospital 8 | Eastern Thailand   | Public hospital          | 3,268                       | 56.9%                         |

Table 2. Sociodemographic of participants: women and potential companions

|                                          | Pregnant women | Postpartum women | Potential companions |
|------------------------------------------|----------------|------------------|----------------------|
| <b>Total number of participants</b>      | 27             | 25               | 16                   |
| <b>Age (years)</b>                       |                |                  |                      |
| 18-24                                    | 8              | 4                | 0                    |
| 25-30                                    | 9              | 9                | 4                    |
| 31-42                                    | 10             | 12               | 10                   |
| 43-59                                    | 0              | 0                | 2                    |
| <b>Marital status</b>                    |                |                  |                      |
| Single                                   | 0              | 0                | 0                    |
| Married/cohabitating                     | 26             | 25               | 15                   |
| Divorced/widowed                         | 1              | 0                | 1                    |
| <b>Occupation</b>                        |                |                  |                      |
| Government officer                       | 3              | 2                | 0                    |
| Business owner                           | 8              | 5                | 5                    |
| Employed (other)                         | 8              | 11               | 10                   |
| Unemployed                               | 8              | 7                | 1                    |
| <b>Parity and planned mode of birth</b>  |                |                  |                      |
| Nulliparous (no planned CS)              | 10             | -                | -                    |
| Nulliparous (planned CS)                 | 2              | -                | -                    |
| Multiparous (no planned CS)              | 9              | -                | -                    |
| Multiparous (planned CS)                 | 6              | -                | -                    |
| <b>Mode of birth (most recent birth)</b> |                |                  |                      |
| Vaginal birth                            | -              | 8                | -                    |
| CS                                       | -              | 17               | -                    |

CS: caesarean section

Table 3. Sociodemographic of participants: health care providers

|                                        | Administrators | Doctors | Nurse-midwives |
|----------------------------------------|----------------|---------|----------------|
| <b>Total number of participants</b>    | 8              | 18      | 33             |
| <b>Gender</b>                          |                |         |                |
| Female                                 | 2              | 12      | 33             |
| Male                                   | 6              | 6       | 0              |
| <b>Years working in total</b>          |                |         |                |
| 1-5                                    | 0              | 7       | 8              |
| 6-10                                   | 0              | 5       | 2              |
| 11-15                                  | 0              | 2       | 1              |
| 16-20                                  | 1              | 2       | 5              |
| 21-25                                  | 0              | 1       | 5              |
| 26-30                                  | 4              | 1       | 4              |
| ≥ 31                                   | 3              | 0       | 8              |
| <b>Years working at study facility</b> |                |         |                |
| 1-5                                    | 0              | 11      | 10             |
| 6-10                                   | 0              | 1       | 5              |
| 11-15                                  | 0              | 3       | 4              |
| 16-20                                  | 1              | 2       | 4              |
| 21-25                                  | 0              | 0       | 4              |
| 26-30                                  | 4              | 1       | 3              |
| ≥ 31                                   | 3              | 0       | 3              |

1  
2  
3 **Figure 1. Mapping the factors affecting implementation of labour companionship in**  
4 **Thailand to the COM-B model of behaviour change.** This figure maps the factors affecting labour  
5 companionship from the qualitative research findings and readiness assessment to the COM-B model of  
6 behaviour change. The COM-B model is a useful way to identify what changes need to occur for an  
7 intervention – such as companionship – to be effective. Developing implementation strategies that capitalise  
8 on the facilitators and address the barriers to capability, opportunity, and motivation is a critical next step for  
9 the QUALI-DEC project.  
10  
11  
12  
13

14 [insert figure 1 here]  
15  
16  
17

18 Footnote to figure 1:  
19

20 Data coming from: \* = women, <sup>y</sup> = labour companion, † = doctors, ‡ = nurse-midwives, R = readiness  
21 assessment  
22  
23  
24  
25  
26  
27  
28  
29  
30  
31  
32  
33  
34  
35  
36  
37  
38  
39  
40  
41  
42  
43  
44  
45  
46  
47  
48  
49  
50  
51  
52  
53  
54  
55  
56  
57  
58  
59  
60



## Appendix 1. In-depth interview guides

This file contains the in-depth interview guides for all participant groups in this study:

1. Pregnant women (page 2)
2. Postpartum women (page 6)
3. Potential companions before birth (page 11)
4. Potential companions after birth (page 15)
5. Health workers (page 19)

For peer review only



## In-depth interview: pregnant women

**Step 1:** Introduce yourself to the participant. Describe the purpose of the interview and how information will be used. Obtain oral/written consent.

**Step 2:** Ask the participant to identify herself. Interviewer: fill out the information below prior to beginning the interview.

**Step 3:** Conduct the interview. Please remember to audio record the interview.

Interview place: \_\_\_\_\_

Interview date: \_\_\_\_\_

Start time: \_\_\_\_\_

End time: \_\_\_\_\_

Interviewer name: \_\_\_\_\_

Interview identification: \_\_\_\_\_

### Participant information

Duration of current pregnancy (weeks/months, please label): \_\_\_\_\_

Age (years): \_\_\_\_\_

Marital status (Single, married/cohabitating, divorced, widowed): \_\_\_\_\_

Occupation (write in): \_\_\_\_\_

1  
2  
3 Part 1. Values and needs surrounding the childbirth period

- 4 1. What are some things you are doing to prepare for your birth?  
5 a. Probe: who is helping you to prepare? How are they helping?  
6  
7  
8 2. Thinking about your pregnancy, what are some of the things you value most? Why?  
9 a. Probe: to keep yourself healthy?  
10 b. Probe: to keep your baby healthy?  
11  
12 3. Thinking to the future about your birth, what are some of the things that are most important  
13 to you?  
14 a. Probe: What will you need from your doctors and midwives to make sure this  
15 happens?  
16 b. Probe: what will you need from your family to make sure this happens?  
17 c. Where are you planning to give birth? Why?  
18 i. Did anyone help you decide where to give birth? Who? How did they help?  
19  
20  
21

22 Part 2. Prenatal education

- 23 4. Thinking about when you go to your antenatal care visits, what are some of the things that  
24 are most important to you to learn about?  
25 a. Probe: What are some of the most important things you have learned during  
26 antenatal care? Why are they important?  
27 b. Probe: How do you think antenatal care could be improved?  
28 i. What do you think is missing from your antenatal care visits?  
29 ii. Are there any things that you would remove or change during your antenatal  
30 care visits?  
31  
32

33 Part 3. Preferences and decision-making processes regarding mode of childbirth

- 34 5. Could you tell me about the different ways that women can give birth?  
35 a. Probe: How did you learn about these options?  
36  
37 6. What do you think about vaginal birth and caesarean section?  
38  
39 7. What do you think are some of the positive things about vaginal birth?  
40 a. Probe: Why are these positive things?  
41 b. Probe: How did you learn about these positive things?  
42  
43 8. What are some of the negative things about vaginal birth?  
44 a. Probe: Why are these negative things?  
45 b. Probe: How did you learn about these negative things?  
46  
47 9. What do you think are some of the positive things about caesarean section?  
48 a. Probe: Why are these positive things?  
49 b. Probe: How did you learn about these positive things?  
50  
51 10. What are some of the negative things about caesarean section?  
52 a. Probe: Why are these negative things?  
53 b. Probe: How did you learn about these negative things?  
54  
55 11. How did you learn about vaginal birth and caesarean section?  
56  
57  
58  
59  
60

- 1  
2  
3  
4  
5  
6  
7  
8  
9  
10  
11  
12  
13  
14  
15  
16  
17  
18  
19  
20  
21  
22  
23  
24  
25  
26  
27  
28  
29  
30  
31  
32  
33  
34  
35  
36  
37  
38  
39  
40  
41  
42  
43  
44  
45  
46  
47  
48  
49  
50  
51  
52  
53  
54  
55  
56  
57  
58  
59  
60
12. How would you prefer to give birth? For example, caesarean or vaginal birth?
- Why do you prefer to give birth this way?
  - How important is it for you to give birth this way? Why?
  - Was anyone involved in helping you make a decision about how you prefer to give birth?
    - Probe: Will your (husband/partner) influence this decision? How?
    - Probe: Will your family influence this decision? How?
    - Probe: Will your friends influence this decision? How?
    - Probe: Will your doctor or midwife influence this decision? How?
    - Probe: Will the media influence this decision? How?
13. Do you feel like you have enough information to understand the options that you have for how to give birth? Why or why not?
- Probe: What other type of information about different modes of childbirth would you be interested to learn about?
  - At what point during your pregnancy would you like to receive this information?
14. Did you discuss your preference with your doctor or midwife? If so, what was the discussion like?
15. *A decision-analysis tool could help to educate women about their options for mode of birth and how to discuss their preferences with a doctor. Interviewer: show the woman the Vietnam decision analysis tool.*
- Would this type of tool be helpful to you? Why or why not?
  - What type of information would you like to have included?
  - This type of decision tool can be paper based like this example, or could be an application for a phone. Which of these options do you prefer and why?*
16. Pregnancy and childbirth are exciting times but can also be scary for some women. Is there anything that you are afraid or nervous of during your pregnancy? Why or why not?
- Note to interviewer: if they bring up fear of pain, then probe about what pain management technique they have learned about.*
- What about during your birth, is there anything that you are afraid of? Why or why not?
    - Have you spoken to your doctor or midwife about these fears? Why or why not? What did they tell you?
    - Have you spoken to anyone else about these fears?
      - If yes:*
        - Who did you speak to? Why did you choose to speak to this person?
        - What type of advice did they give you?
      - If no:* Do you plan to speak to anyone about these fears? Why or why not?
    - What do you think could be done to help reduce this fear for you?

#### Part 4. Labour companionship

17. What do you need in order to have a positive experience when you go to the hospital for childbirth?
- What type of support do you think you need during labour and childbirth?

1  
2  
3 *Interviewer read: A labour companion is a person of the woman's choice, who can help to provide*  
4 *emotional support to the woman during labour and childbirth. Typically, this person would be with*  
5 *the woman continuously throughout labour and childbirth. This person may be the woman's*  
6 *husband/partner, her mother, or a friend.*  
7

8 18. Do you think you will receive this type of support? Why or why not?  
9

10 19. Have you ever heard of someone providing this type of support?  
11

12 20. What do you think of this type of support?  
13

14 21. Do you know if labour companionship is allowed in the hospital you plan to give birth in?

15 e. *If labour companionship is not allowed:* What do you think are the reasons for  
16 not allowing a labour companion?  
17

18 f. Would you be allowed a labour companion if you requested it? Why or why not?  
19

20 g. In your opinion, what changes do you think the hospital could make in order to  
21 make it more comfortable for women to have a labour companion?  
22

23 22. Do you think you would want to have a labour companion for your upcoming birth? Why  
24 or why not?

25 h. What type of information or education would YOU need before deciding if you  
26 wanted to have a labour companion to support you?  
27

28 23. If you were to have a labour companion with you:

29 i. What would you expect from this person?  
30

31 j. When would you want this person to be with you in the hospital (probe: the  
32 whole time, only during labour but not during the birth, something else?)  
33

34 k. Who would you prefer this person to be? Why?  
35

36 l. When would you like to start talking to your labour companion about their role  
37 during your labour and childbirth?  
38

39 iii. Probe: at what month during your pregnancy?  
40

41 24. What type of information or education do you think a labour companion would need to  
42 be able to support you?  
43

44 *Thank you so much for your time. Is there anything else that you would like to share with me today*  
45 *about anything we talked about?*  
46  
47  
48  
49  
50  
51  
52  
53  
54  
55  
56  
57  
58  
59  
60

## In-depth interview: postpartum women

**Step 1:** Introduce yourself to the participant. Describe the purpose of the interview and how information will be used. Obtain oral/written consent.

**Step 2:** Ask the participant to identify herself. Interviewer: fill out the information below prior to beginning the interview.

**Step 3:** Conduct the interview. Please remember to audio record the interview.

Interview place: \_\_\_\_\_

Interview date: \_\_\_\_\_

Start time: \_\_\_\_\_

End time: \_\_\_\_\_

Interviewer name: \_\_\_\_\_

Interview identification: \_\_\_\_\_

### Participant information

Duration of current pregnancy (weeks/months, please label): \_\_\_\_\_

Age (years): \_\_\_\_\_

Marital status (Single, married/cohabitating, divorced, widowed): \_\_\_\_\_

Occupation (write in): \_\_\_\_\_

1  
2  
3  
4  
5 **Part 1. Values and needs surrounding the childbirth period**

6 25. Can you tell me about your recent birth?

- 7 a. Where did you give birth?  
8 b. Were you planning to give birth there? Why or why not?  
9 c. How did you make the decision about where to give birth?  
10 i. Who was involved in the decision about where to give birth?  
11 ii. Probe: Did you influence this decision? How?  
12 iii. Probe: Did your family or her family influence this decision? How?  
13 iv. Probe: Did your friends or her friends influence this decision? How?  
14 v. Probe: Did the doctor or midwife influence this decision? How?  
15 vi. Probe: Did the media influence this decision? How?

16  
17  
18 26. How did you feel about your overall experience of giving birth?

- 19 a. How would you describe your birth experience? Why?

20  
21  
22 27. Satisfaction

- 23 a. How satisfied are you with the type of care you received during labour and  
24 childbirth?  
25 b. Can you give me an example of something you are very satisfied with?  
26 c. Can you give me an example of something you are NOT satisfied with?

27  
28 28. How well do you feel that your healthcare provider respected your opinions about care  
29 during labour and childbirth?

- 30 a. Can you give me an example of a time when your healthcare provider respected  
31 your opinions about your care during labour and childbirth?  
32 i. How did this make you feel?  
33 b. Can you give me an example of a time when your healthcare provider did NOT  
34 respect your opinions about your care during labour and childbirth?  
35 i. Probe: Or, an example of a time during labour and childbirth when someone  
36 else was making decision without talking with you?  
37 1. How did this make you feel?  
38  
39  
40

41 **Part 2. Decision-making processes regarding mode of childbirth**

42 29. Could you tell me about the different ways that women can give birth?

- 43 a. Probe: How did you learn about these options?

44  
45 30. What about for your most recent birth – how did you give birth? For example, caesarean or  
46 vaginal birth?

- 47 a. Is this the way that you preferred to give birth? Why or why not?  
48 b. Probe: How did you come to give birth in this way?  
49 i. Probe: Did your (husband/partner) influence this decision? How?  
50 ii. Probe: Did your family influence this decision? How?  
51 iii. Probe: Did your friends influence this decision? How?  
52 iv. Probe: Did your doctor or midwife influence this decision? How?  
53 1. Did you discuss this decision with your doctor or midwife? If so,  
54 what was the discussion like?  
55 v. Probe: Did the media influence this decision? How?  
56  
57  
58

59 31. What do you think about vaginal birth and caesarean section?

- 60 a. What do you think are some of the positive things about vaginal birth?

- 1  
2  
3 i. Probe: Why are these positive things?  
4 ii. Probe: How did you learn about these positive things?  
5 b. What are some of the negative things about vaginal birth?  
6 i. Probe: Why are these positive things?  
7 ii. Probe: How did you learn about these positive things?  
8 c. What do you think are some of the positive things about caesarean section?  
9 i. Probe: Why are these positive things?  
10 ii. Probe: How did you learn about these positive things?  
11 d. What are some of the negative things about caesarean section?  
12 i. Probe: Why are these positive things?  
13 ii. Probe: How did you learn about these positive things?  
14  
15

16  
17 32. How did you learn about vaginal birth and caesarean section?

18  
19 33. Did you feel like you had enough information to understand the options that you had for  
20 how to give birth? Why or why not?

- 21 a. Probe: What other type of information about different modes of childbirth would  
22 you have been interested to learn about?  
23 b. At what point during your pregnancy would you like to receive this information?  
24

### 25 Part 3. Prenatal education

26  
27 34. Thinking back to your antenatal care visits, what were some of the things that were most  
28 important to you to learn about?

- 29 a. Probe: What are some of the most important things you have learned during  
30 antenatal care? Why are they important?  
31 b. Probe: How do you think antenatal care could be improved?  
32 i. What do you think was missing from your antenatal care visits?  
33 ii. Are there any things that you would remove or change during your  
34 antenatal care visits?  
35  
36  
37

### 38 Part 4. Decision-aids

39  
40 35. Where did you get most of the information to educate you about what to expect while  
41 giving birth?

- 42 a. What type of topics did you learn about?  
43 b. How well do you feel these educational materials prepared you to give birth? Why?  
44 i. Probe: can you give me an example of something that you felt very well  
45 prepared for?  
46 ii. Probe: can you give me an example of something that you did NOT feel well  
47 prepared for?  
48 c. Overall, how well prepared did you feel to give birth? Why?  
49  
50  
51  
52  
53  
54  
55  
56  
57  
58  
59  
60

- 1  
2  
3 36. Did you feel like you had sufficient time to talk to your doctor or midwife about any  
4 concerns that you had about labour and childbirth? Why or why not?  
5 a. Can you give me an example of a time when you felt that you were able to discuss  
6 your questions or concerns with your doctor or midwife?  
7 b. Can you give me an example of a time when you felt that you were NOT able to  
8 discuss your questions or concerns with your doctor or midwife?  
9  
10  
11 37. *A decision-analysis tool could help to educate women about their options for mode of birth*  
12 *and how to discuss their preferences with a doctor. Interviewer: show the woman the*  
13 *Vietnam decision analysis tool.*  
14 a. Would this type of tool be helpful to you? Why or why not?  
15 b. What type of information would you like to have included?  
16 c. This type of decision tool can be paper based like this example, or could be an  
17 application for a phone. Which of these options do you prefer and why?  
18  
19

## 20 Part 5. Labour companionship

- 21 38. Who was with you while you were in labour?  
22 a. Probe: was your husband/partner with you?  
23 i. If yes:  
24 1. What was he doing while you were in labour and giving birth?  
25 2. Was he in the room with you? Why or why not?  
26  
27 b. Probe: were any of your family members or friends with you?  
28 i. If yes:  
29 1. Who was with you?  
30 2. What were they doing while you were in labour and giving birth?  
31 3. Were they in the room with you? Why or why not?  
32  
33  
34 39. What type of support do you think that you need during labour and childbirth while in the  
35 facility?  
36 a. Did you feel that you were supported during labour and childbirth? Why or why not?  
37 b. Can you give me an example of when you did feel supported?  
38 c. Can you give me an example of when you did not feel supported?  
39 d. What could have been done to improve your experience of support during labour  
40 and childbirth?  
41 i. Probe: Why do you think this is important?  
42  
43  
44

45 *Interviewer to read: Some women have a person with them during labour and childbirth, and we call*  
46 *this person a "labour companion". A labour companion is typically a woman's husband, boyfriend,*  
47 *sister, mother, or friend, who stays with the woman throughout labour and childbirth. They help the*  
48 *woman by providing emotional support, praising her and reassuring her.*

- 49 40. What do you think about this type of support?  
50  
51  
52 41. Would you have wanted someone to support you in this way during your labour and  
53 childbirth? Why or why not?  
54  
55  
56  
57  
58  
59  
60



- 1  
2  
3  
4  
5  
6  
7  
8  
9  
10  
11  
12  
13  
14  
15  
16  
17  
18  
19  
20  
21  
22  
23  
24  
25  
26  
27  
28  
29  
30  
31  
32  
33  
34  
35  
36  
37  
38  
39  
40  
41  
42  
43  
44  
45  
46  
47  
48  
49  
50  
51  
52  
53  
54  
55  
56  
57  
58  
59  
60
42. Who would you want this person to be?
- Probe: your husband/partner? Why?
  - Probe: a sister or friend? Why?
  - Probe: a mother or mother-in-law? Why?
43. When would you want to have this person with you?
- Probe: all of the time during labour and childbirth?
  - Probe: only some of the time (e.g. only during labour, but not the birth)
44. How do you think having a labour companion might be helpful?
45. What are some challenges to having a labour companion?
46. Do you know if labour companionship is allowed in the hospital you gave birth in?
- If labour companionship is not allowed:* What do you think are the reasons for not allowing a labour companion in this hospital?
47. What changes do you think the hospital could make to make it more comfortable for women to have a labour companion?
48. Do you have any other comments or feedback about labour companionship?

*Thank you so much for your time. Is there anything else that you would like to share with me today about anything we talked about?*

### In-depth interview: partner / potential companion (before birth)

**Step 1:** Introduce yourself to the participant. Describe the purpose of the interview and how information will be used. Obtain oral/written consent.

**Step 2:** Ask the participant to identify herself. Interviewer: fill out the information below prior to beginning the interview.

**Step 3:** Conduct the interview. Please remember to audio record the interview.

Interview place: \_\_\_\_\_

Interview date: \_\_\_\_\_

Start time: \_\_\_\_\_

End time: \_\_\_\_\_

Interviewer name: \_\_\_\_\_

Interview identification: \_\_\_\_\_

#### Participant information

Relationship with pregnant woman: \_\_\_\_\_

Age (years): \_\_\_\_\_

Marital status (Single, married/cohabitating, divorced, widowed): \_\_\_\_\_

Occupation (write in): \_\_\_\_\_

#### Information on pregnant women

N° of women's interview: \_\_\_\_\_

Duration of current pregnancy: \_\_\_\_\_

1  
2  
3  
4  
5  
6  
7  
8  
9  
10  
11  
12  
13  
14  
15  
16  
17  
18  
19  
20  
21  
22  
23  
24  
25  
26  
27  
28  
29  
30  
31  
32  
33  
34  
35  
36  
37  
38  
39  
40  
41  
42  
43  
44  
45  
46  
47  
48  
49  
50  
51  
52  
53  
54  
55  
56  
57  
58  
59  
60

## Part 1. Values and needs surrounding the childbirth period

49. What are some things you are doing to prepare for your (wife/partner/daughter/sister...) birth?
- Probe: who is helping you to prepare? How are they helping?
50. Thinking about your wife/partner/sister pregnancy, what are some of the things you value most? Why?
- Probe: to keep her healthy?
  - Probe: to keep the baby healthy?
  - Probe: for yourself personally?
51. Thinking to the future about your (wife/partner/daughter/sister...) birth, what are some of the things that are most important to you?
- Probe: What will you need from your doctors and midwives to make sure this happens?
  - Probe: what will you need from your family to make sure this happens?
52. Place of birth
- Where is your (wife/partner/daughter/sister...) planning to give birth? Why?
  - How did she make the decision about where to give birth?
    - Did anyone help her make the decision about where to give birth? Who? How?

## Part 2. Decision-making processes regarding mode of childbirth

53. Could you tell me about the different ways that women can give birth?
- Probe: How did you learn about these options?
54. What do you think about vaginal birth and caesarean section?
- What do you think are some of the positive things about vaginal birth?
  - What are some of the negative things about vaginal birth?
  - What do you think are some of the positive things about caesarean section?
  - What are some of the negative things about caesarean section?
55. How would you prefer that your (wife/partner/daughter/sister...) gives birth? For example, caesarean or vaginal birth?
- Probe: Why do you prefer this way?
  - Does your (wife/partner/daughter/sister...) also prefer to give birth this way? Why or why not?
56. Did your (wife/partner/daughter/sister...) decide about how she will give birth? For example, caesarean or vaginal birth?
- Probe: Who makes this decision?  
(note: the decision about mode of birth has not yet been made, or if he/she responds that they don't know to question 7, please instead ask: "How do you think she would plan to make this decision?")
    - Probe: Did you influence this decision? How?
    - Probe: Did your family or her family influence this decision? How?
    - Probe: Did your friends or her friends influence this decision? How?
    - Probe: Did the doctor or midwife influence this decision? How?
    - Probe: Did the media influence this decision? How?

### Part 3. Prenatal education

57. Have you been to any antenatal care visits with your (wife/partner/daughter/sister...)? Why or why not?

- a. *If yes:* Thinking about when you went to the antenatal care visits, what are some of the things that are most important to you?
  - vi. Probe: What are some of the most important things you have learned during antenatal care? Why are they important?
  - vii. Probe: How do you think antenatal care could be improved?
  - viii. What do you think is missing from the antenatal care visits?
  - ix. Are there any things that you would remove or change during the antenatal care visits? What are they and why would you change?

58. Thinking about antenatal care visits, what are some of the things that are most important to you to learn about?

- a. Probe: What are some of the most important things you have learned during antenatal care? Why are they important?
- b. Probe: How do you think antenatal care could be improved?

### Part 4. Decision-aids

59. How did you learn about vaginal birth and caesarean section?

60. Do you feel like you have enough information to understand the options that women have for how to give birth? Why or why not?

- i. Probe: What other type of information about different modes of childbirth would you be interested to learn about?
- ii. At what point during your (wife/partner/sister...)'s pregnancy would you like to receive this information?

61. Pregnancy and childbirth are exciting times but can also be scary. Is there anything that you are afraid of or nervous about pregnancy or childbirth? Why or why not?

- a. What about during the birth, is there anything that you are afraid of? Why or why not?
- b. *If yes:*
  - i. Have you spoken to anyone about these fears? Why or why not?
    1. *If yes:* What did they tell you?
    2. *If no:* Do you plan to speak to anyone about these fears? Why or why not?
  - ii. What do you think could be done to help reduce this fear for you?

### Part 5. Labour companionship

62. Do you plan to go to the hospital with your (wife/partner/daughter/sister...) when she gives birth? Why or why not?

63. If you do go to the hospital when your (wife/partner/ daughter/sister...) gives birth, what do you need in order to have a positive experience?

64. What type of support do you think your (wife/partner/ daughter/sister...) needs during labour and childbirth?

- a. Do you think she will receive this type of support? Why or why not?

1  
2  
3  
4 Interviewer read: *A labour companion is a person of the woman's choice, who can help to provide*  
5 *emotional support to the woman during labour and childbirth. Typically, this person would be with*  
6 *the woman continuously throughout labour and childbirth. This person may be the woman's*  
7 *husband/partner, her mother, or a friend.*

- 8  
9 65. Have you ever heard of someone providing this type of support?  
10  
11 66. What do you think of this type of support?  
12  
13 67. Do you know if labour companionship is allowed in the hospital your (wife/partner/  
14 daughter/sister...) plan to give birth in?  
15 a. *If labour companionship is not allowed:* What do you think are the reasons for not  
16 allowing a labour companion?  
17 b. Would your (wife/partner/sister...) be allowed a labour companion if she requested  
18 it? Why or why not?  
19  
20 68. Have you ever provided this type of support before? (If yes: Could you tell me more about  
21 this?)  
22  
23 69. Do you think your (wife/partner/ daughter/sister...) would want to have a labour companion  
24 for her upcoming birth? Why or why not?  
25  
26 70. If your (wife/partner/ daughter/sister...) were to have a labour companion with her, who do  
27 you think she would prefer this person to be? Why?  
28  
29 71. If your (wife/partner/ daughter/sister...) were to have a labour companion with her, what do  
30 you think she would expect from this person?  
31  
32 72. Would you be interested in being a labour companion to your (wife/partner/  
33 daughter/sister...)? Why or why not?  
34  
35 73. What would you need in order to be a good labor companion?  
36 a. What do you need from the woman?  
37 b. What do you need from the nurses and doctors?  
38 c. What do you need from the hospital?  
39  
40 74. What type of information or education do you think a labour companion would need to be  
41 able to support her?  
42 a. When during pregnancy do you think a woman or a nurse should start talking to a  
43 potential labour companion about their role during labour and childbirth?  
44  
45 75. In your opinion, what changes do you think the hospital could make in order to make it more  
46 comfortable for women to have a labour companion?  
47  
48  
49  
50  
51

52 *Thank you so much for your time. Is there anything else that you would like to share with me today*  
53 *about anything we talked about?*  
54  
55  
56  
57  
58  
59  
60

## In-depth interview: partner / potential companion (postpartum)

**Step 1:** Introduce yourself to the participant. Describe the purpose of the interview and how information will be used. Obtain oral/written consent.

**Step 2:** Ask the participant to identify herself. Interviewer: fill out the information below prior to beginning the interview.

**Step 2:** Conduct the interview. Please remember to audio record the interview.

Interview place: \_\_\_\_\_

Interview date: \_\_\_\_\_

Start time: \_\_\_\_\_

End time: \_\_\_\_\_

Interviewer name: \_\_\_\_\_

Interview identification: \_\_\_\_\_

### Participant information

Relationship with pregnant woman: \_\_\_\_\_

Age (years): \_\_\_\_\_

Marital status (Single, married/cohabitating, divorced, widowed): \_\_\_\_\_

Occupation (write in): \_\_\_\_\_

### Information on pregnant women

N° of women's interview: \_\_\_\_\_

Woman's date of most recent birth: \_\_\_\_\_

1  
2  
3 **Part 1. Values and needs surrounding the childbirth period**

4 *Note to interviewers: only ask questions 1-3 at Khon Kaen University Hospital or any hospital that*  
5 *allows companions.*  
6

7 **76. How did you feel about your overall experience of your (wife/partner/daughter/sister...)**  
8 **giving birth?**

9 a. How would you describe your experience? Why?  
10

11 **77. Satisfaction**

12 a. How satisfied are you with the type of care your (wife/partner/daughter/sister...)  
13 received by your (wife/partner/daughter/sister...) during labour and childbirth?  
14

15 b. Can you give me an example of something you are very satisfied with?  
16

17 c. Can you give me an example of something you are NOT satisfied with?  
18

19 **78. How well do you feel that your (wife/partner/daughter/sister...) healthcare provider**  
20 **respected your opinions about care during labour and childbirth?**

21 a. Can you give me an example of a time when your (wife/partner/daughter/sister...)  
22 healthcare provider respected your opinions about care during labour and  
23 childbirth?  
24

25 b. Can you give me an example of a time when your (wife/partner/daughter/sister...)  
26 healthcare provider did NOT respect your opinions about your care during labour  
27 and childbirth?  
28

29 i. Probe: Or, an example of a time during labour and childbirth when someone  
30 else was making decision without talking with you or your  
31 (wife/partner/daughter/sister...)?  
32

33 **79. Place of birth**

34 a. Was she planning that she would give birth in this facility? Why or why not?  
35

36 b. How was the decision made about where she gave birth?  
37

38 i. Who was involved in the decision-making?  
39

40 **80. Thinking back to your wife/partner/sister birth, what are some of the things you value most?**  
41 **Why?**

42 a. Probe: to keep her healthy?  
43

44 b. Probe: to keep the baby healthy?  
45

46 c. Probe: for yourself personally?  
47

48 **Part 2. Decision-making processes regarding mode of childbirth**

49 **81. Could you tell me about the different ways that women can give birth?**

50 a. Probe: How did you learn about these options?  
51

52 **82. What about for your (wife/partner/daughter/sister...) most recent birth – how did she give**  
53 **birth? For example, caesarean or vaginal birth?**

54 a. Is this the way that you preferred your (wife/partner/daughter/sister...) would give  
55 birth? Why or why not?  
56

57 b. Probe: How did you decide that you preferred her to give birth in this way?  
58

59 i. Probe: Did your (wife/partner/daughter/sister...) influence your opinion?  
60 How?  
61

62 ii. Probe: Did your family influence your opinion? How?  
63

64 iii. Probe: Did your friends influence your opinion? How?  
65

- 1  
2  
3 iv. Probe: Did your (wife/partner/daughter/sister...) doctor or midwife influence  
4 your opinion? How?  
5 v. Probe: Did the media influence your opinion? How?  
6  
7  
8 c. Did you discuss your opinion with your (wife/partner/daughter/sister...) doctor or  
9 midwife? If so, what was the discussion like?  
10
- 11 83. Who decided about how she would give birth?  
12 a. Probe: who was involved in the decision-making?  
13 b. Probe: Did you influence this decision? How?  
14 c. Probe: Did your family or her family influence this decision? How?  
15 d. Probe: Did your friends or her friends influence this decision? How?  
16 e. Probe: Did the doctor or midwife influence this decision? How?  
17 f. Probe: Did the media influence this decision? How?  
18  
19
- 20 84. How did you learn about vaginal birth and caesarean section?  
21  
22
- 23 85. Did you feel like you had enough information to understand the options that your  
24 (wife/partner/daughter/sister) had for how to give birth? Why or why not?  
25
- 26 86. Did you feel like you had sufficient time to talk to your (wife/partner/daughter/sister...)  
27 doctor or midwife about any concerns that you had about your  
28 (wife/partner/daughter/sister...) labour and childbirth? Why or why not?  
29 a. Can you give me an example of a time when you felt that you were able to discuss  
30 your questions or concerns with your (wife/partner/daughter/sister...) doctor or  
31 midwife?  
32 b. Can you give me an example of a time when you felt that you were NOT able to  
33 discuss your questions or concerns with your (wife/partner/daughter/sister...)  
34 doctor or midwife?  
35  
36
- 37 87. Pregnancy and childbirth are exciting times but can also be scary. Is there anything that you  
38 were afraid of or nervous about the childbirth?  
39
- 40 88. *A decision-analysis tool could help to educate women about their options for mode of birth*  
41 *and how to discuss their preferences with a doctor. Interviewer: show the woman the*  
42 *Vietnam decision analysis tool.*  
43 a. Would this type of tool be helpful to you? Why or why not?  
44 b. What type of information would you like to have included?  
45 c. This type of decision tool can be paper based like this example, or could be an  
46 application for a phone. Which of these options do you prefer and why?  
47  
48

### 49 Part 3. Labour companionship

- 50 89. Were you at the hospital with your (wife/partner/daughter/sister...) when she gave birth?  
51 Why or why not?  
52  
53
- 54 90. If you have gone to the hospital when your (wife/partner/ daughter/sister...) gave birth,  
55 what did you need in order to have a positive experience?  
56  
57
- 58 91. What type of support do you think your (wife/partner/ daughter/sister...) needed during  
59 labour and childbirth?  
60 a. Do you think she will received this type of support? Why or why not?



1  
2  
3  
4  
5  
6 Interviewer read: A labour companion is a person of the woman's choice, who can help to provide  
7 emotional support to the woman during labour and childbirth. Typically, this person would be with  
8 the woman continuously throughout labour and childbirth. This person may be the woman's  
9 husband/partner, her mother, or a friend.

- 10 92. Have you ever heard of someone providing this type of support?
- 11
- 12
- 13 93. What do you think of this type of support?
- 14
- 15 94. Do you know if labour companionship was allowed in the hospital your (wife/partner/  
16 daughter/sister...) gave birth in?
- 17 a. *If labour companionship was not allowed:* What do you think are the reasons for not  
18 allowing a labour companion?
- 19 b. Had your (wife/partner/sister...) be allowed a labour companion if she had  
20 requested it? Why or why not?
- 21
- 22
- 23 95. Have you ever provided this type of support before?
- 24 a. *If yes:* Could you tell me more about this?
- 25
- 26 96. Do you think your (wife/partner/ daughter/sister...) would have wanted to have a labour  
27 companion for her birth? Why or why not?
- 28
- 29
- 30 97. If your (wife/partner/ daughter/sister...) were to have a labour companion with her, who do  
31 you think she would prefer this person to be? Why?
- 32
- 33 98. If your (wife/partner/ daughter/sister...) were to have a labour companion with her, what do  
34 you think she would expect from this person?
- 35
- 36
- 37 99. Would you be interested in being a labour companion to your (wife/partner/  
38 daughter/sister...)? Why or why not?
- 39
- 40 100. What would you need in order to be a good labor companion?
- 41 a. What do you need from the woman?
- 42 b. What do you need from the nurses and doctors?
- 43 c. What do you need from the hospital?
- 44
- 45 101. What type of information or education do you think a labour companion would need  
46 to be able to support her?
- 47 a. When do you think a woman should start talking to a potential labour companion  
48 about their role during labour and childbirth? (probe: at what month during the  
49 pregnancy?)
- 50
- 51
- 52 102. In your opinion, what changes do you think the hospital could make in order to  
53 make it more comfortable for women to have a labour companion?
- 54
- 55

56 *Thank you so much for your time. Is there anything else that you would like to share with me today*  
57 *about anything we talked about?*

58

59

60

## In-depth interview: providers

**Step 1:** Introduce yourself to the participant. Describe the purpose of the interview and how information will be used. Obtain oral/written consent.

**Step 2:** Complete sociodemographic information about the participant.

**Step 3:** Conduct the interview. Please remember to audio record the interview.

Interview place: \_\_\_\_\_

Interview date: \_\_\_\_\_

Start time: \_\_\_\_\_

End time: \_\_\_\_\_

Interviewer name: \_\_\_\_\_

Interview identification: \_\_\_\_\_

Participant information

Name of health facility currently employed at (write in): \_\_\_\_\_

Cadre and position (write in): \_\_\_\_\_

Number of years working at current health facility: \_\_\_\_\_

Number of years as a (doctor/midwife/nurse) in total: \_\_\_\_\_

Age (years): \_\_\_\_\_

Marital status (Single, married/cohabitating, divorced, widowed): \_\_\_\_\_

## Decision-making processes regarding mode of childbirth

1. Could you describe what you think quality care provided during childbirth is?
  - a. Could you give me an example of a situation when this kind of care was provided by you?
    - i. Why do you think you were able to provide quality care in this situation?
    - ii. How did your colleagues support you to provide quality care?
  - b. Could you give me an example of a situation when this kind of care was NOT provided by you or by a coworker?
    - i. Why do you think you weren't able to provide quality care in this situation?
    - ii. Did you feel like your colleagues supported you in this situation? Why or why not?
2. In your health facility, how are decisions made about whether a woman will give birth vaginally or by caesarean section?
  - i. Who is involved in making the decision, and what roles do they play?
  - ii. In your health facility, what are some of the clinical indications for caesarean section?
  - iii. Other than clinical indications for caesarean section, what factors might influence if a woman has a caesarean section?
3. Is assisted vaginal delivery (e.g. by vacuum or forceps) used in your facility?
  - i. Probe: why or why not?
  - ii. Probe: were you trained on how to provide assisted vaginal delivery? Please explain.
4. In your facility, do you think that women prefer to give birth by caesarean section or vaginally? Please explain.
5. In your health facility, how do you manage women who request to have an elective caesarean section?
  - i. Why do you think women may request to have a caesarean section without a medical indication (e.g. elective caesarean)?
  - ii. Who do you think influences women's decisions to have a caesarean section without a medical indication (e.g. elective caesarean)?
6. As a clinician, do you prefer for women to give birth vaginally or by caesarean section? Why?
  - i. What are some of the benefits/challenges of caesarean section/vaginal birth?
  - ii. Which do you think is safer: vaginal birth or caesarean section? Why?
7. In your opinion, are high rates of caesarean section a problem in your health facility? Why or why not?
  - i. *Probe if yes:*
    - i. Why do you think there are high rates of caesarean section in your facility?
    - ii. Do you think that the caesarean section rate in your facility can be reduced? Why or why not?
    - iii. Do you think that the caesarean section rate in your facility should be reduced? Why or why not?
    - iv. What are the barriers to reducing high rates of caesarean section in your facility?

- 1  
2  
3 v. What could be done to reduce high rates of caesarean section in your  
4 facility?  
5  
6 ii. *Probe if no:*  
7 i. Do you think that the caesarean section rate in your facility could be  
8 reduced? Why or why not?  
9 ii. Do you think that the caesarean section rate in your facility should be  
10 reduced? Why or why not?  
11 iii. What are the barriers to reducing high rates of caesarean section in your  
12 facility?  
13  
14 8. From your perspective, is a caesarean section more or less work for a healthcare provider,  
15 compared to a vaginal birth? Please explain.  
16  
17 9. In your opinion, do you think it is financially more profitable for providers or health facilities  
18 to conduct a caesarean section, compared to a vaginal birth?  
19 a. *Probe:* Why or why not?  
20  
21  
22

### Prenatal education and decision-analysis tool

23  
24 *Interviewer: The next section of this interview is about the type of health education about mode of*  
25 *birth that you think women would like to receive during antenatal care. I would like to ask you some*  
26 *questions about what you think about different topics of health education to be discussed during*  
27 *antenatal care.*  
28

- 29 10. In your opinion, do you think that women have sufficient knowledge about their options and  
30 the risks and benefits for different mode of birth? Why or why not?  
31  
32 11. In your practice, how do pregnant women they access information about their options for  
33 mode of birth?  
34 a. What do you think about these information resources?  
35  
36 12. What type of information do you think that women need to inform their preferences and  
37 decisions about their mode of birth?  
38 a. *Probe:* Risks of different methods, benefits of different methods, personal  
39 preferences  
40  
41 13. Do you think that groups of women may have different needs for information about mode of  
42 birth?  
43 a. *Probe if yes:* what groups of women do you think may need different information?  
44 b. *Probe if yes:* What type of information do you think that these women might need?  
45  
46 14. During antenatal care, do you (or providers conducting antenatal care in your facility) discuss  
47 with women whether they have a preference for vaginal birth or caesarean section?  
48 a. *IF YES, probe:* What do you discuss with the women?  
49 b. *IF NO, probe:* Do you think that discussing their preferences for vaginal birth or  
50 caesarean section could be helpful? Why or why not?  
51  
52 15. What information do you think could be included in prenatal education about vaginal birth  
53 and caesarean section?  
54  
55 16. At what point during a woman's pregnancy do you think they should receive this information  
56 about mode of birth? Why?  
57  
58  
59  
60

1  
2  
3 17. How often do you think women should receive this information about vaginal birth and  
4 caesarean section?

5 a. *Probe:* Once? More than once?

6  
7  
8 18. How would do you think women should receive this information?

9 a. *Probe:* Should she receive this information verbally, from her healthcare provider?  
10 Why or why not?

11 b. *Probe:* Should she receive this information in a pamphlet or brochure? Why or why  
12 not?

13 c. *Probe:* Should she receive this information using a computer or a mobile phone  
14 application? Why or why not?  
15

16 *(Interviewer: use the Vietnam decision-analysis tool as an example)*

17 *The next section of this interview is about using decision-tools (such as a computer, tablet or a smart*  
18 *phone) to help pregnant women with previous caesarean sections to understand their choices about*  
19 *mode of birth. By this, we mean whether the woman will have planned vaginal birth, trial of labour,*  
20 *or a caesarean section. These decision-tools would provide them with information about potential*  
21 *benefits and harms of the different options. They would be in addition to any regular counselling or*  
22 *discussions with healthcare providers. I would like to ask you some questions about what you think*  
23 *about these decision-tools.*

24  
25 19. *A decision-tool could provide descriptions of the health outcomes associated with planned*  
26 *vaginal birth, planned caesarean section, and emergency caesarean section. They can also*  
27 *ask questions about a woman's values and preferences for possible outcomes. Once this*  
28 *information is provided, the decision-tool can produce a recommended "preferred option",*  
29 *based on a woman's preferences. The woman could then bring this to her healthcare*  
30 *provider to discuss in more detail. What do you think about this type of decision-tool?*

31 Does this description of a decision-tool sound like something that might be useful to you? Why  
32 or why not?

33 a. What do you think are some of the benefits of using a decision-tool to help decide  
34 about how a woman will give birth?

35 i. *Probe:* to you as a provider?

36 ii. *Probe:* to the woman

37 b. What do you think are some of the challenges of using a decision-tool to help decide  
38 about how a woman will give birth?

39 iii. *Probe:* to you as a provider?

40 iv. *Probe:* to the woman

41 c. At what point during a woman's pregnancy would it be most helpful for her to have  
42 access to this type of decision-tool? Why?

43 d. How might you use the results of the decision tool, or the woman's "preferred  
44 option", to discuss her options for mode of birth?

45 e. Do you think that you would recommend that women use this type of decision-tool?  
46 Why or why not?  
47

48  
49  
50  
51 20. These types of decision-tools can come in different formats. For example, on paper, a  
52 computer, a tablet, or a smart phone application. What format do you think would be most  
53 helpful? Why?  
54

## 55 Audit and feedback

56 *Note to interviewer: use graphic of audit and feedback/Robson classification to explain to providers*  
57 *who don't understand. Consider using an example of maternal morbidity and mortality conference as*  
58 *example of audit and feedback.*  
59  
60

1  
2  
3  
4 *Interviewer: The next part of the study is about **using audit and feedback as a tool for quality***  
5 ***improvement**. The purpose of audit and feedback is to encourage individuals and teams to follow*  
6 *professional standards or targets and to monitor changes and outcomes when these are used. During*  
7 *an audit and feedback process, an individual's or department's professional practice and/or*  
8 *performance is measured and compared to targets or professional standards. The results of this*  
9 *comparison are fed back to the individual by either a colleague, supervisor or third party, in the form*  
10 *of verbal or written communication. I would like to ask you some questions about what you think*  
11 *about audit and feedback.*

- 12 21. Could you tell me about a time where you have been involved in an audit and feedback  
13 project?  
14 a. *If they have been involved in an audit and feedback project:*  
15 i. What did you find helpful about the audit and feedback process?  
16 ii. What did you find challenging about the audit and feedback process?  
17 iii. What were the main things you learned from the audit and feedback  
18 process?  
19 iv. Overall, what was your opinion regarding the audit and feedback process?  
20  
21  
22 22. What areas of health do you think would be most interesting and relevant for audit and  
23 feedback? For example, this might include reasons for caesarean section, severe morbidity.  
24 Why are these interesting?  
25

26 *Audit and feedback to improve obstetric care may include activities like critical case incident*  
27 *reviews, indications for caesarean section, time from decision to operation for caesarean section,*  
28 *decision-making processes for caesarean section, and appropriate management of*  
29 *complications. This may be done by reviewing individual patient records, labour and delivery*  
30 *logs, and observations of clinical practice.*

- 31  
32 23. How would you feel about the idea of a regular audit and feedback process in your health  
33 facility to address rising caesarean section rates?  
34  
35  
36 24. What might be some of the benefits of audit and feedback may be related to caesarean  
37 section?  
38  
39 25. What might be some of the challenges of audit and feedback may be related to caesarean  
40 section?  
41  
42 26. Do you think starting an audit and feedback process may change people's behaviour in your  
43 department? Why or why not?  
44  
45 27. Do you think starting an audit and feedback process may change health outcomes? Why or  
46 why not?  
47  
48 28. What could be done in your health facility to ensure that audit and feedback is conducted in  
49 a supportive way that emphasises learning rather than punishing providers for certain  
50 behaviours?  
51  
52 29. How can audit and feedback be presented to you to ensure that any information gathered is  
53 "actionable" so that an individual can work to improve their practice?  
54  
55 30. What type of person would be the most appropriate person to:  
56  
57 a. Review medical records?  
58  
59 b. Analyse the data and prepare a summary report?  
60

- 1  
2  
3 c. To present or discuss the report with you?  
4 d. Probe: Would you prefer that this person were a colleague, supervisor, or someone  
5 external? Why?  
6  
7

8 31. Approximately how often do you think that audit and feedback processes should occur in  
9 your health facility? Please explain.  
10

11 *(Interviewer: do not ask these questions to antenatal nurses)*

12 *Interviewer: The next part of the study is about the **audit and feedback tools for classifying***  
13 ***caesarean sections**. These tools may be useful for healthcare providers and administrators to*  
14 *monitor which women are receiving caesarean sections, and also to help to compare caesarean*  
15 *section rates over time or across different health facilities and countries. This may help to design and*  
16 *implement interventions to make sure that an optimal caesarean section rate can occur in a specific*  
17 *health facility. I would like to ask you some questions about what you think of such audit and*  
18 *feedback tools. In order to understand drivers of rising Caesarean section rates, we need to have*  
19 *tools to monitor and compare caesarean section rates in a setting over time. One way to do this is*  
20 *the Robson classification system, which prospectively classifies women admitted for childbirth into*  
21 *one of ten groups.*  
22

- 23  
24 32. Have you heard of the Robson classification system before?  
25 a. *If yes:* Can you tell me what you know about the Robson classification system?  
26 b. *If no,* Do you know of any other classification systems to classify women giving birth?  
27  
28 33. Conducting audit and feedback for caesarean section requires reviewing patient medical  
29 records and/or facility logs. Could you tell me about how records are prepared and kept in  
30 your health facility?  
31 a. What is your perception regarding the completeness of labour and delivery records  
32 in your health facility?  
33 1. Probe: Do you think that labour and delivery records are complete and  
34 accurate for all or most women in your health facility? Why or why not?  
35 b. Probe: Who is responsible for recording in the medical records?  
36 c. Probe: In addition to the individual patient's record, how else is data collected and  
37 recorded on the labour and delivery ward?  
38 b. Probe: is there a facility-level logbook? If so, who is responsible for this? What type  
39 of data is recorded?  
40  
41  
42

43 **In-service training and implementation of clinical practice guidelines**

44 34. How well do you feel your training prepared you for your current position? Please explain.  
45  
46  
47  
48  
49  
50  
51  
52  
53  
54  
55  
56  
57  
58  
59  
60

1  
2  
3 *Interviewer: The next part of the study is about continuous training and implementation of clinical*  
4 *practice guidelines. This refers to the processes by which guideline recommendations are used to help*  
5 *healthcare providers make informed decisions about how and when to provide care in order to*  
6 *achieve the best health outcomes. I would like to ask you some questions about what you think about*  
7 *guideline implementation.*  
8

9 35. Are you aware of any clinical practice guidelines (algorithms/flowcharts/clinical protocols)  
10 related to obstetrics?

11 a. If yes, which clinical practice guidelines are you familiar with?

- 12 i. In your opinion, how valuable are the obstetrics clinical practice guidelines  
13 to your practice?  
14 ii. In your opinion, how accessible are these clinical practice guidelines to  
15 healthcare providers?  
16 iii. *Probe:* what could be done to improve the accessibility of clinical practice  
17 guidelines to other healthcare providers?  
18 iv. Could you describe the process of how obstetrics clinical practice guidelines  
19 are prioritised in your health facility?  
20 v. How are the clinical practice guidelines communicated to other healthcare  
21 providers in your facility?  
22 vi. How do you use clinical practice guidelines in your practice?

23 b. *If no, probe:*

- 24 i. How do healthcare providers in your facility make decisions about how to  
25 manage patients?  
26 ii. In your health facility, are clinical practice guidelines currently used in  
27 obstetrics?  
28 iii. In your opinion, what could be done to improve the accessibility of clinical  
29 practice guidelines to other healthcare providers?  
30  
31  
32

33 36. Imagine that your health facility will start a process of updating and implementing obstetrics  
34 clinical practice guidelines (algorithms/flowcharts/clinical protocols). Who would need to  
35 support this initiative in order for it to be successful?

36 a. *Probe:* Why would this person/these people need to support the initiative?

37 b. *Probe:* How would this person/these people best support the initiative?

38 c. What type of training would be helpful to ensure that all staff understand the clinical  
39 practice guidelines?

- 40 i. What type of topics would you like to have covered during the training?  
41 1. Would you be interested to learn about how clinical practice  
42 guidelines were developed? Why or why not?  
43 2. Would you be interested to learn about the evidence behind the  
44 recommendations in clinical practice guidelines, such as the  
45 systematic reviews or clinical trials?  
46 ii. How long should the training last for?  
47 iii. How often should the training be repeated?  
48 iv. Where should the training be held (e.g. within the facility, outside the  
49 facility)?  
50

51 d. What resources would be needed in order to successful implement obstetrics clinical  
52 protocols?  
53  
54  
55



- 1  
2  
3  
4  
5  
6  
7  
8  
9  
10  
11  
12  
13  
14  
15  
16  
17  
18  
19  
20  
21  
22  
23  
24  
25  
26  
27  
28  
29  
30  
31  
32  
33  
34  
35  
36  
37  
38  
39  
40  
41  
42  
43  
44  
45  
46  
47  
48  
49  
50  
51  
52  
53  
54  
55  
56  
57  
58  
59  
60
- e. In your opinion, what are some barriers to successful implementation of obstetrics clinical practice guidelines?
  - f. In your opinion, what are some facilitators to successful implementation of obstetrics clinical practice guidelines?
  - g. *Usually when clinical practice guidelines are implemented in health facilities, there are activities to evaluate if the guidelines are being implemented correctly and consistently.* What type of evaluation activities would be helpful to assess if obstetrics clinical practice guidelines were being implemented correctly and consistently?
    - i. What format would be appropriate to feedback the evaluations to healthcare providers?
    - ii. If meetings were held to feedback on the progress of obstetric clinical practice guidelines implementation, what would you like to hear discussed?
      - 1. Who would attend these meetings and why?
      - 2. How often would these meetings be held?
37. In your opinion, how important is providing pain relief for women during labour (vaginal birth only)? Why?
- a. In your facility, what pain relief options are there for women during labour (vaginal birth only)? Probe: pharmacological and non-pharmacological methods
  - b. In your opinion, how important is it for women to walk around during labour (vaginal birth only)? Why?
  - c. In your opinion, how important is it for women to be able to sit upright during labour (vaginal birth only)? Why?

### Opinion leader education

*Interviewer: The next part of the study is about using opinion leaders in a specific health facility to act as champions for change. Opinion leaders are influential individuals who are nominated by their peers to change the culture and norms of healthcare provider peer groups. For example, these individuals may be responsible for adapting clinical guidelines to a specific health facility context, and identifying measures to ensure quality improvement. I would like to ask you some questions about what you think about the use of opinion leaders in your health facility.*

- 38. What do you think are the characteristics of a good opinion leader?
- 39. What do you think about the idea of using opinion leaders to adapt clinical guidelines to your health facility?
- 40. What type of healthcare provider would be most appropriate to act as an opinion leader for caesarean section? (probe: nurse/midwife/doctor, what level of training)
- 41. How do you think an opinion leader would be received by other healthcare providers in your health facility?

- 1  
2  
3  
4  
5  
6  
7  
8  
9  
10  
11
42. What challenges do you think an opinion leader would face if they tried to adapt and implement clinical guidelines in your health facility?
43. What type of *training* would an opinion leader need to succeed?
44. What resources would an opinion leader need to succeed?

### Organization and relationships in the facility

- 12  
13  
14  
15  
16  
17  
18  
19  
20  
21  
22  
23  
24  
25  
26  
27  
28  
29  
30  
31  
32  
33  
34  
35  
36  
37  
38  
39  
40  
41  
42  
43  
44  
45  
46  
47  
48  
49  
50  
51  
52  
53  
54  
55  
56  
57  
58  
59  
60
45. Could you please describe for me what the relationship that you have with your peers is like?
- Could you tell me about a time when your peers supported you?
  - Could you tell me about a time when your peers did not support you?
  - If you are struggling to meet the demands of your work, can you look to your peers for help? How so?
  - In your opinion, are men and women treated equally in your work place? Why or why not?
46. In your opinion, how well do doctors and midwives work together in general?
- How well do you think doctors and midwives communicate?
  - What are some of the challenges in having midwives and doctors work together?
  - Can you tell me about a time when midwives and doctors did NOT work together?
    - Why do you think this happened?
  - Can you tell me about a time when midwives and doctors worked very well together?
    - Why do you think this happened?
47. Overall, how supportive do you feel that your work environment is? Please explain.
48. How do you feel about the current environment around malpractice lawsuits and legal liability for doctors?
- Do you feel that the health system or your health facility would support you in a legal case?
  - How do you think that the legal environment may influence your own, or your colleagues', medical practice?
49. Do you feel afraid of malpractice lawsuits in your current work? Please explain.
50. What strategies do you employ to minimise the risk of a malpractice lawsuit?
- Do you think these strategies are reasonable?

## Labour companionship

*Interviewer: The next part of the study is about the type of support that women could receive during childbirth in a health facility. In some settings, a "labour companion" can provide this type of support. A labour companion is a person of the woman's choice, for example her husband, her sister, her mother, her friend, or a doula, who stays with the woman throughout the duration of labour and childbirth. I would like to ask you some questions about what you think about support from a companion during childbirth.*

51. What type of support do you think women need during labour and childbirth?
  - a. Do you think that women in your hospital receive this kind of support you have described? Why or why not?
52. What do you know about labour companionship?
  - a. What are the benefits of labour companionship?
    - i. *Probe:* What are benefits for the woman?
    - ii. *Probe:* What are benefits for the providers?
    - iii. *Probe:* What are benefits for the companion?
  - b. Are there any harms of labour companionship?
    - i. *Probe:* What are harms for the woman?
    - ii. *Probe:* What are harms for the providers?
    - iii. *Probe:* What are harms for the companion?
53. Do you have any previous experience with working in a hospital that offered labour support?
  - i. If yes, what was this experience like for you as a provider?
54. Do you know if labour companionship is allowed in this hospital?
  - a. *If labour companionship is not allowed:* What do you think are the reasons for not allowing a labour companion in this hospital?
55. How could labour companionship be implemented in your hospital or other hospitals like this?
  - a. What would be the main challenges to implementing labour companionship?
  - b. Who do you think women would prefer as a labour companion? Why?
  - c. As a provider, what are your expectations from a woman's labour companion?
  - d. When would a labour companion be able to be with the woman in the hospital?
  - e. What would the role of the labour companion be?
    - i. How could the labour companion's roles be communicated to them?
  - f. At what point during the care process should women and providers start talking about labour companionship and the role of the companion?
  - g. What type of information or education do you think a labour companion would need to be able to support you?
  - h. How could we ensure that the companion is a person of the woman's choice, and not someone selected for her by someone else?
  - i. What changes do you think the hospital could make to make it more comfortable for women to have a labour companion?
  - j. If labour companionship is to be implemented in this hospital, what would ensure successful implementation?
    - a. What could be done to ensure that labour companionship was sustainable in the long-term?

## Appendix 2. Readiness assessment

|    |                  |  |
|----|------------------|--|
| 1. | Name of hospital |  |
| 2. | Hospital code    |  |

*This activity is part of the readiness assessment, to explore factors to be assessed, considered and integrated into implementation plans. There are five components of this readiness assessment:*

1. *Inventory of physical space and readiness;*
2. *Health workforce and model of care;*
3. *Protocols and guidelines for managing clinical care during labour and childbirth;*
4. *Continuous education and quality improvement*
5. *Assessment of data availability and access for audit and feedback; and*
6. *Understanding of labour companionship in practice.*

*For each of the study health facilities, please have a member of the research team visit to conduct an observation of the labour ward and medical records. It may be most appropriate for this person to have some clinical knowledge. We expect that this activity will take approximately four to six hours to complete (depending on how busy the facility is). Prior to conducting the readiness assessment, please ensure that all members of the maternity care unit at each health facility are briefed on the purpose of the activity, what the readiness assessment will entail, and how they may be of assistance. This will help to ensure that the readiness assessment (and other research activities) will be welcomed by the unit.*

### *Initial inventory*

|    |                                                                                                                           |  |
|----|---------------------------------------------------------------------------------------------------------------------------|--|
| 3. | # of Deliveries (1 October 2019 – 31 January 2020)                                                                        |  |
| 4. | No of delivery handled exclusively by a certain obstetrician (private)                                                    |  |
| 5. | Women not handled exclusively by a certain obstetrician (non-private)                                                     |  |
| 6. | No. of Caesarean section (1 October 2019 – 31 January 2020)                                                               |  |
| 7. | Elective (pre-labour c-section)<br><i>Note: if this information is not readily available, then please ignore for now.</i> |  |
| 8. | Emergency (intrapartum c-section)                                                                                         |  |
| 9. | No. of vaginal instrumental delivery (1 October 2019 – 31 January 2020)                                                   |  |

**Part 1. Inventory of physical space and resources**

*Please observe the physical space of the labour, delivery and postnatal wards. If these are in separate areas (e.g.: women in latent labour in a labour ward, women in active labour in a separate room/delivery ward, separate postnatal ward), please assess both areas according to all points below. Please provide a narrative description of the wards, as well as a visual depiction.*

Description of the physical space

**Please detail:**

|                                                                                   |  |
|-----------------------------------------------------------------------------------|--|
| # of beds in labour /admission room (1 <sup>st</sup> stage of labour room):       |  |
| # of beds in labour / childbirth room (2 <sup>nd</sup> stage of labour room):     |  |
| # Ultrasound machine in the labour room (indicate number working)                 |  |
| # Electronic fetal heart rate monitor (CTG) (indicate number of devices working ) |  |

Description of any curtains, dividers or other means of protecting a woman’s privacy

Description of the potential for crowding. For example, how many beds are present? Are they currently or usually full? What happens if there is overcrowding?

1  
2  
3 Description of the visiting hours and allowable visitors (check if visually displayed and ask an administrator)  
4 (please take a photo if there is a sign)  
5

6  
7  
8  
9  
10  
11  
12  
13  
14

15 Description of the accessibility to toilets or washrooms

16  
17  
18  
19  
20  
21  
22  
23  
24  
25

26 Description of overnight accommodation for family members/friends of women (check if visually displayed and  
27 ask an administrator)  
28

29  
30  
31  
32  
33  
34  
35  
36

37 Description of the **operating theatres** (how is access to the theatre, is there one theatre reserved for  
38 obstetrics, is the theatre on the same floor? How are handwashing facilities)  
39

40  
41  
42  
43  
44  
45  
46  
47

48  
49 Please detail how many theatres are exclusively to perform a CS (#)

50  
51  
52  
53  
54  
55  
56  
57  
58  
59  
60

1  
2  
3  
4  
5  
6  
7  
8  
9  
10  
11  
12  
13  
14  
15  
16  
17  
18  
19  
20  
21  
22  
23  
24  
25  
26  
27  
28  
29  
30  
31  
32  
33  
34  
35  
36  
37  
38  
39  
40  
41  
42  
43  
44  
45  
46

Please sketch the physical space



**Part 2.** Health workforce and model of care.

Completing this section may require both observation of the labour ward and a discussion with staff, e.g.: a matron-in-charge or head of obstetrics.

Please indicate below the **staffing available for the delivery ward alone**. Please include all staff on the payroll. Please do not count the staff only working on ANC or PNC. If staff works part-time in the maternity, try to summarise to have full-time-equivalents.

| STAFFING – LABOUR AND DELIVERY WARD ONLY |                                                      |                                        |
|------------------------------------------|------------------------------------------------------|----------------------------------------|
|                                          | Staff category                                       | Number employed (Full-time equivalent) |
| 1.                                       | Obstetrician                                         |                                        |
| 2.                                       | Anaesthesiologists                                   |                                        |
| 3.                                       | Paediatrician                                        |                                        |
| 4.                                       | Medical doctors (graduated, no specialization)       |                                        |
| 5.                                       | Residents (medics in training)                       |                                        |
| 6.                                       | Nurses / nurse-midwives                              |                                        |
| 7.                                       | Distinct midwives (exclusively trained on midwifery) |                                        |
| 8.                                       | Delivery assistants / auxiliary nursing staff        |                                        |
| 9.                                       | Cleaners / other auxiliary non-nursing staff         |                                        |

| STAFFING ON SHIFTS IN LABOUR AND DELIVERY |                                                      |                                                     |                                                       |
|-------------------------------------------|------------------------------------------------------|-----------------------------------------------------|-------------------------------------------------------|
|                                           | Staff category                                       | DAY SHIFT<br>Number employed (Full-time equivalent) | NIGHT SHIFT<br>Number employed (Full-time equivalent) |
| 1.                                        | Obstetrician                                         |                                                     |                                                       |
| 2.                                        | Anesthesiologists                                    |                                                     |                                                       |
| 3.                                        | Pediatrician                                         |                                                     |                                                       |
| 4.                                        | Medical doctors (graduated, no specialization)       |                                                     |                                                       |
| 5.                                        | Residents (medics in training)                       |                                                     |                                                       |
| 6.                                        | Nurses / nurse-midwives                              |                                                     |                                                       |
| 7.                                        | Distinct midwives (exclusively trained in midwifery) |                                                     |                                                       |
| 8.                                        | Delivery assistants / auxiliary nursing staff        |                                                     |                                                       |
| 9.                                        | Cleaners / other auxiliary non-nursing staff         |                                                     |                                                       |



Please indicate below the **staffing available for the ANTENATAL CARE ward alone. Please include all staff on the payroll.** Please do not count the staff only working on ANC or PNC. If staff works part-time in the maternity, try to summarise to have Full-time-equivalents.

| STAFFING – ANTENATAL CARE WARD ONLY |                                                      |                                        |
|-------------------------------------|------------------------------------------------------|----------------------------------------|
|                                     | Staff category                                       | Number employed (Full-time equivalent) |
| 1.                                  | Obstetrician                                         |                                        |
| 2.                                  | Anesthesiologists                                    |                                        |
| 3.                                  | Pediatrician                                         |                                        |
| 4.                                  | Medical doctors (graduated, no specialization)       |                                        |
| 5.                                  | Residents (medics in training)                       |                                        |
| 6.                                  | Nurses / nurse-midwives                              |                                        |
| 7.                                  | Distinct midwives (exclusively trained on midwifery) |                                        |
| 8.                                  | Delivery assistants / auxiliary nursing staff        |                                        |
| 9.                                  | Cleaners / other auxiliary non-nursing staff         |                                        |

| STAFFING ON SHIFTS IN ANTENATAL CARE WARD |                                                      |                                                     |                                                       |
|-------------------------------------------|------------------------------------------------------|-----------------------------------------------------|-------------------------------------------------------|
|                                           | Staff category                                       | DAY SHIFT<br>Number employed (Full-time equivalent) | NIGHT SHIFT<br>Number employed (Full-time equivalent) |
| 1.                                        | Obstetrician                                         |                                                     |                                                       |
| 2.                                        | Anesthesiologists                                    |                                                     |                                                       |
| 3.                                        | Pediatrician                                         |                                                     |                                                       |
| 4.                                        | Medical doctors (graduated, no specialization)       |                                                     |                                                       |
| 5.                                        | Residents (medics in training)                       |                                                     |                                                       |
| 6.                                        | Nurses / nurse-midwives                              |                                                     |                                                       |
| 7.                                        | Distinct midwives (exclusively trained in midwifery) |                                                     |                                                       |
| 8.                                        | Delivery assistants / auxiliary nursing staff        |                                                     |                                                       |
| 9.                                        | Cleaners / other auxiliary non-nursing staff         |                                                     |                                                       |

Please explain the on-call system: Is the doctor to perform a CS in the hospital even at night, or is s/he on-call at home? Are there other resource-persons one can call in if needed?

**Part 3.** Protocols and guidelines for managing clinical care during labour and childbirth.

Please list the protocols available and in use in this hospital. Please indicate if the head of maternity indicates the presence. If so ask about the type of guidelines (national standard guidelines e.g by MoH or professional organisation) and if the guideline is physically available, e.g in a folder or displayed at the wall.

| S. No | List of Protocols                         | Present         | Type                                           | Displayed |
|-------|-------------------------------------------|-----------------|------------------------------------------------|-----------|
|       |                                           | 1. Yes<br>2. No | 1. National Standards<br>2. Hospital Specified | Yes<br>No |
| 1.    | Partograph use / fetal monitoring         |                 |                                                |           |
| 2.    | Active Management of Third Stage of labor |                 |                                                |           |
| 3.    | Postpartum haemorrhage management         |                 |                                                |           |
| 4.    | Blood transfusion                         |                 |                                                |           |
| 5.    | Pre-term labor                            |                 |                                                |           |
| 6.    | Induction / augmentation of labour        |                 |                                                |           |
| 7.    | Antenatal steroids                        |                 |                                                |           |
| 8.    | Obstructed labour                         |                 |                                                |           |
| 9.    | Previous CS (trial of labour)             |                 |                                                |           |

1  
2  
3 *Completing this section may require both observation of the labour ward (e.g.: posters or signs) and*  
4 *a discussion with staff, e.g.: a matron-in-charge or head of obstetrics. If possible, make a photo if*  
5 *there are guidelines on the wall.*  
6

7  
8 Could you describe how any clinical protocols or guidelines for managing *routine or complicated*  
9 *labour and childbirth* care were developed or adapted, and updated? Is there a team in the hospital  
10 taking care of this? Can you explain how are these clinical protocols/guidelines used?  
11

12  
13  
14  
15  
16  
17  
18  
19  
20  
21  
22  
23  
24  
25  
26  
27  
28  
29

30  
31  
32 **Continuous education and quality improvement**

33 *Specify for trainings provided in the last 1 year*  
34

35  
36  
37  
38  
39  
40  
41  
42  
43  
44  
45  
46  
47  
48  
49  
50  
51  
52  
53  
54  
55  
56  
57  
58  
59  
60

| List of training provided                  | Type<br>1. National Standard training<br>2. Hospital Specified | Was the training provided to<br>1. All providers<br>2. Only doctors<br>3. Only nurse-midwives |
|--------------------------------------------|----------------------------------------------------------------|-----------------------------------------------------------------------------------------------|
| Partograph use / fetal monitoring          |                                                                |                                                                                               |
| Active Management of Third Stage of labour |                                                                |                                                                                               |
| Postpartum haemorrhage management          |                                                                |                                                                                               |
| Blood transfusion                          |                                                                |                                                                                               |
| Pre-term labor /                           |                                                                |                                                                                               |
| Introduction / augmentation of labour      |                                                                |                                                                                               |
| Antenatal steroids                         |                                                                |                                                                                               |
| Obstructed labour                          |                                                                |                                                                                               |
| Previous CS (trial of labour)              |                                                                |                                                                                               |

1  
2  
3 *Could you please describe other quality improvement activities ongoing in this facility. How are*  
4 *nurses and doctors informed about new knowledge and guidelines? Do you need to go regularly to*  
5 *refresh knowledge to workshops or trainings?*  
6  
7

8  
9  
10  
11  
12  
13  
14  
15  
16  
17

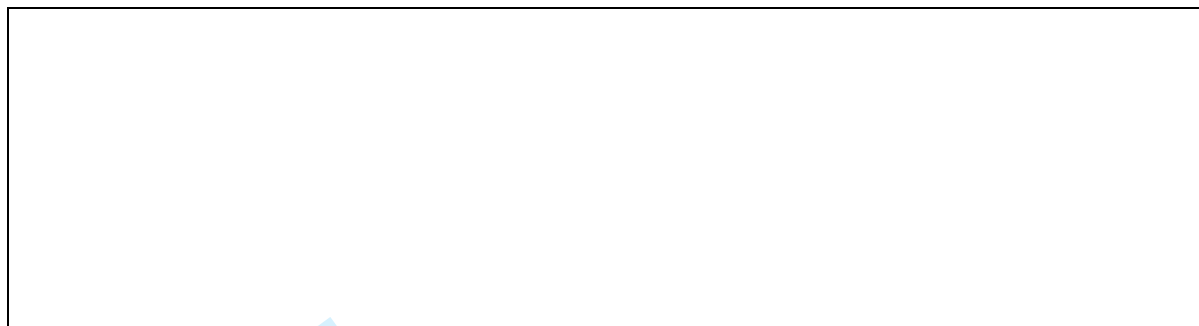

18  
19 *Do you do on-the-job training / mentoring of younger colleagues? Is there a system of supervision? Is*  
20 *there a system to discuss difficult cases, e.g. during a morning report? Do you do audits of cases?*  
21  
22

23  
24  
25  
26  
27  
28  
29  
30  
31  
32  
33  
34  
35  
36  
37  
38  
39



40  
41 **Please explain how informed consent is obtained for caesarean section** (oral, written, included in  
42 **medical record, etc).**  
43

44  
45  
46  
47  
48  
49  
50  
51  
52  
53  
54

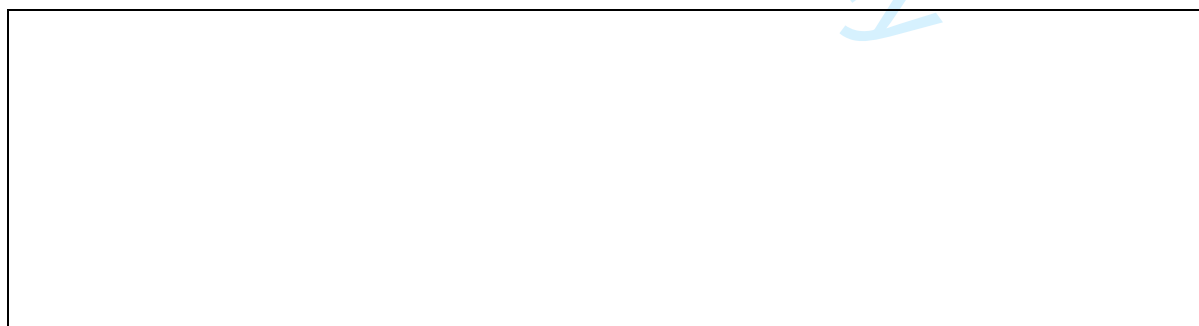

55  
56  
57  
58  
59  
60

1  
2  
3 **Part 4.** Assessment of facility medical records and data management systems  
4

5 *Please review individual medical records to assess the information currently collected related to key obstetric*  
6 *variables at an individual level. Please also review any facility-level register, log book or other records to assess*  
7 *information currently collected related to key obstetric variables at a facility level. It may be helpful to discuss*  
8 *the medical and facility records with the staff, e.g.: a matron-in-charge or head of obstetrics. Collecting this*  
9 *information will help to inform the implementation of the Robson classification system, e.g.: to identify what*  
10 *data is already routinely collected, and what data may need to be added to routine data collection.*  
11

12 Please explain which information is used. Description of other information routinely collected about  
13 caesarean section (e.g. provider, morbidity)  
14

15  
16  
17  
18  
19  
20  
21  
22

23  
24 There are typically two different places for documentation a) facility-level register, log book, or other  
25 records collating key obstetric variables and b) case notes/patient records. Now first we like to have  
26 information on the first type:  
27

28 Please describe the description of any facility-level register, log book, or other records collating key  
29 obstetric variables at the facility-level. Please include whether this register is paper-based or  
30 electronic, when it is updated, when and how information is summarised and how often it is  
31 reported. Please take a photo (covering patient names).  
32  
33

34  
35  
36  
37  
38  
39  
40  
41  
42

43  
44  
45 Who is responsible for completing the facility-level register?  
46

47  
48  
49  
50  
51  
52  
53

1  
2  
3 How often is the facility-level register updated and summaries are prepared?  
4  
5

6  
7  
8  
9  
10  
11  
12

13  
14 How is the information about facility-level key obstetric variables and outcomes currently integrated  
15 into audit and feedback?  
16

17  
18  
19  
20  
21  
22  
23  
24

25  
26 Description of the consistency of reporting for these indicators (e.g.: consistently reported across all  
27 records reviewed, some data missing – be specific).  
28

29  
30  
31  
32  
33  
34  
35  
36  
37

38  
39 Who is present during audit and feedback sessions, and who leads the sessions?  
40

41  
42  
43  
44  
45  
46  
47  
48  
49  
50

Description of the health facility’s “decision-to-incision” time to perform a caesarean section. If not available, please specify.

**Now concerning the second type of records:** case notes/medical records: Please describe the medical record structure (e.g. electronic or paper), and who keeps the records (e.g. woman or provider)? Is there a standard form? Is the WHO partograph used? Are the data used for audits and feedback?

Is there any regular feedback of these reports to the providers? If so, how often and in what format?

*Review of medical records to assess if key obstetric variables needed for Robson classification are correctly and consistently reported at an individual level. For each variable, please (1) ask the administrator how it is reported, and (2) observe a subset of records to assess how variable is actually reported (e.g. 5-10 medical records).*

| Parity                 |                        |
|------------------------|------------------------|
| Administrator response | Observation of records |
|                        |                        |

1  
2  
3  
4  
5  
6  
7  
8  
9

| <b>Previous caesarean section</b> |                               |
|-----------------------------------|-------------------------------|
| <b>Administrator response</b>     | <b>Observation of records</b> |
|                                   |                               |

10  
11  
12  
13  
14  
15  
16  
17  
18

| <b>Onset of labour (spontaneous, induced, no labour/pre-labour caesarean section)</b> |                               |
|---------------------------------------------------------------------------------------|-------------------------------|
| <b>Administrator response</b>                                                         | <b>Observation of records</b> |
|                                                                                       |                               |

19  
20  
21  
22  
23  
24  
25  
26  
27

| <b>Gestational age (preterm &lt;37 weeks, term <math>\geq</math> 37 weeks)</b> |                               |
|--------------------------------------------------------------------------------|-------------------------------|
| <b>Administrator response</b>                                                  | <b>Observation of records</b> |
|                                                                                |                               |

28  
29  
30  
31  
32  
33  
34  
35  
36

| <b>Fetal presentation or lie (cephalic, breech, transverse)</b> |                               |
|-----------------------------------------------------------------|-------------------------------|
| <b>Administrator response</b>                                   | <b>Observation of records</b> |
|                                                                 |                               |

37  
38  
39  
40  
41  
42  
43  
44  
45

| <b>Number of fetuses (singleton, multiple)</b> |                               |
|------------------------------------------------|-------------------------------|
| <b>Administrator response</b>                  | <b>Observation of records</b> |
|                                                |                               |

46  
47  
48  
49

Who is responsible for completing the individual-level medical records? Does anyone else check for consistent and correct reporting?

50  
51  
52  
53  
54  
55  
56  
57  
58  
59  
60

|  |
|--|
|  |
|--|



1  
2  
3 Based on the observations and record assessment, what would you consider to be the most  
4 appropriate method of implementation of the Robson classification system (manually, using a  
5 spreadsheet or automatic calculator, or via electronic records)? Please explain.  
6  
7

8  
9  
10  
11  
12  
13  
14  
15  
16

17  
18 [Ask the administrator] What type of person would be the most appropriate facility-level champion  
19 to implement the Robson classification system, and why? [e.g.: type of provider, what skills this  
20 person would have]  
21

22  
23  
24  
25  
26  
27  
28  
29  
30

31  
32 [Ask the administrator] Who is the best person to record data for Robson classification, and why?  
33

34  
35  
36  
37  
38  
39  
40  
41

42  
43 [Ask the administrator] Who is the best person to analyse data for Robson classification, and why?  
44

45  
46  
47  
48  
49  
50  
51  
52

1  
2  
3 [Ask the administrator] Who is the best person to report and present data for Robson classification,  
4 and why?  
5

6  
7  
8  
9  
10  
11  
12

13  
14 **Part 5. Understanding of labour companionship in practice**

15  
16 *Completing this section may require both observation of the labour ward and a discussion with staff,*  
17 *e.g.: a matron-in-charge or head of obstetrics. If companionship is not currently allowed at the*  
18 *facility, please specify below.*

19  
20 Description of who is currently allowed to act as a companion for the woman

21  
22  
23  
24  
25  
26  
27  
28  
29

30  
31  
32 Description of for what periods of time companionship is offered (e.g.: from admission to discharge,  
33 during labour but not childbirth, only at childbirth)

34  
35  
36  
37  
38  
39  
40  
41  
42

43  
44  
45 **Please detail at what stages / and time of the day companions are allowed:**

46  
47  
48  
49  
50  
51  
52  
53  
54  
55  
56  
57  
58  
59  
60

|                                                 |          |
|-------------------------------------------------|----------|
| Labour / first stage                            | Yes / no |
| Delivery / second stage                         | Yes / no |
| Immediate postpartum period (first hour or two) | Yes / no |
| Postnatal ward                                  | Yes / no |
| Day-time                                        | Yes / no |
| Night-time                                      | Yes / no |

1  
2  
3 Description of the roles that companions usually undertake (e.g.: emotional support, providing  
4 food/water/tea to the woman, supporting staff)  
5  
6

7  
8  
9  
10  
11  
12  
13  
14  
15

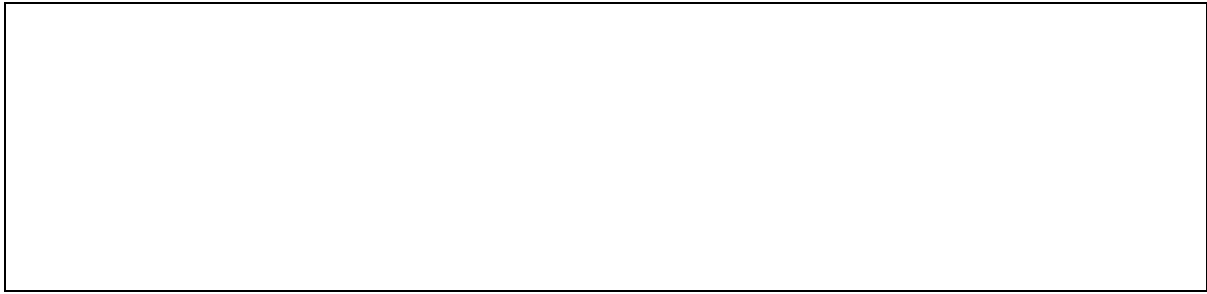

16  
17 Description of how staff currently interact with companions  
18

19  
20  
21  
22  
23  
24  
25  
26  
27  
28

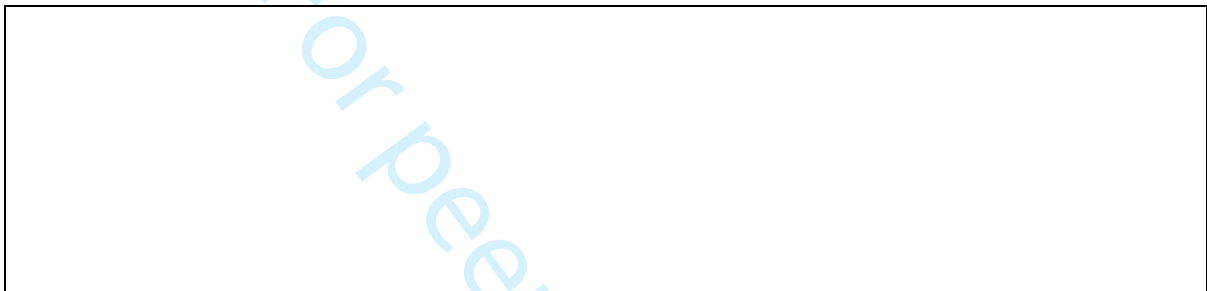

29  
30 Existence and content of any orientation materials, protocols, or guidelines related to how staff  
31 should work with companions, or on the role of companions. If no materials exist, please state this.  
32

33  
34  
35  
36  
37  
38  
39  
40  
41  
42  
43  
44



45  
46 Any other feedback, observations or reflections  
47

48  
49  
50  
51  
52  
53  
54  
55  
56  
57  
58  
59  
60



Supplement: bmjopen-2021-054946.draft_revisions.pdf [file bmjopen-2021-054946.draft_revisions.pdf]
